# Supplementary material for: Syngap1 regulates the synaptic drive and membrane excitability of Parvalbumin-positive interneurons in mouse auditory cortex
Source: eLife. 2025 Aug 14;13:RP97100. doi: 10.7554/eLife.97100 (PMC12352866; doi:10.7554/eLife.97100)
Supplement: Figure 1—source data 1. [file elife-97100-fig1-data1.xlsx]

## Sheet: Sheet1
	Control	cHet	LMM
	(n=14, 7 anim.)	(n=11, 6 anim.)
sEPSC ampl.	17.92 ±1.32 pA	12.80±1.26 pA	F=7.067
			p=0.014*
AUC sEPSC	63.02±11.92 pA x ms	34.54±2.96 pA x ms	F=3.135
			p=0.090
sEPSC time interval	127.71±16.95 ms	253.21±77.99 ms	F=1.520
			p=0.230
ΔQ * f	0.62±0.15	0.29±0.08	F=2.340
			p=0.140
Rise time sEPSC	0.36±0.05 ms	0.30±0.03 ms	F=0.240
			p=0.629
Decay time sEPSC	2.31±0.41 ms	1.62±0.18 ms	F=1.350
			p=0.257
mEPSC ampl.	15.89±0.83 pA	13.34±1.58 pA	F=2.161
			p=0.155
AUC mEPSC	64.51±10.25 pA x ms	30.51±2.52 pA x ms	F=7.506
			p=0.012*
mEPSC time interval	99.42 ±11.62 ms	296.42 ±83.24 ms	F=4.049
			p=0.056
Quantal content	1.14±0.07	1.01±0.07	F=1.824
			p=0.189
ΔQ * f	0.73±0.12	0.18±0.03 ms	F=11.687
			p=0.002**
Rise time mEPSC	0.41±0.07 ms	0.28±0.02 ms	F=1.285
			p=0.269
Decay time mEPSC	2.91±0.66 ms	1.78±0.26 ms	F=1.779
			p=0.193
