# Supplementary material for: Syngap1 regulates the synaptic drive and membrane excitability of Parvalbumin-positive interneurons in mouse auditory cortex
Source: eLife. 2025 Aug 14;13:RP97100. doi: 10.7554/eLife.97100 (PMC12352866; doi:10.7554/eLife.97100)
Supplement: Figure 1—source data 2. [file elife-97100-fig1-data2.xlsx]

## Sheet: sEPSC BC L4
	Cell	Mouse line	Genotype	Sex	DOB	Mouse #	Age	Amplitude	Inter Event interval	Frequency	AUC	AUC/1000	Charge x freq	Rise	Decay	File	Current injected	Ra	Anatomy	Layer	Tag
Animal 5	191121RF1	Tg(Nkx2.1-Cre);Syngap1flox/+	control	Male	05.09.21	449	75	24.39	95.34	10.4167	172.6	0.1726	1.79792	0.74	5.39	1	-35	12	BC	L4	GFP
Animal 5	191121RF2	Tg(Nkx2.1-Cre);Syngap1flox/+	control	Male	05.09.21	449	75	22.31	73.84	13.4417	153.6	0.1536	2.06464	0.76	4.61	3	-30	12	BC	L4	GFP
Animal 5	191121RF6	Tg(Nkx2.1-Cre);Syngap1flox/+	control	Male	05.09.21	449	75	13.12	196.049	5.08333	45.85	0.04585	0.233071	0.39	1.92	11	-25	13	BC	L4	GFP
Animal 6	141221RF1	Tg(Nkx2.1-Cre);Syngap1flox/+	control	Male	02.10.21	574	73	21.29	61.8109	16.1083	60.22	0.05832	0.939438	0.33	1.52	0	5	11	BC	L4	GFP
Animal 11	310522RF3	Tg(Nkx2.1-Cre);Syngap1flox/+	control	Male	31.03.22	N417	61	12.64	115.873	8.49167	44.03	0.04403	0.373888	0.3	1.45	4	-105	12	BC	L4	GFP
Animal 12	051224RF1b	Tg(Nkx2.1-Cre);Syngap1flox/+	control	Male	03.10.24	6	63	19.19	134.693	7.25397	67.9	0.0679	0.492544	0.3	2.25	4	8	18	BC	L4	GFP
Animal 12	051224RF2b	Tg(Nkx2.1-Cre);Syngap1flox/+	control	Male	03.10.24	6	63	12.5	267.472	3.68333	65.2	0.0652	0.240153	0.65	5.37	8	-3	17	BC	L4	GFP
Animal 12	051224RF3b	Tg(Nkx2.1-Cre);Syngap1flox/+	control	Male	03.10.24	6	63	12.2	167.052	5.80159	41.9	0.0419	0.243087	0.26	2	10	-5	19	BC	L4	GFP
Animal 12	051224RF4b	Tg(Nkx2.1-Cre);Syngap1flox/+	control	Male	03.10.24	6	63	17.9	108.594	9.01587	37.7	0.0377	0.339898	0.24	1.45	14	9	17	BC	L4	GFP
Animal 13	140125RF3	Tg(Nkx2.1-Cre);Syngap1flox/+	control	Male	26.10.24	Q241	80	17.57	201.712	4.80159	43.5	0.0435	0.208869	0.24	1.61	6	-8	11	BC	L4	GFP
Animal 14	150125RF2	Tg(Nkx2.1-Cre);Syngap1flox/+	control	Male	13.11.24	Q273	63	28.31	152.986	6.34921	61.8	0.0618	0.392381	0.24	1.58	3	9	10	BC	L4	GFP
Animal 14	150125RF4	Tg(Nkx2.1-Cre);Syngap1flox/+	control	Male	13.11.24	Q273	63	18.94	105.1	9.23016	34.4	0.0344	0.317517	0.2	1.09	11	40	10	BC	L4	GFP
Animal 15	160125RF2	Tg(Nkx2.1-Cre);Syngap1flox/+	control	Male	13.11.24	Q274	64	17.2	45.1072	21.881	32.6	0.0326	0.713319	0.2	1.23	2	20	11	BC	L4	GFP
Animal 15	160125RF3	Tg(Nkx2.1-Cre);Syngap1flox/+	control	Male	13.11.24	Q274	64	13.37	62.3146	15.8413	21.1	0.0211	0.334251	0.19	0.98	4	2	12	BC	L4	GFP
Animal 18	230921RF3c	Tg(Nkx2.1-Cre);Syngap1flox/+	cHet	Male	19.07.21	717	65	6.54	862.18	1.12	23.07	0.02307	0.0258384	0.35	2.49	20	-140	13	BC	L4	GFP
Animal 18	230921RF4	Tg(Nkx2.1-Cre);Syngap1flox/+	cHet	Male	19.07.21	717	65	8.97	625.48	1.54667	22.51	0.02251	0.0348155	0.37	1.72	22	-20	12	BC	L4	GFP
Animal 19	280921RF1	Tg(Nkx2.1-Cre);Syngap1flox/+	cHet	Male	21.07.21	725	69	8.75	131.93	7.50833	28.1	0.0281	0.210984	0.29	1.53	1	-80	15	BC	L4	GFP
Animal 20	151221RF1	Tg(Nkx2.1-Cre);Syngap1flox/+	cHet	Male	02.10.21	574	73	7.19	167.999	5.94167	40.77	0.04077	0.242242	0.62	2.78	0	-80	12	BC	L4	GFP
Animal 20	151221RF3	Tg(Nkx2.1-Cre);Syngap1flox/+	cHet	Male	02.10.21	575	74	13.72	239.92	4.10833	40.69	0.04069	0.167168	0.35	1.65	4	-85	11	BC	L4	GFP
Animal 21	161221RF1	Tg(Nkx2.1-Cre);Syngap1flox/+	cHet	Male	02.10.21	571	75	15.71	47.4697	20.975	24.4	0.0244	0.51179	0.26	0.92	0	-80	12	BC	L4	GFP
Animal 22	121124RF1	Tg(Nkx2.1-Cre);Syngap1flox/+	cHet	Male	04.09.24	7	69	19.21	100.624	9.66667	36.9	0.0369	0.3567	0.21	1.2	0	-90	20	BC	L4	GFP
Animal 22	121124RF4	Tg(Nkx2.1-Cre);Syngap1flox/+	cHet	Male	04.09.24	7	69	15.96	53.0029	18.627	53.9	0.0539	1.00399	0.12	0.67	13	15	19	BC	L4	GFP
Animal 23	131124RF1	Tg(Nkx2.1-Cre);Syngap1flox/+	cHet	Male	04.09.24	6	70	14.97	100.871	9.65873	29.5	0.0295	0.284933	0.21	1.28	1	-22	23	BC	L4	GFP
Animal 23	131124RF3	Tg(Nkx2.1-Cre);Syngap1flox/+	cHet	Male	04.09.24	6	70	14.78	167.148	5.69048	38.4	0.0384	0.218514	0.26	1.77	6	-5	22	BC	L4	GFP
Animal 23	131124RF4b	Tg(Nkx2.1-Cre);Syngap1flox/+	cHet	Male	04.09.24	6	70	15.02	288.75	3.3254	41.7	0.0417	0.138669	0.28	1.88	19	-10	25	BC	L4	GFP
						Control	AVG	17.9236	127.71	9.81426	63.0286	0.0628929	0.620784	0.36	2.31786
							SD	4.9416	63.4425	5.24444	44.6144	0.0446265	0.592941	0.202066	1.56748
							SE	1.3207	16.9557	1.40164	11.9237	0.0119269	0.15847	0.0540045	0.418926
								19.2443	144.666	11.2159	74.9523	0.0748198	0.779254	0.414004	2.73678
						cHet	AVG	12.8018	253.216	8.0153	34.54	0.03454	0.290513	0.301818	1.62636
							SD	4.19138	258.679	6.50076	9.84457	0.00984457	0.273857	0.128282	0.624152
							SE	1.26375	77.9946	1.96005	2.96825	0.00296825	0.0825709	0.0386786	0.188189
								14.0656	331.211	9.97535	37.5083	0.0375083	0.373084	0.340497	1.81455
							LMM
							F value	7.067	1.52	0.213	3.135		2.34	0.24	1.35
							p value	0.014	0.23	0.649	0.09		0.14	0.629	0.257

## Sheet: mEPSC BC L4
	Cell	Mouse line	Genotype	Sex	DOB	Mouse #	Age	Amplitude	Inter Event interval	Frequency	AUC	AUC/1000	Charge x freq	Rise	Decay	File	Current injected	Ra	Anatomy	Layer	Tag
Animal 1	191121RF1	Tg(Nkx2.1-Cre);Syngap1flox/+	control	Male	05.09.21	449	75	13.2	87.3921	11.3917	131.3	0.1313	1.49573	1.06	9.41	2	-85	11	BC	L4	GFP
Animal 1	191121RF2	Tg(Nkx2.1-Cre);Syngap1flox/+	control	Male	05.09.21	449	75	15.54	95.6057	9.56667	135.9	0.1359	1.30011	0.9	5.73	4	-55	12	BC	L4	GFP
Animal 1	191121RF6	Tg(Nkx2.1-Cre);Syngap1flox/+	control	Male	05.09.21	449	75	21.4	78.7734	12.65	48.8	0.0488	0.61732	0.35	1.87	12	-25	12	BC	L4	GFP
Animal 2	141221RF1	Tg(Nkx2.1-Cre);Syngap1flox/+	control	Male	02.10.21	574	73	17.29	44.33	22.525	73.2	0.0732	1.64883	0.4	2.05	1	-25	12	BC	L4	GFP
Animal 3	310522RF3	Tg(Nkx2.1-Cre);Syngap1flox/+	control	Male	31.03.22	N417	61	10.44	125.45	7.33333	42.08	0.04208	0.308587	0.3	1.46	5	-165	14	BC	L4	GFP
Animal 4	051224RF1b	Tg(Nkx2.1-Cre);Syngap1flox/+	control	Male	03.10.24	6	63	15.27	171.368	5.61905	61.2	0.0612	0.343886	0.33	2.51	6	-3	20	BC	L4	GFP
Animal 4	051224RF2b	Tg(Nkx2.1-Cre);Syngap1flox/+	control	Male	03.10.24	6	63	15.95	120.87	8.03968	126.6	0.1266	1.01782	0.79	6.53	9	-25	17	BC	L4	GFP
Animal 4	051224RF3b	Tg(Nkx2.1-Cre);Syngap1flox/+	control	Male	03.10.24	6	63	13.2	165.543	5.88095	47.7	0.0477	0.280521	0.27	2.19	11	-22	19	BC	L4	GFP
Animal 4	051224RF4b	Tg(Nkx2.1-Cre);Syngap1flox/+	control	Male	03.10.24	6	63	16.67	92.9168	10.5556	41.8	0.0418	0.441222	0.27	1.66	15	9	17	BC	L4	GFP
Animal 5	140125RF3	Tg(Nkx2.1-Cre);Syngap1flox/+	control	Male	26.10.24	Q241	80	16.31	150.086	6.5	43.6	0.0436	0.2834	0.25	1.64	7	-30	13	BC	L4	GFP
Animal 6	150125RF2	Tg(Nkx2.1-Cre);Syngap1flox/+	control	Male	13.11.24	Q273	63	21.79	99.3665	9.78571	60.9	0.0609	0.59595	0.28	2.22	4	-28	12	BC	L4	GFP
Animal 6	150125RF4	Tg(Nkx2.1-Cre);Syngap1flox/+	control	Male	13.11.24	Q273	63	17.77	80.9709	12.1349	34.5	0.0345	0.418655	0.21	1.01	12	-12	11	BC	L4	GFP
Animal 7	160125RF2	Tg(Nkx2.1-Cre);Syngap1flox/+	control	Male	13.11.24	Q274	64	15.04	30.3147	32.7857	32.6	0.0326	1.06881	0.21	1.45	3	-31	11	BC	L4	GFP
Animal 7	160125RF3	Tg(Nkx2.1-Cre);Syngap1flox/+	control	Male	13.11.24	Q274	64	12.72	48.9088	20.246	23	0.023	0.465659	0.2	1.14	5	-9	14	BC	L4	GFP
Animal 8	230921RF3c	Tg(Nkx2.1-Cre);Syngap1flox/+	cHet	Male	19.07.21	717	65	7.18	767.77	1.125	23.77	0.02377	0.0267413	0.39	2.54	21	-170	14	BC	L4	GFP
Animal 8	230921RF4	Tg(Nkx2.1-Cre);Syngap1flox/+	cHet	Male	19.07.21	717	65	14.83	781.28	1.13333	36.43	0.03643	0.0412873	0.27	1.31	23	-30	12	BC	L4	GFP
Animal 9	280921RF1	Tg(Nkx2.1-Cre);Syngap1flox/+	cHet	Male	21.07.21	725	69	6.92	233.55	4.19167	21.97	0.02197	0.0920909	0.33	1.87	2	-70	16	BC	L4	GFP
Animal 10	151221RF1	Tg(Nkx2.1-Cre);Syngap1flox/+	cHet	Male	02.10.21	575	74	4.74	589.817	1.64167	21.89	0.02189	0.0359361	0.46	3.94	1	-110	16	BC	L4	GFP
Animal 10	151221RF3	Tg(Nkx2.1-Cre);Syngap1flox/+	cHet	Male	02.10.21	575	74	12.51	202.54	4.88333	37.2	0.0372	0.18166	0.36	1.94	5	-110	12	BC	L4	GFP
Animal 11	161221RF1	Tg(Nkx2.1-Cre);Syngap1flox/+	cHet	Male	02.10.21	571	75	13.58	65.2924	15.2667	22	0.022	0.335867	0.27	0.95	1	-90	12	BC	L4	GFP
Animal 12	121124RF1	Tg(Nkx2.1-Cre);Syngap1flox/+	cHet	Male	04.09.24	7	69	22.27	112.42	8.59524	39.2	0.0392	0.336933	0.18	1.33	1	-105	21	BC	L4	GFP
Animal 12	121124RF4	Tg(Nkx2.1-Cre);Syngap1flox/+	cHet	Male	04.09.24	7	69	17.2	73.4432	13.4127	22.1	0.0221	0.296421	0.15	0.76	14	0	19	BC	L4	GFP
Animal 13	131124RF1	Tg(Nkx2.1-Cre);Syngap1flox/+	cHet	Male	04.09.24	6	70	16.87	148.198	6.5	32.5	0.0325	0.21125	0.2	1.34	2	-50	23	BC	L4	GFP
Animal 13	131124RF3	Tg(Nkx2.1-Cre);Syngap1flox/+	cHet	Male	04.09.24	6	70	13.69	132.293	7.26984	34.2	0.0342	0.248629	0.27	1.81	7	-18	26	BC	L4	GFP
Animal 13	131124RF4b	Tg(Nkx2.1-Cre);Syngap1flox/+	cHet	Male	04.09.24	6	70	17	154.086	6.15873	44.4	0.0444	0.273448	0.28	1.85	20	-11	24	BC	L4	GFP
						control	avg	15.8993	99.4211	12.501	64.5129	0.0645129	0.73475	0.415714	2.91929
							sd	3.1244	43.4859	7.68063	38.3702	0.0383702	0.477329	0.2821	2.48741
							se	0.835032	11.6221	2.05273	10.2549	0.0102549	0.127572	0.0753943	0.664788
								16.7343	111.043	14.5538	74.7677	0.0747677	0.862322	0.491109	3.58407
						cHet	avg	13.3445	296.426	6.37983	30.5145	0.0305145	0.189115	0.287273	1.78545
							sd	5.26034	276.092	4.67779	8.37639	0.00837639	0.121324	0.0929614	0.873423
							se	1.58605	83.2449	1.41041	2.52558	0.00252558	0.0365807	0.0280289	0.263347
								14.9306	379.671	7.79024	33.0401	0.0330401	0.225695	0.315302	2.0488
							LMM
							F value	2.161	4.049	3.385	7.506		11.687	1.285	1.779
							p value	0.155	0.056	0.079	0.012		0.002	0.269	0.193
