# Supplementary material for: Syngap1 regulates the synaptic drive and membrane excitability of Parvalbumin-positive interneurons in mouse auditory cortex
Source: eLife. 2025 Aug 14;13:RP97100. doi: 10.7554/eLife.97100 (PMC12352866; doi:10.7554/eLife.97100)
Supplement: Figure 2—source data 1. [file elife-97100-fig2-data1.xlsx]

## Sheet: Sheet1
	Control	cHet	LMM
	(n=16, 7 anim.)	(n=14, 8 anim.)
Failure rate (%)	7.75±2.95	10.57±3.89 pA	F=0.367
			p=0.550
Minimal	32.33±5.61 pA	17.67±2.51 pA	F=5.155
eAMPA			p=0.031*
AUC eAMPA	150.28±20.25 pA x ms	95.86±11.70 pA x ms	F=5.017
			p=0.033*
Onset latencies eAMPA	4.27±0.11 ms (n=101, 7 anim.)	5.07±0.07 ms (n=114, 8 anim.)	F=5.261
			p=0.023*
Rise time eAMPA	0.67±0.13 ms	0.90±0.09 ms (n=13, 7 anim.)	F=2.046
			p=0.177
Decay time eAMPA	3.25±0.71 ms	3.71±0.49 ms (n=13, 7 anim.)	F=0.270
			p=0.608
eNMDA	42.15±13.31 pA (n=6, 3 anim.)	41.73±7.57 pA (n=6, 5 anim.)	F=0.002
			p=0.969
eAMPA in NMDA containing BC	50.51±9.98 pA (n=6, 3 anim.)	14.9±2.37 pA (n=6, 5 anim.)	F=14.455
			p=0.003**
NMDA/AMPA	0.88±0.28 (n=6, 3 anim.)	2.82±0.39 (n=6, 5 anim.)	F=18.876
			p=0.001**
Rise time eNMDA	2.42±0.55 ms (n=6, 3 anim.)	3.90±0.85 ms (n=6, 5 anim.)	F=1.846
			p=0.228
Decay time eNMDA	31.82±3.44 ms (n=6, 3 anim.)	63.33±21.22 ms (n=6, 5 anim.)	F=1.767
			p=0.221
