# Supplementary material for: Syngap1 regulates the synaptic drive and membrane excitability of Parvalbumin-positive interneurons in mouse auditory cortex
Source: eLife. 2025 Aug 14;13:RP97100. doi: 10.7554/eLife.97100 (PMC12352866; doi:10.7554/eLife.97100)
Supplement: Figure 2—source data 2. [file elife-97100-fig2-data2.xlsx]

## Sheet: Evoked AMPA NMDA
	Cell	Mouse line	Genotype	Sex	DOB	Mouse #	Age	EPSC Evoked	EPSCampl (fail. incl), pA	Failure rate, %	Potency (fail. excl), pA	AUC fail incl	AUC Succ only	NMDA/AMPA ratio	Rise time (20-80%) ms	Decay time ms	File	Anatomy
animal 1	130721RF1b	Tg(Nkx2.1-Cre);Syngap1flox/+	Control	M	03.05.21	5	71	AMPA	18.8	0	18.8	50.22	50.22		0.28	1.1	1	BC L4
			Control					NMDA			NMDA absent						2
animal 1	130721RF3	Tg(Nkx2.1-Cre);Syngap1flox/+	Control	M	03.05.21	5	71	AMPA	28.4	20	34.2	128.6	186.3		0.5	2.41	6	BC L4
			Control					NMDA			NMDA absent						7
animal 2	160721RF1b	Tg(Nkx2.1-Cre);Syngap1flox/+	Control	M		552	67	AMPA	16.1	0	19.1	128.3	128.3		1	2.55	2	BC L4
animal 2	160721RF2b	Tg(Nkx2.1-Cre);Syngap1flox/+	Control	M		552	67	AMPA	9	0	7.8	125.2	125.2		2.24	9.53	8	BC L4
animal 2	160721RF3b	Tg(Nkx2.1-Cre);Syngap1flox/+	Control	M		552	67	AMPA	22.6	0	22.6	134.7	134.7		0.72	3.19	13	BC L4
animal 3	010921RF4	Tg(Nkx2.1-Cre);Syngap1flox/+	Control	M		627	68	AMPA	7.8	40	13.6	73.74	82.38	0.860294			13	BC L4
			Control					NMDA	7.4	53	11.7				1.99	25.69	14 and 15
animal 3	010921RF5	Tg(Nkx2.1-Cre);Syngap1flox/+	Control	M		627	68	AMPA	80.5	0	80.5	174.3	174.3	0.701863	0.28	0.89	18	BC L4
			Control					NMDA	56.5	0	56.5				1.26	21.66	20
animal 4	150322RF1	Tg(Nkx2.1-Cre);Syngap1flox/+	Control	M	02.01.22	N122	72	AMPA	26.1	16	30.7	97.31	157.1		0.69	3.55	1	BC L4
animal 4	150322RF4	Tg(Nkx2.1-Cre);Syngap1flox/+	Control	M	02.01.22	N122	72	AMPA	14.6	12	16.3	75.37	84.91		0.41	2.69	11	BC L4
			Control					NMDA			NMDA absent						12
animal 5	210322RF2	Tg(Nkx2.1-Cre);Syngap1flox/+	Control	M	16.01.22	N151	64	AMPA	65.2	0	65.2	304.6	304.6	0.381902	0.47	2.45	3	BC L4
			Control					NMDA	20.2	30	24.9				4.98	39.38	4
animal 5	210322RF4c	Tg(Nkx2.1-Cre);Syngap1flox/+	Control	M	16.01.22	N151	64	AMPA	35.3	0	35.3	118.2	118.2	0.345609	0.49	1.61	12	BC L4
			Control					NMDA	7.5	60	12.2				2.69	27.64	13
animal 6	220322RF1b	Tg(Nkx2.1-Cre);Syngap1flox/+	Control	M	16.01.22	N155	65	AMPA	17.3	0	17.3	52.89	52.89		0.78	3.82	3	BC L4
			Control					NMDA			NMDA absent						4
animal 6	220322RF3	Tg(Nkx2.1-Cre);Syngap1flox/+	Control	M	16.01.22	N155	65	AMPA	65.5	0	65.5	274	274	0.787786	1.26	3.05	9	BC L4
			Control					NMDA	51.6	0	51.6				2.32	43.62	10
animal 6	220322RF4	Tg(Nkx2.1-Cre);Syngap1flox/+	Control	M	16.01.22	N155	65	AMPA	34.5	20	43	111.8	131.4	2.23256	0.3	0.85	16	BC L4
			Control					NMDA	96	0	96				1.33	32.96	17
animal 7	230322RF2b	Tg(Nkx2.1-Cre);Syngap1flox/+	Control	M	16.01.22	N154	66	AMPA	19	16	22.5	270.2	303.4		0.4	10.26	6	BC L4
animal 7	230322RF4	Tg(Nkx2.1-Cre);Syngap1flox/+	Control	M	16.01.22	N154	66	AMPA	56.6	0	56.6	96.66	96.66		0.23	0.87	12	BC L4
			Control					NMDA			NMDA absent						13
animal 8	140721RF4	Tg(Nkx2.1-Cre);Syngap1flox/+	cHet	M	03.05.21	8	72	AMPA	38	0	38	87.43	87.43		0.6	1.49	16	BC L4
			cHet					NMDA			NMDA absent						17
animal 9	150721RF1c	Tg(Nkx2.1-Cre);Syngap1flox/+	cHet	M	03.05.21	6	73	AMPA	5.5	25	7.2	3.96	3.96	2			4	BC L4
			cHet					NMDA	11.1	40	14.4				7.91	27.02	5
animal 9	150721RF3	Tg(Nkx2.1-Cre);Syngap1flox/+	cHet	M	03.05.21	6	73	AMPA	35.6	11	43.9	138.3	171.2		0.51	2.45	12	BC L4
animal 10	020921RF3	Tg(Nkx2.1-Cre);Syngap1flox/+	cHet	M		628	69	AMPA	20.9	0	20.9	110.5	110.5	2.20096	0.79	2.74	14	BC L4
			cHet					NMDA		0	46				1.82	30.39	15
animal 10	020921RF4b	Tg(Nkx2.1-Cre);Syngap1flox/+	cHet	M		628	69	AMPA	8.6	20	11.1	64.81	71.91		0.79	2.74	21	BC L4
animal 11	030921RF1	Tg(Nkx2.1-Cre);Syngap1flox/+	cHet	M		624	70	AMPA	10.5	50	22	52.58	75.67		0.58	2.28	2	BC L4
animal 11	030921RF2	Tg(Nkx2.1-Cre);Syngap1flox/+	cHet	M		624	70	AMPA	13.6	0	13.6	89.57	89.57		1.26	3.82	5	BC L4
			cHet					NMDA			NMDA absent						6
animal 11	030921RF3c	Tg(Nkx2.1-Cre);Syngap1flox/+	cHet	M		624	70	AMPA	10.9	0	10.9	61.09	61.09		1.4	5.4	11	BC L4
			cHet					NMDA		0	49.8			4.56881	3.48	120.64	12
animal 12	100921RF1	Tg(Nkx2.1-Cre);Syngap1flox/+	cHet	M		632	77	AMPA	20.5	10	22.6	183.5	141.3		0.96	3.76	5	BC L4
animal 12	100921RF3b	Tg(Nkx2.1-Cre);Syngap1flox/+	cHet	M		632	77	AMPA	13.8	0	13.8	93.37	93.37	3.02174	0.98	3.84	13	BC L4
			cHet					NMDA		0	41.7				3.43	138.82	14
animal 12	100921RF4b	Tg(Nkx2.1-Cre);Syngap1flox/+	cHet	M		632	77	AMPA	17.8	10	18.2	109.2	116.6		0.83	4.56	22	BC L4
			cHet					NMDA		0	NMDA absent						24
animal 13	210921RF2c	Tg(Nkx2.1-Cre);Syngap1flox/+	cHet	M		716	64	AMPA	14.2	0	14.2	48.76	48.76	2.07746	0.61	1.65	11	BC L4
			cHet					NMDA		0	29.5				2.78	23.97	12
animal 13	210921RF3c	Tg(Nkx2.1-Cre);Syngap1flox/+	cHet	M		716	64	AMPA	22.4	0	22.4	150.7	150.7	3.08036	0.79	6.13	20	BC L4
			cHet					NMDA			69				3.99	39.14	21
animal 14	230921RF1b	Tg(Nkx2.1-Cre);Syngap1flox/+	cHet	M		717	65	AMPA	15.1	22	16	120	120		1.7	7.44	6,7,8	BC L4
			cHet					NMDA			NMDA absent						9
									Minimal eAMPA	Failure rate (%)	eAMPA fail. Excluded	AUC fail. Included	AUC fail. Excluded	NMDA/AMPA ratio	Rise time AMPA	Decay time AMPA	AMPA in Cells containing both AMPA/NMDA	NMDA in Cells containing both AMPA/NMDA	Rise time NMDA	Decay time NMDA
								control	32.3312	7.75	34.3125	138.506	150.285	0.885002	0.67	3.25467	50.5167	42.15	2.42833	31.825
									22.4543	11.8181	21.8186	78.6737	81.0284	0.693334	0.521906	2.87218	24.454	32.6092	1.36782	8.43763
									5.61358	2.95452	5.45466	19.6684	20.2571	0.283053	0.130476	0.718045	9.9833	13.3127	0.558411	3.44465
								cHet	17.6714	10.5714	19.6286	93.8407	95.8614	2.82489	0.907692	3.71538	14.9	41.7333	3.90167	63.33
									9.41941	14.5851	10.261	46.6034	43.806	0.977102	0.353392	1.78104	5.8179	18.5662	2.10078	52.0019
									2.51744	3.89803	2.74237	12.4553	11.7077	0.3989	0.0980133	0.493972	2.37515	7.57961	0.857638	21.2297
								LMM Statistic	5155	0.367	5.297		5.017	18.876	2.046	0.27	14.455	0.002	1.846	1767
									0.031*	0.55	*0.029		0.033*	0.001**	0.177	0.608	0.003**	0.969	0.228	0.221

## Sheet: Onset analysis
			Wt onset latency					cHet onset latency
Animal 1	control	1.3	4.4		Animal 8	cHet	2.3	5.5
Animal 1	control	1.5	4.5		Animal 8	cHet	2.5	5.3
Animal 1	control	1.7	4.7		Animal 8	cHet	2.7	5.4
Animal 1	control	1.3	4.7		Animal 8	cHet	2.3	5.7
Animal 1	control	1.5	4.9		Animal 8	cHet	2.5	5.8
Animal 1	control	1.7	4.5		Animal 8	cHet	2.7	5.4
Animal 1	control	1.3	4.7		Animal 8	cHet	2.3	5.3
Animal 1	control	1.5	4.6		Animal 8	cHet	2.5	5.2
Animal 1	control	1.7	4.5		Animal 8	cHet	2.7	5.3
Animal 1	control	1.3	4.5		Animal 9	cHet	2.3	2.8
Animal 1	control	1.5	6.2		Animal 9	cHet	2.5	3.2
Animal 1	control	1.7	5.8		Animal 9	cHet	2.7	3.2
Animal 1	control	1.3	4.5		Animal 9	cHet	2.3	3.5
Animal 1	control	1.5	4.5		Animal 9	cHet	2.5	3.5
Animal 1	control	1.7	4.5		Animal 9	cHet	2.7	2.9
Animal 1	control	1.3	5		Animal 9	cHet	2.3	2.9
Animal 1	control	1.5	5.7		Animal 9	cHet	2.5	4
Animal 1	control	1.7	5.4		Animal 9	cHet	2.7	4.4
Animal 2	control	1.3	5.3		Animal 9	cHet	2.3	4.4
Animal 2	control	1.5	5.5		Animal 9	cHet	2.5	4.8
Animal 2	control	1.7	5.2		Animal 9	cHet	2.7	4.1
Animal 2	control	1.3	5.4		Animal 9	cHet	2.3	4.1
Animal 2	control	1.5	5.9		Animal 9	cHet	2.5	4.9
Animal 2	control	1.7	5		Animal 10	cHet	2.7	4
Animal 2	control	1.3	5.2		Animal 10	cHet	2.3	4.2
Animal 2	control	1.5	4.4		Animal 10	cHet	2.5	4
Animal 2	control	1.7	3.7		Animal 10	cHet	2.7	4.5
Animal 2	control	1.3	4.4		Animal 10	cHet	2.3	4.7
Animal 2	control	1.5	4.4		Animal 10	cHet	2.5	4.3
Animal 2	control	1.7	4.3		Animal 10	cHet	2.7	4.3
Animal 2	control	1.3	4.3		Animal 10	cHet	2.3	4.3
Animal 2	control	1.5	4.1		Animal 10	cHet	2.5	4.3
Animal 2	control	1.7	3.6		Animal 10	cHet	2.7	4.4
Animal 2	control	1.3	3.8		Animal 10	cHet	2.3	4.8
Animal 2	control	1.5	3.7		Animal 10	cHet	2.5	5
Animal 2	control	1.7	4		Animal 10	cHet	2.7	4.7
Animal 2	control	1.3	3.9		Animal 10	cHet	2.3	4.6
Animal 2	control	1.5	4		Animal 10	cHet	2.5	4.7
Animal 2	control	1.7	3.5		Animal 10	cHet	2.7	4.7
Animal 2	control	1.3	3.6		Animal 10	cHet	2.3	4.7
Animal 3	control	1.5	4.7		Animal 11	cHet	2.5	5.9
Animal 3	control	1.7	4.8		Animal 11	cHet	2.7	5.5
Animal 3	control	1.3	5.3		Animal 11	cHet	2.3	5.9
Animal 3	control	1.5	5.3		Animal 11	cHet	2.5	6.1
Animal 3	control	1.7	4.5		Animal 11	cHet	2.7	5.8
Animal 3	control	1.3	4.5		Animal 11	cHet	2.3	5.2
Animal 3	control	1.5	4.9		Animal 11	cHet	2.5	5.3
Animal 3	control	1.7	4.9		Animal 11	cHet	2.7	5.1
Animal 3	control	1.3	2.1		Animal 11	cHet	2.3	5.3
Animal 3	control	1.5	2.3		Animal 11	cHet	2.5	5.5
Animal 3	control	1.7	2.2		Animal 11	cHet	2.7	5.5
Animal 3	control	1.3	2.1		Animal 11	cHet	2.3	5.5
Animal 3	control	1.5	2.1		Animal 11	cHet	2.5	5.5
Animal 4	control	1.7	3.1		Animal 11	cHet	2.7	5.5
Animal 4	control	1.3	2.9		Animal 11	cHet	2.3	5.9
Animal 4	control	1.5	3		Animal 11	cHet	2.5	5.8
Animal 4	control	1.7	2.8		Animal 11	cHet	2.7	5.8
Animal 4	control	1.3	3		Animal 11	cHet	2.3	6
Animal 4	control	1.5	5		Animal 11	cHet	2.5	6
Animal 4	control	1.7	4.6		Animal 11	cHet	2.7	5.5
Animal 4	control	1.3	4.7		Animal 11	cHet	2.3	5.5
Animal 4	control	1.5	4.7		Animal 11	cHet	2.5	5.3
Animal 4	control	1.7	4.6		Animal 11	cHet	2.7	5.6
Animal 4	control	1.3	4.6		Animal 11	cHet	2.3	6.3
Animal 5	control	1.5	3		Animal 12	cHet	2.5	6.1
Animal 5	control	1.7	2.9		Animal 12	cHet	2.7	6.1
Animal 5	control	1.3	2.8		Animal 12	cHet	2.3	6.7
Animal 5	control	1.5	2.8		Animal 12	cHet	2.5	5.7
Animal 5	control	1.7	2.9		Animal 12	cHet	2.7	6
Animal 5	control	1.3	3		Animal 12	cHet	2.3	6.3
Animal 5	control	1.5	4.2		Animal 12	cHet	2.5	5.3
Animal 5	control	1.7	4.2		Animal 12	cHet	2.7	5.6
Animal 5	control	1.3	4.4		Animal 12	cHet	2.3	5.6
Animal 5	control	1.5	4.7		Animal 12	cHet	2.5	5.2
Animal 5	control	1.7	4.6		Animal 12	cHet	2.7	4.7
Animal 6	control	1.3	3.1		Animal 12	cHet	2.3	4.7
Animal 6	control	1.5	3.7		Animal 12	cHet	2.5	5.3
Animal 6	control	1.7	3.7		Animal 12	cHet	2.7	5.8
Animal 6	control	1.3	3		Animal 12	cHet	2.3	5.6
Animal 6	control	1.5	3.3		Animal 12	cHet	2.5	5.6
Animal 6	control	1.7	5.8		Animal 12	cHet	2.7	5.2
Animal 6	control	1.3	6		Animal 12	cHet	2.3	5.1
Animal 6	control	1.5	6.8		Animal 12	cHet	2.5	4.9
Animal 6	control	1.7	6.3		Animal 12	cHet	2.7	4.8
Animal 6	control	1.3	6.1		Animal 12	cHet	2.3	5.1
Animal 6	control	1.5	6.5		Animal 12	cHet	2.5	5
Animal 6	control	1.7	3.4		Animal 12	cHet	2.7	4.8
Animal 6	control	1.3	4		Animal 12	cHet	2.3	5.3
Animal 6	control	1.5	3.4		Animal 12	cHet	2.5	5.6
Animal 6	control	1.7	3.7		Animal 13	cHet	2.7	5.3
Animal 7	control	1.3	5.6		Animal 13	cHet	2.3	5.6
Animal 7	control	1.5	5.7		Animal 13	cHet	2.5	5.6
Animal 7	control	1.7	5.6		Animal 13	cHet	2.7	5.7
Animal 7	control	1.3	5.9		Animal 13	cHet	2.3	5.8
Animal 7	control	1.5	6.3		Animal 13	cHet	2.5	6
Animal 7	control	1.7	2.4		Animal 13	cHet	2.7	6.2
Animal 7	control	1.3	2.5		Animal 13	cHet	2.3	6.9
Animal 7	control	1.5	2.3		Animal 13	cHet	2.5	4.4
Animal 7	control	1.7	2.4		Animal 13	cHet	2.7	4.2
Animal 7	control	1.3	2.5		Animal 13	cHet	2.3	4.2
					Animal 13	cHet	2.5	4.2
			4.27		Animal 13	cHet	2.7	4
			1.1472		Animal 13	cHet	2.3	4.3
			0.11415		Animal 13	cHet	2.5	4.2
	LMM		5.261		Animal 13	cHet	2.7	4.3
	F value		*0.023		Animal 13	cHet	2.3	4.4
					Animal 14	cHet	2.5	5
					Animal 14	cHet	2.7	4.7
					Animal 14	cHet	2.3	5.3
					Animal 14	cHet	2.5	5.3
					Animal 14	cHet	2.7	5.7
					Animal 14	cHet	2.3	6.7
					Animal 14	cHet	2.5	5.9
								5.07168
								0.826618
								0.0774199

## Sheet: Paired pulse ratio 
	Cell	Mouse Line	Genotype	Sex	DOB	ID	Age		AUC EPSC1 success	Fail. Rate %	Rise Time	Decay Time	Onset EPSC 1	AUC EPSC2 success	Onset EPSC2	Fail. Rate %	Rise time	Decay Time	PPR AUC	File number EPSC	Ra	Current injected	Anatomy	Layer
animal 1	070524RF2a	NKXRCESyngapf/+	control	M	15.02.24	19	82																BC	4
	30								578.6	0	0.48	1.26	1.5	161.6	1.7	0.1	0.65	1.32	0.279295	18	25	40 Pa
	50								128	0	0.41	1.65	1.7	107.8	1.8	0.4	0.66	1.98	0.842187	19	27	52 Pa
	100								92.6	0.6	0.61	1.21	1.9	50.9	1.9	0.5	0.8	2.11	0.549676	20	28	56 Pa
	200
	500
animal 1	070524RF2b	NKXRCESyngapf/+	control	M	15.02.24	19	82																BC	4
	30								273.4	0	1.68	5.02	3.1	241.6	3.1	0	1.22	3.02	0.883687	22	18	18 Pa
	50								274.1	0	0.39	3.02	3	184	3.1	0	0.74	2.58	0.671288	23	20	29 Pa
	100								248.3	0	0.53	1.48	3.1	170.9	3.8	0.15	0.68	2.4	0.68828	24	18	52 Pa
	200								220	0	0.53	2.34	3.4	128	3.8	0.28	0.71	1.92	0.581818	25	19	52 pA
	500								173.6	0	0.48	3.4	3.3	159.4	3.7	0.28	1.92	1.73	0.918203	26	19	69 Pa
animal 2	080524RF1	NKXRCESyngapf/+	control	M	15.02.24	20	83																BC	4
	30								296.9	0	0.63	3.98	5.4	232.7	5.8	0	0.48	4.01	0.783766	2	25	68 Pa
	50								256.5	0	1	3.39	5.7	260	5.5	0.33	0.42	6.96	1.01365	3	24	61 Pa
	100								247.1	0.16	0.45	2.77	5.6	142.4	5.9	0	0.88	4.33	0.576285	4	23	58 Pa
	200								287.1	0.33	1.4	5.25	5.4	152.4	5.7	0.16	0.58	4.12	0.530825	5	22	27 pa
	500								294.5	0.16	0.7	4.8	5.7	63.1	5.9	0.16	1.06	3.49	0.214261	6	21	24 Pa
animal 3	240524RF1	NKXRCESyngapf/+	control	M	08.03.24	8	77																BC	4
	30								703.2	0	2.33	3.95	1.7	823.5	1.9	0	1.53	4.48	1.17108	9	16	74 Pa
	50								808.7	0	2.31	5.54	2.1	851.4	2.1	0	1.75	6.11	1.0528	10	18	71 Pa
	100								784.6	0	2.26	6.43	1.9	908.6	2.1	0	1.78	6.66	1.15804	11	19	58 pA
	200								783.4	0	1.48	6.53	1.9	718.6	1.9	0	1.8	6.88	0.917284	12	19	52 Pa
	500								825.3	0	1.76	5.92	2	597.4	1.9	0	1.55	7.11	0.723858	13	19	50 Pa
animal 4	100724RF1a	NKXRCESyngapf/+	control	M	28.04.24	0	73																BC	4
	30								917	0	0.63	2.18	1.6	472.4	1.6	0	0.48	4.07	0.515158	0	15	plus 7 Pa
	50								945.5	0	0.51	2.46	1.6	476.6	1.6	0	0.43	3.08	0.504072	1	16	2 Pa
	100								841	0	0.58	2.2	1.6	412	1.6	0	0.54	2.32	0.489893	2	17	11 pA
	200								994.3	0	0.56	3.81	1.6	498	1.6	0	0.6	3.98	0.500855	3	17	21 Pa
	500								1164.5	0	0.59	4.57	1.6	513.8	1.7	0	0.32	4.86	0.441219	4	17	30 pA
animal 4	100724RF3a	NKXRCESyngapf/+	control	M	28.04.24	0	73																BC	4
	30								1491.9	0	0.68	4.22	2.1	1830.6	2	0	0.56	6.41	1.22703	25	21	9 Pa
	50								2076.2	0	0.72	4.92	1.9	2270.9	2	0	0.68	5.5	1.09378	26	21	9 Pa
	100								2117.8	0	1.01	4.93	2	2291.2	2	0	0.94	4.18	1.08188	27	21	14 Pa
	200								2919.7	0	1.16	4.25	2	2607.1	2.1	0	0.89	3.78	0.892934	28	21	12 Pa
	500								3280.1	0	0.99	3.96	2	2137.6	2	0	0.98	3.48	0.651687	29	21	16 pA
animal 5	120724RF1a	NKXRCESyngapf/+	control	M	28.04.24	2	75																BC	4
	30								1594	0	0.49	5.14	1.8	926.1	1.8	0	0.52	3.59	0.580991	1	26	10 Pa
	50								1646	0	0.49	6.15	1.7	1098.9	1.7	0	0.62	6.37	0.667618	2	27	10 pA
	100								1407.6	0	0.68	7.28	1.6	1015.7	1.7	0	0.63	6.01	0.721583	3	26	25 Pa
	200								1154.5	0	0.56	4.36	1.7	764	1.7	0	0.49	3.79	0.661758	4	25	42 Pa
	500								1274.6	0	0.52	2.62	1.6	1022.7	1.6	0	0.62	2.6	0.802369	5	25	49 Pa
animal 5	120724RF2	NKXRCESyngapf/+	control	M	28.04.24	2	75																BC	4
	30								483.5	0	0.46	3.18	1.8	540.7	1.6	0	0.55	3.09	1.1183	8	26	7 Pa
	50								434	0	0.41	2.95	1.6	534	1.5	0	0.47	3.62	1.23041	9	26	8 Pa
	100								444.4	0	0.52	2.99	1.6	399.5	1.8	0	0.4	3.57	0.898965	10	29	13 Pa
	200								376.8	0	0.47	4.71	1.8	375.7	1.9	0	0.57	3.8	0.997081	11	31	16 Pa
	500								455.5	0	1.08	6.11	1.8	297.6	2	0	0.49	4.52	0.653348	12	32	21 pA
animal 5	120724RF3b	NKXRCESyngapf/+	control	M	28.04.24	2	75																BC	4
	30								759.2	0	0.34	2.95	2.1	565	1.9	0	0.6	3.22	0.744204	23	19	23 Pa
	50								653.5	0	0.55	2.76	1.9	563.8	2	0	0.63	4.05	0.862739	24	20	93 Pa
	100								525.7	0	0.68	3.77	1.8	654.6	2.1	0	0.56	2.73	1.2452	25	23	21 pA
	200								516.3	0	0.7	3.06	2	523.5	2.1	0	0.56	3.25	1.01395	26	24	7 Pa
	500								487	0	0.67	3.39	1.9	387.2	2	0	0.56	2.66	0.795072	27	23	9 Pa
animal 6	270524RF2b	NKXRCESyngapf/+	cHet	M	08.03.24	1	80																BC	4
	30								1209.7	0	1.19	2.81	1.9	961.8	1.8	0	0.74	4.45	0.795073	9	20	50 Pa
	50								1419.1	0	0.9	4.98	1.9	1286.4	1.7	0	0.97	4.13	0.90649	10	19	53 Pa
	100								1264.1	0	0.92	5.12	1.7	1169.1	1.9	0	1.17	4.6	0.924848	11	19	44 Pa
	200								1105.2	0	0.84	7.99	1.8	911.5	1.7	0	0.95	7.53	0.824738	12	21	31 Pa
	500								942.1	0	0.77	6.13	1.9	756.6	1.7	0	0.95	7.02	0.803099	13	22	31 pA
animal 6	270524RF3b	NKXRCESyngapf/+	cHet	M	08.03.24	1	80																BC	4
	30								1307.4	0	2.24	3.05	2.4	3145.4	2.4	0	1.77	5.62	2.40584	29	20	42 Pa
	50								2063.1	0	2.32	3.27	2.5	3497.8	2.5	0	1.75	7.13	1.69541	30	21	37 Pa
	100								2253.9	0	2.35	4.71	2.6	2153.7	2.5	0	2.09	4.63	0.955544	31	22	33 Pa
	200								2519.2	0	2.26	4.77	2.3	2285.3	2.5	0	2.3	5.03	0.907153	32	23	35 Pa
	500								4365.7	0	1.96	5.78	2.2	2764	2.5	0	1.88	6	0.633117	33	26	45 Pa
animal 7	100624RF2	NKXRCESyngapf/+	cHet	M	05.04.24	3	66																BC	4
	30								1073	0	0.82	3.02	2.5	905.2	2.4	0	0.81	4.53	0.843616	20	20	38 Pa
	50								1218.1	0	0.48	3.71	2.5	817.2	2.4	0	0.77	5.53	0.670881	21	21	28 Pa
	100								1008	0	0.63	5.03	2.5	836.1	2.5	0	1	5.42	0.829464	22	23	29 pA
	200								880.2	0	0.85	4.81	2.6	655.6	2.5	0	1.08	7.49	0.744831	23	24	200 Pa
	500																			24
animal 8	130624RF1a	NKXRCESyngapf/+	cHet	M	05.04.24	4	69																BC	4
	30								913.7	0	0.91	6.55	2.1	751.4	2.3	0	1.26	8.66	0.822371	4	20	32 Pa
	50								1226.9	0	0.99	9.48	2.2	1344.5	2.2	0	1.04	10.01	1.09585	5	20	34 Pa
	100								1679.6	0	0.8	11.85	2.3	1494.5	2.4	0	1.22	12.37	0.889795	6	19	39 Pa
	200								1800.8	0	1.16	9.44	2.3	1427.9	2.4	0	1.07	11.4	0.792925	7	18	36 Pa
	500								1986.9	0	1.2	10.67	2.3	1478.9	2.3	0	1.54	10.17	0.744325	8	17	33 pA
animal 9	090724RF1	NKXRCESyngapf/+	cHet	M	28.04.24	1	72																BC	4
	30								355.2	0	0.71		2.2	346.9	2	0.2	1.1		0.976633	0	23	72 Pa
	50								1793	0	1.08	3.74	2.4	1665.1	2.3	0	1.39	4.39	0.928667	1	27	54 Pa
	100								95.4	0	0.61	2.93	2.3	154.8	2.2	0.3	0.84	3.04	1.62264	2	28	70 Pa
	200
	500
animal 9	090724RF2a	NKXRCESyngapf/+	cHet	M	28.04.24	1	72																BC	4
	30								1977.3	0	0.83	7.52	3	3235.1	2.6	0	1	7.61	1.63612	7	22	plus 10 Pa
	50								2304.2	0	0.86	5.65	2.8	3308	2.5	0	1.07	7.01	1.43564	8	23	0 Pa
	100								2182.2	0	0.83	5.76	2.9	2815.7	2.9	0	0.92	5.07	1.2903	9	22	0 pA
	200								1920.1	0	0.9	5.14	3	1825.4	2.8	0	1	4.72	0.95068	10	23	Plus 6 Pa
	500								1523.8	0	1.05	4.45	2.9	1582.2	3	0	0.79	5.02	1.03833	11	22	plus 1 pA
animal 10	110724RF1a	NKXRCESyngapf/+	cHet	M	28.04.24	3	74																BC	4
	30								1592.1	0	2.3	3.4	2.9	1693.7	2.9	0	2.47	3.94	1.06382	4	26	20 Pa
	50								2270.5	0	2.66	4.35	2.6	2089.7	2.7	0	2.6	4.44	0.92037	5	24	7 Pa
	100								2680.9	0	2.28	4.78	2.6	2377	2.7	0	2.7	3.98	0.886643	6	26	6 Pa
	200								2766.9	0	2.39	4.55	2.8	1967	2.9	0	2.6	4.64	0.710904	7	24	7 pA
	500								2588	0	2.68	4.37	2.9	1535	3.2	0	2.92	4.51	0.593122	8	29	8 Pa
animal 10	110724RF2	NKXRCESyngapf/+	cHet	M	28.04.24	3	74																BC	4
	30								372.6	0	1.56	5.33	2.4	1074.9	2.3	0	1.34	7.77	2.88486	16	17	70 Pa
	50								358.4	0	1.32	8.03	2.4	1465.2	2.2	0	1.82	5.26	4.08817	17	16	60 Pa
	100								475.4	0	1.95	5.88	2.4	984.5	2.3	0	2.04	5.3	2.07089	18	17	54 Pa
	200								300.7	0	1.56	3.98	2.3	595.2	2.6	0	1.61	4.85	1.97938	19	17	56 Pa
	500								292.1	0	1.57	4.58	2.4	259.8	2.6	0	1.47	5.82	0.889421	20	16	48 Pa
									AUC EPSC1 success	Fail. Rate %	Rise Time	Decay Time	Onset EPSC 1	AUC EPSC2 success	Onset EPSC2	Fail. Rate %	Rise time	Decay Time	PPR AUC
								AVG 30 ms interval control	788.633	0	0.857778	3.54222	2.34444	643.8	2.37778	0.0111111	0.732222	3.69	0.811501
									475.964	0	0.678524	1.27966	1.24007	515.992	1.36178	0.0333333	0.376456	1.36592	0.322255
									158.655	0	0.226175	0.426552	0.413357	171.997	0.453927	0.0111111	0.125485	0.455308	0.107418
									947.288	0	1.08395	3.96877	2.7578	815.797	2.8317	0.0222222	0.857708	4.14531	0.918919
								AVG 30 ms stimulus cHet	1100.12	0	1.32	4.52571	2.425	1514.3	2.3375	0.025	1.31125	6.08286	1.42854
									558.843	0	0.644936	1.93072	0.377018	1099.87	0.337797	0.0707107	0.570174	1.90193	0.807747
									197.581	0	0.228019	0.682614	0.133296	388.863	0.119429	0.025	0.201587	0.672433	0.285582
									1297.71	0	1.54802	5.20833	2.5583	1903.16	2.45693	0.05	1.51284	6.75529	1.71412
								AVG 50 stimulus control	802.5	0	0.754444	3.64889	2.35556	705.267	2.36667	0.0811111	0.711111	4.47222	0.88206
									665.635	0	0.614697	1.5247	1.32675	666.717	1.26491	0.161898	0.406277	1.80844	0.236614
									221.878	0	0.204899	0.508233	0.442252	222.239	0.421637	0.0539662	0.135426	0.602815	0.0788714
									1024.38	0	0.959344	4.15712	2.79781	927.506	2.7883	0.135077	0.846537	5.07504	0.960932
								AVG 50 ms stimulus cHet	1581.66	0	1.32625	5.40125	2.4125	1934.24	2.3125	0	1.42625	5.9875	1.46768
									660.501	0	0.761145	2.23777	0.26959	975.691	0.299702	0	0.604009	1.98807	1.10828
									233.523	0	0.269105	0.791171	0.0953143	344.959	0.105961	0	0.213549	0.702889	0.391837
									1815.19	0	1.59536	6.19242	2.50781	2279.2	2.41846	0	1.6398	6.69039	1.85952
								AVG 100 ms stimulus control	745.456	0.0844444	0.813333	3.67333	2.34444	671.756	2.54444	0.0722222	0.801111	3.81222	0.823311
									651.258	0.200444	0.565818	2.13683	1.30586	694.21	1.41872	0.167912	0.405415	1.64666	0.282458
									217.086	0.0668147	0.188606	0.712275	0.435288	231.403	0.472908	0.0559707	0.135138	0.548887	0.0941527
									962.542	0.151259	1.00194	4.38561	2.77973	903.159	3.01735	0.128193	0.936249	4.36111	0.917464
								AVG 100 ms stimulus cHet	1454.94	0	1.29625	5.7575	2.4125	1498.17	2.425	0.0375	1.4975	5.55125	1.18377
									907.486	0	0.758343	2.6218	0.34821	890.673	0.305894	0.106066	0.685456	2.86197	0.448856
									302.495	0	0.252781	0.873932	0.11607	296.891	0.101965	0.0353553	0.228485	0.95399	0.149619
									1757.43	0	1.54903	6.63143	2.52857	1795.07	2.52696	0.0728553	1.72599	6.50524	1.33338
								AVG 200 stimulus control	906.513	0.04125	0.8575	4.28875	2.475	720.913	2.6	0.055	0.775	3.94	0.762063
									880.35	0.116673	0.419617	1.29106	1.31013	796.613	1.43128	0.106771	0.431972	1.3785	0.21519
									311.251	0.04125	0.148357	0.456459	0.463199	281.645	0.506035	0.0377492	0.152725	0.487373	0.0760813
									1217.76	0.0825	1.00586	4.74521	2.9382	1002.56	3.10604	0.0927492	0.927725	4.42737	0.838144
								AVG 200 ms stimulus cHet	1613.3	0	1.42286	5.81143	2.44286	1381.13	2.48571	0	1.51571	6.52286	0.98723
									894.357	0	0.666501	2.05736	0.395209	673.914	0.389138	0	0.679972	2.50196	0.445605
									338.035	0	0.251914	0.777608	0.149375	254.716	0.14708	0	0.257005	0.945651	0.168423
									1951.34	0	1.67477	6.58904	2.59223	1635.84	2.63279	0	1.77272	7.46851	1.15565
								AVG 500 ms stimulus control	994.388	0.02	0.84875	4.34625	2.4875	647.35	2.6	0.055	0.9375	3.80625	0.650002
									1005.12	0.0565685	0.425758	1.2411	1.40655	670.981	1.48709	0.106771	0.558333	1.68272	0.225237
									355.365	0.02	0.150528	0.438797	0.497292	237.228	0.525765	0.0377492	0.197401	0.594931	0.0796333
									1349.75	0.04	0.999278	4.78505	2.98479	884.578	3.12576	0.0927492	1.1349	4.40118	0.729636
								AVG 500 ms stimulus cHet	1949.77	0	1.53833	5.99667	2.43333	1396.08	2.55	0	1.59167	6.42333	0.783568
									1427.6	0	0.696489	2.40624	0.39833	852.299	0.531977	0	0.764131	2.02815	0.165489
									582.814	0	0.28434	0.982343	0.162617	347.95	0.217179	0	0.311955	0.827988	0.0675605
									2532.58	0	1.82267	6.97901	2.59595	1744.03	2.76718	0	1.90362	7.25132	0.851129
																			Two way ANOVA for PPR AUC p=0.001**
