# Supplementary material for: Syngap1 regulates the synaptic drive and membrane excitability of Parvalbumin-positive interneurons in mouse auditory cortex
Source: eLife. 2025 Aug 14;13:RP97100. doi: 10.7554/eLife.97100 (PMC12352866; doi:10.7554/eLife.97100)
Supplement: Figure 3—source data 1. [file elife-97100-fig3-data1.xlsx]

## Sheet: Sheet1
	Control	cHet	LMM
	(n=25, 8 anim.)	(n=24, 7 anim.)
sIPSC ampl.	25.15±1.39 pA	19.59±1.07 pA	F=5.229
			p=0.009*
AUC sIPSC	136.83±9.71 pA x ms	120.42±8.74 pA x ms	F=0.976
			p=0.385
sIPSC time interval	140.34±19.82 ms	101.61±13.01 ms	F=1.994
			p=0.185
ΔQ * f sIPSC	1.31±0.17	1.53±0.15	F=0.538
			p=0.587
sIPSC rise time	0.39±0.02 ms	0.48±0.04 ms	F=1.450
			p=0.262
sIPSC decay time	4.31±0.39 ms	4.07±0.26 ms	F=0.1.88
			p=0.831
mIPSC ampl.	21.55±1.08 pA	19.38±1.25 pA	F=1.726
			p=0.195
AUC mIPSC	127.89±9.56 pA x ms	133.35±10.26 pA x ms	F=0.120
			p=0.374
mIPSC time interval	106.44±10.43 ms	101.44±14.49 ms	F=0.115
			p=0.739
Quantal content	1.19±0.05	1.06±0.05	F=3.077
			p=0.086
ΔQ * f mIPSC	1.43±0.14	2.02±0.34	F=2.809
			p=0.100
mIPSC rise time	0.38±0.01 ms	0.49±0.03 ms	F=2.907
			p=0.103
mIPSC decay time	4.45±0.36 ms	4.94±0.35 ms	F=0.293
			p=0.597
