# Supplementary material for: Syngap1 regulates the synaptic drive and membrane excitability of Parvalbumin-positive interneurons in mouse auditory cortex
Source: eLife. 2025 Aug 14;13:RP97100. doi: 10.7554/eLife.97100 (PMC12352866; doi:10.7554/eLife.97100)
Supplement: Figure 3—source data 2. [file elife-97100-fig3-data2.xlsx]

## Sheet: sIPSC BC L4
	Cell	Mouse line	Genotype	Sex	DOB	Mouse #	Age	Amplitude	Frequency	Inter Event interval	AUC	AUC/1000	AUC x Freq	Rise	Decay	File	Current injected	Ra	Anatomy	Layer	Tag
animal 1	200122RF2	Nkx2.1cre RCE Syngap1 flox	control	M	29.10.21	M684	83	28.99	10.7333	28.9958	94.53	0.09453	1.01462	0.32	2.42	3	780	11	BC	4	GFP
animal 1	200122RF3	Nkx2.1cre RCE Syngap1 flox	control	M	29.10.21	M684	83	19.9136	5.64167	174.583	114.3	0.1143	0.644842	0.42	4.16	5	450	10	BC	4	GFP
animal 1	200122RF4	Nkx2.1cre RCE Syngap1 flox	control	M	29.10.21	M684	83	30.49	14.9583	66.5398	104.4	0.1044	1.56165	0.32	2.66	7	400	11	BC	4	GFP
animal 2	210122RF1	Nkx2.1cre RCE Syngap1 flox	control	M	29.10.21	M685	84	19.0469	9.80833	101.27	223.4	0.2234	2.19118	0.63	7.54	0	200	12	BC	4	GFP
animal 2	210122RF3	Nkx2.1cre RCE Syngap1 flox	control	M	29.10.21	M685	84	15.9899	3.00833	323.563	166.2	0.1662	0.499985	0.72	9.78	4	100	14	BC	4	GFP
animal 2	210122RF5	Nkx2.1cre RCE Syngap1 flox	control	M	29.10.21	M685	84	23.449	7.60833	130.493	64.88	0.06488	0.493629	0.3	2.09	8	800	10	BC	4	GFP
animal 3	250122RF1	Nkx2.1cre RCE Syngap1 flox	control	M	29.10.21	M691	88	35.6436	29.1917	34.145	114.1	0.1141	3.33077	0.28	2.74	0	200		BC	4	GFP
animal 3	250122RF2	Nkx2.1cre RCE Syngap1 flox	control	M	29.10.21	M691	88	23.7731	9.51667	104.128	78.1	0.0781	0.743252	0.31	2.37	2	300	9	BC	4	GFP
animal 3	250122RF3b	Nkx2.1cre RCE Syngap1 flox	control	M	29.10.21	M691	88	40.2973	16.15	61.5745	176.4	0.1764	2.84886	0.32	2.39	5	300	11	BC	4	GFP
animal 3	250122RF4	Nkx2.1cre RCE Syngap1 flox	control	M	29.10.21	M691	88	20.1798	8.775	113.143	91.5	0.0915	0.802913	0.34	3.61	7	300	11	BC	4	GFP
animal 3	250122RF5	Nkx2.1cre RCE Syngap1 flox	control	M	29.10.21	M691	88	23.017	3.3	301.203	139	0.139	0.4587	0.38	3.64	9	400	10	BC	4	GFP
animal 4	040222RF2	Nkx2.1cre RCE Syngap1 flox	control	M	24.11.21	N14	83	20.09	4.71667	207.886	143.8	0.1438	0.678257	0.44	5.71	2	200		BC	4	GFP
animal 5	070222RF2	Nkx2.1cre RCE Syngap1 flox	control	M	24.11.21	N15	86	17.57	2.19167	446.053	167	0.167	0.366008	0.45	6.65	2	220	10	BC	4	GFP
animal 5	070222RF4	Nkx2.1cre RCE Syngap1 flox	control	M	24.11.21	N15	86	39.91	10.5083	94.7366	173	0.173	1.81794	0.33	3.54	6	300	12	BC	4	GFP
animal 6	020522RF1	Nkx2.1cre RCE Syngap1 flox	control	M	17.02.22	3	74	22.0201	14.35	69.344	122.4	0.1224	1.75644	0.34	3.05	0	300	14	BC	4	GFP
animal 6	020522RF2	Nkx2.1cre RCE Syngap1 flox	control	M	17.02.22	3	74	32.806	28.1833	35.3295	125.4	0.1254	3.53419	0.34	3.84	2	200	14	BC	4	GFP
animal 6	020522RF3	Nkx2.1cre RCE Syngap1 flox	control	M	17.02.22	3	74	26.7446	7.98333	123.991	127.3	0.1273	1.01628	0.35	3.55	4	200	13	BC	4	GFP
animal 6	020522RF4	Nkx2.1cre RCE Syngap1 flox	control	M	17.02.22	3	74	21.7768	8.45	117.732	157.5	0.1575	1.33087	0.38	4.88	6	260	14	BC	4	GFP
animal 6	020522RF5	Nkx2.1cre RCE Syngap1 flox	control	M	17.02.22	3	74	28.4666	13.9917	71.3268	110	0.11	1.53908	0.32	2.96	8	260	14	BC	4	GFP
animal 7	030522RF1	Nkx2.1cre RCE Syngap1 flox	control	M	28.02.22	2	64	24.448	10.9	91.6204	121.2	0.1212	1.32108	0.35	3.46	0	290	12	BC	4	GFP
animal 7	030522RF2	Nkx2.1cre RCE Syngap1 flox	control	M	28.02.22	2	64	15.8065	12.0833	82.5109	93.06	0.09306	1.12448	0.36	4.5	2	390	11	BC	4	GFP
animal 7	030522RF3	Nkx2.1cre RCE Syngap1 flox	control	M	28.02.22	2	64	27.6917	5.625	175.734	136	0.136	0.765	0.35	3.65	4	350	13	BC	4	GFP
animal 7	030522RF4	Nkx2.1cre RCE Syngap1 flox	control	M	28.02.22	2	64	23.9419	5.14167	192.137	153	0.153	0.786675	0.46	6.53	6	190	13	BC	4	GFP
animal 8	170522RF1	Nkx2.1cre RCE Syngap1 flox	control	M	11.03.22	1	67	30.2369	4.71667	207.991	297.3	0.2973	1.40227	0.43	7.19	0	320	13	BC	4	GFP
animal 8	170522RF4	Nkx2.1cre RCE Syngap1 flox	control	M	11.03.22	1	67	16.3501	6.5	152.42	126.9	0.1269	0.82485	0.42	4.72	6	150	16	BC	4	GFP
animal 9	290422RF1	Nkx2.1cre RCE Syngap1 flox	cHet	M	17.02.22	4	71	25.3171	11.4833	86.6808	110.6	0.1106	1.27006	0.33	3.78	0	230	12	BC	4	GFP
animal 9	290422RF3	Nkx2.1cre RCE Syngap1 flox	cHet	M	17.02.22	4	71	14.3868	7.6	130.587	91.79	0.09179	0.697604	0.31	4.71	4	130	13	BC	4	GFP
animal 9	290422RF4	Nkx2.1cre RCE Syngap1 flox	cHet	M	17.02.22	4	71	21.804	12.9417	76.544	123.1	0.1231	1.59312	0.41	4.16	6	287	12	BC	4	GFP
animal 10	040522RF2	Nkx2.1cre RCE Syngap1 flox	cHet	M	28.02.22	0	65	33.6708	24.1333	41.3707	129.9	0.1299	3.13492	0.35	3.63	2	175	13	BC	4	GFP
animal 10	040522RF3	Nkx2.1cre RCE Syngap1 flox	cHet	M	28.02.22	0	65	16.066	14.2833	69.8773	129.5	0.1295	1.84969	0.44	5.96	4	240	14	BC	4	GFP
animal 10	040522RF4	Nkx2.1cre RCE Syngap1 flox	cHet	M	28.02.22	0	65	18.826	36.525	27.3223	56.39	0.05639	2.05964	0.32	2.28	6	470	12	BC	4	GFP
animal 10	040522RF5	Nkx2.1cre RCE Syngap1 flox	cHet	M	28.02.22	0	65	31.037	17.2083	58.0118	143.8	0.1438	2.47456	0.34	3.51	8	320	12	BC	4	GFP
animal 10	040522RF6	Nkx2.1cre RCE Syngap1 flox	cHet	M	28.02.22	0	65	19.0737	10.475	95.2209	136.5	0.1365	1.42984	0.38	4.64	10	270	13	BC	4	GFP
aniaml 11	050522RF1	Nkx2.1cre RCE Syngap1 flox	cHet	M	28.02.22	0	66	18.4299	11.8083	84.3885	121.5	0.1215	1.43471	0.39	4.44	0	250	13	BC	4	GFP
animal 11	050522RF2	Nkx2.1cre RCE Syngap1 flox	cHet	M	28.02.22	0	66	15.3832	3.94167	250.45	87.4	0.0874	0.344502	0.57	3	2	320	14	BC	4	GFP
animal 12	180522RF1	Nkx2.1cre RCE Syngap1 flox	cHet	M	11.03.22	3	68	16.194	34.775	28.7307	80.4	0.0804	2.79591	0.38	2.53	0	560	10	BC	4	GFP
animal 12	180522RF3	Nkx2.1cre RCE Syngap1 flox	cHet	M	11.03.22	3	68	16.3315	20.0833	49.6115	69.32	0.06932	1.39218	0.33	3.5	4	210	14	BC	4	GFP
animal 12	180522RF4	Nkx2.1cre RCE Syngap1 flox	cHet	M	11.03.22	3	68	24.7406	9.88333	100.952	208.5	0.2085	2.06067	0.53	6.08	6	180	15	BC	4	GFP
animal 12	180522RF5	Nkx2.1cre RCE Syngap1 flox	cHet	M	11.03.22	3	68	14.5778	25.05	39.8121	47.74	0.04774	1.19589	0.3	2.2	8	255	13	BC	4	GFP
animal 13	041022RF3	Nkx2.1cre RCE Syngap1 flox	cHet	M	13.06.22	0	81	11.6166	8.41667	117.416	87.61	0.08761	0.737384	0.6	3.88	4	110	14	BC	4	GFP
animal 14	181022RF1	Nkx2.1cre RCE Syngap1 flox	cHet	M	01.08.22	3	78	15.6036	8.31667	119.026	112.2	0.1122	0.93313	0.5	4.33	0	140	15	BC	4	GFP
animal 14	181022RF2	Nkx2.1cre RCE Syngap1 flox	cHet	M	01.08.22	3	78	23.8083	4.46667	221.741	236.6	0.2366	1.05681	1.14	6.94	2	170	15	BC	4	GFP
animal 14	181022RF4	Nkx2.1cre RCE Syngap1 flox	cHet	M	01.08.22	3	78	21.4188	6.75	146.932	162.2	0.1622	1.09485	0.62	4.25	6	290	13	BC	4	GFP
animal 14	181022RF5	Nkx2.1cre RCE Syngap1 flox	cHet	M	01.08.22	3	78	17.1672	6.5	151.729	135.5	0.1355	0.88075	0.6	4.53	9	230	15	BC	4	GFP
animal 14	181022RF6	Nkx2.1cre RCE Syngap1 flox	cHet	M	01.08.22	3	78	16.2851	20.9667	47.5505	121.4	0.1214	2.54535	0.52	3.13	11	370	15	BC	4	GFP
animal 15	191022RF2	Nkx2.1cre RCE Syngap1 flox	cHet	M	01.08.22	2	79	21.2861	7.85833	126.106	157.8	0.1578	1.24005	0.5	3.3	3	165	14	BC	4	GFP
animal 15	191022RF3	Nkx2.1cre RCE Syngap1 flox	cHet	M	01.08.22	2	79	23.1487	22.2667	44.7222	125.9	0.1259	2.80337	0.45	2.84	5	275	14	BC	4	GFP
animal 15	191022RF5	Nkx2.1cre RCE Syngap1 flox	cHet	M	01.08.22	2	79	15.5738	3.95	249.07	132.7	0.1327	0.524165	0.8	6.76	9	145	13	BC	4	GFP
animal 15	191022RF6	Nkx2.1cre RCE Syngap1 flox	cHet	M	01.08.22	2	79	18.3498	13.3583	74.6843	81.8	0.0818	1.09271	0.52	3.36	11	270	13	BC	4	GFP
						control	AVG	25.146	10.1613	140.338	136.827	0.136827	1.31415	0.3864	4.3052
							SD	6.94836	6.77013	99.1017	48.5579	0.0485579	0.869132	0.100784	1.93218
							SE	1.38967	1.35403	19.8203	9.71158	0.00971158	0.173826	0.0201567	0.386436
						cHet	AVG	19.5874	14.2934	101.606	120.423	0.120423	1.52674	0.484583	4.0725
							SD	5.22619	8.92975	63.7224	42.8358	0.0428358	0.758757	0.183682	1.27389
							SE	1.06679	1.82278	13.0073	8.74381	0.00874381	0.154881	0.0374939	0.260031
						LMM Statistic
						F value		5.229	1.402	1.994	0.976		0.538	1.45	0.188
						p value		*0.009	0.276	0.185	0.385		0.587	0.262	0.831

## Sheet: mIPSC BC L4
	Cell	Mouse line	Genotype	Sex	DOB	Mouse #	Age	Amplitude	Frequency	Inter Event interval	AUC	AUC/1000	AUC x Freq	Rise	Decay	File	Current injected	Ra	Anatomy	Layer	Tag
animal 1	200122RF2	Nkx2.1cre RCE Syngap1 flox	control	M	29.10.21	M684	83	20.6754	24.15	41.3306	90.85	0.09085	2.19403	0.35	2.7	4	740	11	BC	4	GFP
animal 1	200122RF3	Nkx2.1cre RCE Syngap1 flox	control	M	29.10.21	M684	83	13.8629	6.14167	161.746	78.94	0.07894	0.484823	0.42	4.77	6	400	11	BC	4	GFP
animal 1	200122RF4	Nkx2.1cre RCE Syngap1 flox	control	M	29.10.21	M684	83	25.1232	23.9583	41.6597	94.64	0.09464	2.26742	0.34	2.49	8	350	10	BC	4	GFP
animal 2	210122RF1	Nkx2.1cre RCE Syngap1 flox	control	M	29.10.21	M685	84	17.4865	6.25	158.451	165.8	0.1658	1.03625	0.48	6.85	1	235	12	BC	4	GFP
animal 2	210122RF3	Nkx2.1cre RCE Syngap1 flox	control	M	29.10.21	M685	84	21.5627	7.24167	137.486	218.2	0.2182	1.58013	0.48	8.29	5	95	11	BC	4	GFP
animal 2	210122RF5	Nkx2.1cre RCE Syngap1 flox	control	M	29.10.21	M685	84	18.4623	16.5167	60.3215	55.63	0.05563	0.918822	0.3	2.06	9	850	10	BC	4	GFP
animal 3	250122RF1	Nkx2.1cre RCE Syngap1 flox	control	M	29.10.21	M691	88	21.6494	38	26.2443	69.64	0.06964	2.64632	0.27	2.57	1	150		BC	4	GFP
animal 3	250122RF2	Nkx2.1cre RCE Syngap1 flox	control	M	29.10.21	M691	88	16.8527	22.375	44.6419	75.81	0.07581	1.69625	0.28	2.27	3	250	10	BC	4	GFP
animal 3	250122RF3b	Nkx2.1cre RCE Syngap1 flox	control	M	29.10.21	M691	88	24.7252	14.05	70.7629	96.58	0.09658	1.35695	0.27	2.36	6	300	11	BC	4	GFP
animal 3	250122RF4	Nkx2.1cre RCE Syngap1 flox	control	M	29.10.21	M691	88	15.9332	9.89167	100.141	78.59	0.07859	0.777386	0.31	3.28	8	265	11	BC	4	GFP
animal 3	250122RF5	Nkx2.1cre RCE Syngap1 flox	control	M	29.10.21	M691	88	25.2376	4.74167	209.183	161.9	0.1619	0.767676	0.35	3.85	10	360	8	BC	4	GFP
animal 4	040222RF2	Nkx2.1cre RCE Syngap1 flox	control	M	24.11.21	N14	83	17.7618	5.21667	189.93	161.7	0.1617	0.843535	0.45	6.5	3	145	10	BC	4	GFP
animal 5	070222RF2	Nkx2.1cre RCE Syngap1 flox	control	M	24.11.21	N15	86	19.8893	7.225	137.002	168.5	0.1685	1.21741	0.49	5.77	3	220	11	BC	4	GFP
animal 5	070222RF4	Nkx2.1cre RCE Syngap1 flox	control	M	24.11.21	N15	86	37.4418	15.15	65.8079	187.2	0.1872	2.83608	0.34	3.82	7	290	12	BC	4	GFP
animal 6	020522RF1	Nkx2.1cre RCE Syngap1 flox	control	M	17.02.22	3	74	24.6599	12.8833	77.0141	132.4	0.1324	1.70575	0.31	2.56	1	235	11	BC	4	GFP
animal 6	020522RF2	Nkx2.1cre RCE Syngap1 flox	control	M	17.02.22	3	74	22.9801	21.1833	47.0507	117.9	0.1179	2.49751	0.36	4.28	3	175	15	BC	4	GFP
animal 6	020522RF3	Nkx2.1cre RCE Syngap1 flox	control	M	17.02.22	3	74	27.4011	10.9083	91.3675	144.2	0.1442	1.57298	0.37	4.2	5	179	13	BC	4	GFP
animal 6	020522RF4	Nkx2.1cre RCE Syngap1 flox	control	M	17.02.22	3	74	28.8871	13.7917	72.2322	189.7	0.1897	2.61628	0.46	5.57	7	285	14	BC	4	GFP
animal 6	020522RF5	Nkx2.1cre RCE Syngap1 flox	control	M	17.02.22	3	74	16.2799	9.375	105.924	123.8	0.1238	1.16063	0.38	4.89	9	400	11	BC	4	GFP
animal 7	030522RF1	Nkx2.1cre RCE Syngap1 flox	control	M	28.02.22	2	64	22.1758	9.44167	105.391	129.4	0.1294	1.22175	0.38	4.79	1	200	12	BC	4	GFP
animal 7	030522RF2	Nkx2.1cre RCE Syngap1 flox	control	M	28.02.22	2	64	14.9261	9.14167	109.006	70.43	0.07043	0.643848	0.34	4.98	3	320	12	BC	4	GFP
animal 7	030522RF3	Nkx2.1cre RCE Syngap1 flox	control	M	28.02.22	2	64	25.3996	8.24167	120.253	123.8	0.1238	1.02032	0.37	3.62	5	315	13	BC	4	GFP
animal 7	030522RF4	Nkx2.1cre RCE Syngap1 flox	control	M	28.02.22	2	64	24.1601	6.49167	153.273	144.3	0.1443	0.936748	0.44	5.83	7	160	14	BC	4	GFP
animal 8	170522RF1	Nkx2.1cre RCE Syngap1 flox	control	M	11.03.22	1	67	21.4832	5.3	186.339	223.7	0.2237	1.18561	0.48	8.21	1	185	14	BC	4	GFP
animal 8	170522RF4	Nkx2.1cre RCE Syngap1 flox	control	M	11.03.22	1	67	13.6228	6.70833	148.477	93.67	0.09367	0.62837	0.45	4.74	7	105	16	BC	4	GFP
animal 9	290422RF1	Nkx2.1cre RCE Syngap1 flox	cHet	M	17.02.22	4	71	17.937	7.25833	136.722	135.4	0.1354	0.982778	0.32	3.9	1	195	12	BC	4	GFP
animal 9	290422RF3	Nkx2.1cre RCE Syngap1 flox	cHet	M	17.02.22	4	71	16.3838	11.1833	88.9142	102.7	0.1027	1.14853	0.28	3.87	5	150	13	BC	4	GFP
animal 9	290422RF4	Nkx2.1cre RCE Syngap1 flox	cHet	M	17.02.22	4	71	18.5841	19.2	51.9155	114.8	0.1148	2.20416	0.39	4.13	7	250	12	BC	4	GFP
animal 10	040522RF2	Nkx2.1cre RCE Syngap1 flox	cHet	M	28.02.22	0	65	30.4454	28.175	35.3755	163.4	0.1634	4.6038	0.35	4.03	3	150	11	BC	4	GFP
animal 10	040522RF3	Nkx2.1cre RCE Syngap1 flox	cHet	M	28.02.22	0	65	20.2425	13.7833	72.2838	159.2	0.1592	2.19431	0.46	6.46	5	165	14	BC	4	GFP
animal 10	040522RF4	Nkx2.1cre RCE Syngap1 flox	cHet	M	28.02.22	0	65	15.6639	34.1	29.297	75.94	0.07594	2.58955	0.34	2.79	7	350	11	BC	4	GFP
animal 10	040522RF5	Nkx2.1cre RCE Syngap1 flox	cHet	M	28.02.22	0	65	34.1497	20.2833	49.265	176	0.176	3.56987	0.34	3.67	9	280	12	BC	4	GFP
animal 10	040522RF6	Nkx2.1cre RCE Syngap1 flox	cHet	M	28.02.22	0	65	24.1355	13.25	75.0273	185	0.185	2.45125	0.38	5.64	11	210	14	BC	4	GFP
animal 11	050522RF1	Nkx2.1cre RCE Syngap1 flox	cHet	M	28.02.22	0	66	17.9082	14.35	69.6942	115.7	0.1157	1.66029	0.39	4.7	1	200	13	BC	4	GFP
animal 11	050522RF2	Nkx2.1cre RCE Syngap1 flox	cHet	M	28.02.22	0	66	13.9733	5.98333	165.117	70.96	0.07096	0.424577	0.44	3.05	3	270	15	BC	4	GFP
animal 12	180522RF1	Nkx2.1cre RCE Syngap1 flox	cHet	M	11.03.22	3	68	16.8895	38.925	25.6593	76	0.076	2.9583	0.4	2.96	1	450	11	BC	4	GFP
animal 12	180522RF3	Nkx2.1cre RCE Syngap1 flox	cHet	M	11.03.22	3	68	15.858	15.25	65.1813	88.86	0.08886	1.35511	0.35	5.44	5	140	14	BC	4	GFP
animal 12	180522RF4	Nkx2.1cre RCE Syngap1 flox	cHet	M	11.03.22	3	68	27.2393	11.5	86.5848	224.4	0.2244	2.5806	0.52	6.35	7	160	15	BC	4	GFP
animal 12	180522RF5	Nkx2.1cre RCE Syngap1 flox	cHet	M	11.03.22	3	68	10.5603	18.4083	54.1925	39.44	0.03944	0.726025	0.32	2.93	9	190	13	BC	4	GFP
animal 13	041022RF3	Nkx2.1cre RCE Syngap1 flox	cHET	M	13.06.22	0	81	12.0212	7.63333	130.148	85.35	0.08535	0.651505	0.55	3.99	5	100	13	BC	4	GFP
animal 14	181022RF1	Nkx2.1cre RCE Syngap1 flox	cHET	M	01.08.22	3	78	11.0405	3.53333	276.8	94.55	0.09455	0.334077	0.65	8.57	1	50	15	BC	4	GFP
animal 14	181022RF2	Nkx2.1cre RCE Syngap1 flox	cHET	M	01.08.22	3	78	17.407	5.375	184.17	165.5	0.1655	0.889563	0.99	8.36	3	130	15	BC	4	GFP
animal 14	181022RF4	Nkx2.1cre RCE Syngap1 flox	cHET	M	01.08.22	3	78	22.0095	6.96667	142.287	159.7	0.1597	1.11258	0.7	6.01	7	280	13	BC	4	GFP
animal 14	181022RF5	Nkx2.1cre RCE Syngap1 flox	cHET	M	01.08.22	3	78	25.472	7.25	137.085	190.3	0.1903	1.37968	0.62	5.46	10	160	14	BC	4	GFP
animal 14	181022RF6	Nkx2.1cre RCE Syngap1 flox	cHET	M	01.08.22	3	78	28.3473	37.0583	26.9231	203.4	0.2034	7.53766	0.54	4.53	12	275	14	BC	4	GFP
animal 15	191022RF2	Nkx2.1cre RCE Syngap1 flox	cHET	M	01.08.22	2	79	12.3868	3.85	256.253	199.6	0.1996	0.76846	0.6	8.03	4	115	15	BC	4	GFP
animal 15	191022RF3	Nkx2.1cre RCE Syngap1 flox	cHET	M	01.08.22	2	79	24.2241	34.3167	29.0781	127.3	0.1273	4.36851	0.49	3.22	6	250	13	BC	4	GFP
animal 15	191022RF5	Nkx2.1cre RCE Syngap1 flox	cHET	M	01.08.22	2	79	15.251	5.45833	181.124	159.5	0.1595	0.870604	0.86	6.75	10	155	13	BC	4	GFP
animal 15	191022RF6	Nkx2.1cre RCE Syngap1 flox	cHET	M	01.08.22	2	79	17.0267	15.1667	65.5842	87.42	0.08742	1.32587	0.48	3.75	12	220	13	BC	4	GFP
					control		AVG	21.5456	12.575	106.441	127.891	0.127891	1.43252	0.3788	4.45
							SD	5.40807	8.02333	52.1609	47.7995	0.0477995	0.703985	0.0710235	1.7827
							SE	1.08161	1.60467	10.4322	9.55989	0.00955989	0.140797	0.0142047	0.356541
					cHet		AVG	19.3815	15.7608	101.445	133.351	0.133351	2.02865	0.49	4.94125
							SD	6.34514	11.0439	71.0225	50.2731	0.0502731	1.66848	0.177225	1.75861
							SE	1.2952	2.25432	14.4974	10.262	0.010262	0.340577	0.0361759	0.358976
							F value	1.726	1.4	0.115	0.12		2.809	2.907	0.293
							p value	0.195	0.243	0.739	0.734		0.1	0.103	0.597
