# Supplementary material for: Syngap1 regulates the synaptic drive and membrane excitability of Parvalbumin-positive interneurons in mouse auditory cortex
Source: eLife. 2025 Aug 14;13:RP97100. doi: 10.7554/eLife.97100 (PMC12352866; doi:10.7554/eLife.97100)
Supplement: Figure 4—source data 1. [file elife-97100-fig4-data1.xlsx]

## Sheet: Sheet1
	PV cells in control	PV cells in cHet	LMM
	(n=33)	(n=40)
	15 animals	17 animals
Resting membrane potential (mV)	-70.51 ± 0.85	-68.32 ± 0.86	F=3.293
			p=0.081
Input resistance (MΩ )	275.51 ± 14.15	251.02 ± 12.31	F=1.767
			p=0.188
Membrane capacitance (pF)	29.00 ± 1.09	29.6 ± 0.87	F=1.767
			p=0.188
Membrane time constant (ms)	7.88 ± 0.47	7.19 ± 0.30	F=1.679
			p=0.199
Rheobase current (pA)	129.09 ± 6.69	167.00 ± 9.37	F=9.256
			p=0.004**
AP threshold (mV)	-42.57 ± 1.01	-35.29 ± 1.22	F=17.519
			p<0.001***
AP amplitude (mV)	62.06 ± 1.36	56.99 ± 1.49	F=5.079
			p=0.032*
AP latency (ms)	31.44 ± 4.09	81.80 ± 17.00	F=7.136
			p=0.009*
AP half width (ms)	0.85 ± 0.04	0.73 ± 0.03	F=2.697
			p=0.111
AP rise time (10-90 % ms)	0.38 ± 0.01	0.34 ± 0.01	F=3.266
			p=0.080
AP decay time (10-90 % ms)	0.73 ± 0.04	0.62 ± 0.03	F=2.628
			p=0.115
fAHP (mV)	-15.50 ± 0.57	-16.96 ± 0.57	F=3.281
			p=0.074
fAHP (ms)	3.41 ± 0.16	2.97 ± 0.13	F=2.840
			p=0.103
Ih sag (mV)	0.75 ± 0.06	0.79 ± 0.10	F=0.100
			p=0.752
SAAR	0.78 ± 0.01 (n=32)	0.74 ± 0.02	F=1.887
			p=0.174
FFAR	1.35 ± 0.03 (n=32)	1.32 ± 0.02	F=0.473
			p=0.496
Firing frequency at 2x rheobase current (Hz)	84.72 ± 4.98	101.6 ± 5.51	F=3.219
			p=0.082
Fmax (Hz)	163.88 ± 7.32 (n=27)	171.84 ± 7.62	F=0.457
			p=0.507
Fss (Hz)	102.33 ± 5.91 (n=27)	114.29 ± 5.68	F=1.421
			p=0.243
