# Supplementary material for: Syngap1 regulates the synaptic drive and membrane excitability of Parvalbumin-positive interneurons in mouse auditory cortex
Source: eLife. 2025 Aug 14;13:RP97100. doi: 10.7554/eLife.97100 (PMC12352866; doi:10.7554/eLife.97100)
Supplement: Figure 4—source data 2. [file elife-97100-fig4-data2.xlsx]

## Sheet: Memb. props. BC L4
Subject ID	Cell	Mouse Line	Genotype	Sex	DOB	ID	Age	Vm	Rm	Cm	Rheobase, pA	Latency ms	AP ampl, mV	AP dur, ms	Area AP	AP thresh, mV	Rise time (10-90%)	Decay time (10-90%)	Max, rise slop (mv/ms)	Norm. Max, rise slop (mv/ms)	Max, decay slope (mv/ms)	Norm. Max, decay slope (mv/ms)	Ratio max ris/max decay	Tau (Rm x Cm)/1000	fAHP time (ms)	AHP amplit,, mV	Sag Ih	Firing frequ, At rheobase	File #	Firing freq Hz at 2x rheobase	spike amplit, AP index At 2x rheobase	spike freq, AP index at 2x rheobase	Current for depol, Block (pA)	Mv depolariz, Block	Fmax	Fss	Adaptation ratio (dimensionless)	Firing	Anatomy	Tag	Layer	File #	Injected current
animal 1	140722RF1b	Nkx2.1cre RCE Syngap1 flox	control	M	03.05.22	2	72	-76	400	30	120	13.7	47.1	0.52	16.8	-42.5	0.280812	0.496864	185.897	3.94687	-98.2306	-2.08558	-1.89246	12	2.3	-13.4	0.7	74	3	142	0.63048	1.46296	280	29.3	185.185	128.205	0.692308	fast spiking	BC	GFP	4	3	0 pA
animal 1	140722RF3	Nkx2.1cre RCE Syngap1 flox	control	M	03.05.22	2	72	-75	300	25	160	19.5	46.4	0.9	28.1	-36	0.418881	0.786637	127.9	2.75646	-61.6229	-1.32808	-2.07552	7.5	4.2	-15.3	0.6	2	6	4			200	33.5				fast spiking with depol. Block	BC	GFP	4	6	0 pA
animal 1	140722RF4	Nkx2.1cre RCE Syngap1 flox	control	M	03.05.22	2	72	-60	160	34	140	28.6	59.4	0.52	16.9	-44	0.262385	0.420128	269.536	4.53764	-133.7	-2.25084	-2.01598	5.44	2.3	-20.7	0.6	2	8	70	0.766942	1.62	580	40.3	181.818	104.987	0.577428	fast spiking	BC	GFP	4	8	60 pA
animal 2	020822RF3	Nkx2.1cre RCE Syngap1 flox	control	M	30.05.22	1	64	-74	300	27	120	20	58.3	0.92	41.4	-40.3	0.433531	0.78869	161.684	2.77331	-71.7338	-1.23043	-2.25394	8.1	3.7	-16.1	0.9	4	3	80	0.646104	1.3299	320	27.1	103.093	75.3296	0.730697	fast spiking with depol. Block	BC	GFP	4	3	0 pA
animal 3	180822RF2	Nkx2.1cre RCE Syngap1 flox	control	M	06.06.22	2	73	-80	270	31	160	20.4	55.1	0.44	14.7	-40.9	0.235874	0.32527	249.847	4.53444	-161.172	-2.92508	-1.55019	8.37	1.8	-21.7	0.33	42	1	146	0.859621	1.23333	not present		277.778	201.005	0.723618	fast spiking	BC	GFP	4	1	0 pA
animal 3	180822RF3	Nkx2.1cre RCE Syngap1 flox	control	M	06.06.22	2	73	-76	212	36	160	62.8	56.8	0.65	23.2	-39	0.276578	0.549405	217.949	3.83713	-98.2306	-1.72941	-2.21874	7.632	2.7	-15.4	0.7	32	4	98	0.789753	1.28916	560	25.6	178.571	101.781	0.569975	fast spiking	BC	GFP	4	4	0 pA
animal 4	190822RF4a	Nkx2.1cre RCE Syngap1 flox	control	M	06.06.22	0	74	-76	300	24	120	18.4	51.3	0.84	43.4	-41.5	0.41677	0.831028	143.99	2.80683	-65.6288	-1.27931	-2.19401	7.2	3.5	-7.9	0.3	60	9	120	0.758285	1.40323	320	22.3	169.492	113.314	0.668555	fast spiking	BC	GFP	4	9	0 pA
animal 4	190822RF4d	Nkx2.1cre RCE Syngap1 flox	control	M	06.06.22	0	74	-66	170	31	200	19.4	61.9	0.7	38.5	-36.8	0.365643	0.66842	187.118	3.02292	-96.0952	-1.55243	-1.94722	5.27	3	-9.4	1.7	8	14	124	0.704762	1.39062	480	17.4	175.439	109.29	0.622951	fast spiking	BC	GFP	4	14	50 pA
animal 4	190822RF5	Nkx2.1cre RCE Syngap1 flox	control	M	06.06.22	0	74	-73	460	30	80	40.2	61.2	0.8	36.7	-33.7	0.31897	0.647839	211.844	3.4615	-88.8278	-1.45144	-2.38488	13.8	3.4	-15.8	0.7	22	17	70	0.874214	1.67416	440	19.3	196.078	84.7458	0.432203	fast spiking with depol. Block	BC	GFP	4	17	40 pA
animal 5	220822RF1	Nkx2.1cre RCE Syngap1 flox	control	M	06.06.22	11	77	-72	260	31	120	18.2	69.7	1.02	66.6	-45.2	0.498741	0.942128	163.614	2.34741	-71.9951	-1.03293	-2.27257	8.06	4	-10.9	0.52	36	0	76	0.769553	1.30841	480	21.7	138.889	75.3296	0.542373	fast spiking	BC	GFP	4	0	0 pA
animal 5	220822RF2	Nkx2.1cre RCE Syngap1 flox	control	M	06.06.22	11	77	-65	280	21	80	33.8	80.6	0.97	74.5	-43.9	0.475519	0.834618	195.055	2.42004	-91.2142	-1.13169	-2.13843	5.88	3.6	-14.4	0.7	12	2	74	0.782667	1.28571	320	22.7	119.048	64.5161	0.541935	fast spiking with depol. Block	BC	GFP	4	2	10 pA
animal 6	210922RF1a	Nkx2.1cre RCE Syngap1 flox	control	M	01.07.22	N568	82	-76	320	21	120	11.2	54.5	1.13	45.8	-46.1	0.510125	0.899359	125.381	2.30057	-59.5238	-1.09218	-2.10641	6.72	4.3	-18.7	0.8	8	1	70	0.637809	1.39048							BC	GFP	4	1	0 pA
animal 6	210922RF1c	Nkx2.1cre RCE Syngap1 flox	control	M	01.07.22	N568	82	-73	200	30	160	18.3	59.7	0.68	27.4	-36.6	0.324233	0.518165	201.77	3.37974	-104.09	-1.74356	-1.93842	6	2.7	-21	1.2	34	3	92	0.707132	1.35714	not present		163.934	99.5025	0.606965	fast spiking	BC	GFP	4	3	10 pA
animal 6	210922RF2d	Nkx2.1cre RCE Syngap1 flox	control	M	01.07.22	N568	82	-69	260	26	120	21.2	62.9	0.84	42.5	-41.8	0.412959	0.65528	173.887	2.76449	-89.0787	-1.4162	-1.95205	6.76	3.1	-17.8	0.5	8	9	94	0.813559	1.24731	600	18.2	153.846	111.111	0.722222	fast spiking with depol. Block	BC	GFP	4	9	10 pA
animal 7	220922RF1	Nkx2.1cre RCE Syngap1 flox	control	M	01.07.22	N571	83	-70	260	25	120	20.8	67.4	0.69	42.3	-42.6	0.350302	0.540108	206.044	3.05703	-116.606	-1.73005	-1.76702	6.5	2.6	-16.8	1	30	1	102	0.790323	1.15854							BC	GFP	4	1	0 pA
animal 7	220922RF2	Nkx2.1cre RCE Syngap1 flox	control	M	01.07.22	N571	83	-71	240	32	160	17.6	58.4	0.84	36.4	-41	0.37463	0.726688	180.903	3.09765	-78.4493	-1.34331	-2.30599	7.68	3.5	-16.2	0.7	42	2	88	0.702265	1.27473	560	21.6	136.986	92.1659	0.672811	fast spiking with depol. Block	BC	GFP	4	2	10 pA
animal 7	220922RF3	Nkx2.1cre RCE Syngap1 flox	control	M	01.07.22	N571	83	-77	240	38	160	72.3	66.6	0.59	30	-42.6	0.312136	0.463234	228.632	3.43292	-133.394	-2.00292	-1.71396	9.12	2.2	-17.5	0.6	26	3	112	0.892128	1.06024	not present		185.185	151.515	0.818182	fast spiking	BC	GFP	4	3	0 pA
animal 8	260922RF2c	Nkx2.1cre RCE Syngap1 flox	control	M	01.07.22	N569	87	-70	360	25	120	21	62	0.89	48.7	-39.5	0.388962	0.788613	196.581	3.17066	-76.3126	-1.23085	-2.576	9	3.4	-15.5	1.1	34	11	76	0.695788	1.49462	520	21.8	142.857	83.682	0.585774	fast spiking with depol. Block	BC	GFP	4	11	20 pA
animal 8	260922RF3a	Nkx2.1cre RCE Syngap1 flox	control	M	01.07.22	569	87	-66	340	46	120	23.5	57	0.94	42.7	-40.4	0.389199	0.935665	165.14	2.8972	-61.3553	-1.07641	-2.69154	15.64	4.9	-13.1	0.4	28	12	62	0.747145	1.6	480	24.6	123.457	59.5238	0.482143	fast spiking with depol. Block	BC	GFP	4	12	30 pA
animal 8	260922RF3c	Nkx2.1cre RCE Syngap1 flox	control	M	01.07.22	N569	87	-71	260	24	120	20.5	67	0.88	51.7	-41.1	0.37339	0.721938	199.817	2.98234	-85.4701	-1.27567	-2.33786	6.24	3.3	-17.5	0.6	38	14	82	0.743066	1.43011	520	20.1	147.059	87.5274	0.595186	fast spiking with depol. Block	BC	GFP	4	14	10 pA
animal 8	260922RF4	Nkx2.1cre RCE Syngap1 flox	control	M	01.07.22	N569	87	-70	320	29	80	47.5	63.3	0.73	31.3	-45.9	0.340069	0.611463	194.139	3.06697	-95.8486	-1.5142	-2.02548	9.28	3	-16.1	0.1	18	19	66	0.915305	1.29167	not present		188.679	108.401	0.574526	fast spiking with depol. Block	BC	GFP	4	19	30 pA
animal 9	270922RF1	Nkx2.1cre RCE Syngap1 flox	control	M	15.07.22	0	74	-80	240	41	80	10.2	69	0.71	45.3	-55.6	0.350999	0.615003	211.844	3.0702	-109.28	-1.58376	-1.93855	9.84	2.4	-13.7	0.9	54	0	94	0.878788	1.69333	not present		217.391	118.694	0.545994	fast spiking	BC	GFP	4	0	0 pA
animal 10	280922RF2	Nkx2.1cre RCE Syngap1 flox	control	M	15.07.22	1	75	-70	210	35	80	25.5	71.4	0.64	38.8	-52.2	0.329846	0.545998	234.594	3.28563	-123.246	-1.72613	-1.90347	7.35	2.5	-13.6	0.2	30	6	90	0.912568	1.18947	not present		212.766	142.857	0.671429	fast spiking	BC	GFP	4	6 folder 280922secondone	60 pA
animal 11	300922RF2c	Nkx2.1cre RCE Syngap1 flox	control	M	19.07.22	3	73	-70	200	24	80	21.5	70.7	0.79	44.6	-49.1	0.348964	0.690061	238.56	3.37426	-100.122	-1.41615	-2.38269	4.8	3.1	-17.5	0.7	32	25	74	0.857939	1.30841	600	32.6	169.492	102.564	0.605128	fast spiking with depol. Block	BC	GFP	4	25	0 pA
Animal 12	150223RF1a	Nkx2,1cre RCE Syngap1 flox	control	M	20.11.22	1204	87	-70	160	33	80	27.3	60.8	1.17	58.1	-52.9	0.438032	1.06424	147.741	2.42995	-51.2821	-0.843455	-2.88095	5.28	5	-12.4	0.76	2	1	50	0.766055	1.30435							BC	GFP	4	1	0 Pa
Animal 13	200323RF2a	Nkx2,1cre RCE Syngap1 flox	control	M	13.01.23	4	66	-70	350	25	120	21.5	69.4	1.21	67.1	-47.2	0.521982	1.05747	156.593	2.25639	-61.3553	-0.884082	-2.55224	8.75	4.5	-15.9	0.76	32	3	66	0.803672	1.41228	not present		128.205	73.1529	1.75256	regular no dep. Block	BC	GFP	4	3	50 Pa
Animal 13	200323RF2d	Nkx2,1cre RCE Syngap1 flox	control	M	13.01.23	4	66	-63	280	20	120	22.4	72.3	1.62	100.4	-44.1	0.604256	1.55014	132.173	1.82812	-43.6508	-0.603745	-3.02797	5.6	5.8	-15.8	0.85	28	5	56	0.74965	1.57252							BC	GFP	4	5	50 pA
Animal 14	230522RF1b	Nkx2,1cre RCE Syngap1 flox	control	M	18.03.23	2	66	-68	480	30	80	34.3	67.7	1.32	66.3	-43.4	0.602963	1.12713	132.173	1.95234	-56.1661	-0.829632	-2.35326	14.4	5	-18.7	0.52	24	2	54	0.781792	1.30719	440	-19	96.1538	58.1395	1.65385	regular with dep. Block	BC	GFP	4		2
Animal 14	230522RF2	Nkx2,1cre RCE Syngap1 flox	control	M	18.03.23	2	66	-66	190	22	160	56.5	74.1	0.85	53	-39.3	0.373704	0.751389	215.985	2.91478	-93.6547	-1.2639	-2.30619	4.18	3	-15.9	1.1	6	3	70	0.863014	1.58947	not present		156.25	86.2069	1.8125	regular no dep. Block	BC	GFP	4		3
Animal 15	070623RF1c	Nkx2,1cre RCE Syngap1 flox	control	M	30.03.23	8	72	-63	250	23	200	6.3	52.9	0.84	43.1	-54.2	0.39489	0.815317	161.783	3.05827	-68.6813	-1.29832	-2.35556	5.75	3	-8.1	0.52	82	2	136	0.668519	1.32203			178.571	129.87	1.375		BC	GFP	4		2
Animal 15	070623RF1d	Nkx2,1cre RCE Syngap1 flox	control	M	30.03.23	8	72	-70	170	37	200	96.9	59.5	0.69	31.2	-41.9	0.32737	0.591515	189.866	3.19102	-99.2064	-1.66733	-1.91385	6.29	2.8	-13.4	0.67	6	4	74	0.923588	1	not present		144.928	100.341	1.44435	regular no dep. Block	BC	GFP	4		4
Animal 15	070623RF4a	Nkx2,1cre RCE Syngap1 flox	control	M	30.03.23	8	69	-65	400	20	120	108	57.6	0.91	28	-34.6	0.427761	0.748597	143.162	2.48546	-73.5653	-1.27718	-1.94606	8	3.9	-17.6	1.5	28	11	84	0.82906	1.02586							BC	GFP	4		11
Animal 15	070623RF4b	Nkx2,1cre RCE Syngap1 flox	control	M	30.03.23	8	69	-66	250	31	200	38.5	56.2	0.84	16.6	-29.2	0.365282	0.700843	172.772	3.07423	-73.2601	-1.30356	-2.35833	7.75	4.2	-17.9	1.71	28	13	100	0.704319	1.37179	not present		153.846	99.2556	1.55	regular no dep. Block	BC	GFP	4		13
animal 16	080722RF1	Nkx2.1cre RCE Syngap1 flox	cHet	M	28.04.22	1	71	-71	180	38	180	19.1	47.5	0.34	2.22	-30.23	0.222642	0.25909	270.39	5.69242	-180.056	-3.79066	-1.50169	6.84	1.5	-23.16	1.33	12	2	113.75	0.670711	1.74194	700	30.2	303.03	181.818	0.6	fast spiking	BC	GFP	4	2	20 pA
animal 16	080722RF2c	Nkx2.1cre RCE Syngap1 flox	cHet	M	28.04.22	1	71	-60	117	38	320	10.9	42.3	0.37	4.83	-26.6	0.22183	0.281218	231.022	5.4615	-143.13	-3.38368	-1.61407	4.446	1.6	-22.2	1.39	2	5	117.5	0.617761	1.59184	380	28.9	131.579	89.4855	0.680089	fast spiking	BC	GFP	4	5	30 pA
animal 16	080722RF3	Nkx2.1cre RCE Syngap1 flox	cHet	M	28.04.22	1	71	-60	240	25	160	182.7	49.1	0.51	16.9	-34.1	0.251065	0.405192	216.678	4.413	-114.748	-2.33702	-1.8883	6	2	-15.2	2.01	2	8	8.75	0.578748	1.30435	160	32.3	151.515	120.482	0.795181	fast spiking with depol. Block	BC	GFP	4	8	40 pA
animal 17	150722RF4	Nkx2.1cre RCE Syngap1 flox	cHet	M	03.05.22	3	73	-67	170	35	210	446.3	43.4	0.39	8.9	-30.6	0.228199	0.306727	234.737	5.4087	-129.652	-2.98738	-1.81052	5.95	1.7	-17.7	0.7	6	5	172	0.933014	1.05	not present at 600		256.41	212.766	0.829787	fast spiking	BC	GFP	4	5	10 pA				until 600 no depol. Block
animal 17	150722RF6	Nkx2.1cre RCE Syngap1 flox	cHet	M	03.05.22	3	73	-72	240	25	200	17.7	48.7	0.46	14.8	-27.1	0.314077	0.384541	206.96	4.24969	-131.788	-2.70611	-1.5704	6	1.8	-18.9	1.2	4	10	180	0.778195	1.40426	not present at 600		250	162.602	0.650407	fast spiking	BC	GFP	4	10	0 pA				until 480 no depol. Block
animal 18	190722RF2	Nkx2.1cre RCE Syngap1 flox	cHet	M	03.05.22	1	77	-70	170	37	170	68.3	51.2	0.36	5.1	-30.9	0.217676	0.311294	286.63	5.59824	-159.341	-3.11212	-1.79885	6.29	1.8	-18.2	3	34	6	134	0.893773	1.21875	600		312.5	218.579	0.699454	fast spiking	BC	GFP	4	6	30 pA				until 650 no depol. Block
animal 18	190722RF3	Nkx2.1cre RCE Syngap1 flox	cHet	M	03.05.22	1	77	-70	350	23	120	23.6	47.4	0.62	13.9	-29.6	0.314794	0.447158	166.667	3.51617	-104.027	-2.19466	-1.60215	8.05	2.5	-24.7	0.15	44	8	110	0.749141	1.30986	440	24.05	181.818	131.579	0.723684	fast spiking	BC	GFP	4	8	10 pA
animal 19	250722RF4	Nkx2.1cre RCE Syngap1 flox	cHet	M	20.05.22	2	66	-67	190	32	200	24	43.9	0.58	7.8	-25.2	0.306889	0.526817	154.762	3.52533	-85.7753	-1.95388	-1.80427	6.08	2.7	-15.7	0.9	8	11	124	0.51987	1.45161	440	11.02	161.29	107.527	0.666667	fast spiking	BC	GFP	4	11	60 Pa
animal 20	030822RF1	Nkx2.1cre RCE Syngap1 flox	cHet	M	30.05.22	0	65	-72	360	27	120	12.3	45.5	0.51	15.6	-40.3	0.299876	0.500268	190.36	4.18374	-97.3154	-2.1388	-1.95611	9.72	2.2	-13.2	1.7	2	0	158	0.735729	1.4	320	27.07	232.558	141.343	0.607774	fast spiking with depol. Block	BC	GFP	4	0	0 pA
animal 21	230822RF1	Nkx2.1cre RCE Syngap1 flox	cHet	M	06.06.22	12	78	-77	160	37	120	22.4	55.7	0.82	30.4	-46.7	0.349828	0.655493	166.972	2.9977	-76.266	-1.36923	-2.18934	5.92	3.1	-18	0.5	46	0	94	0.711893	1.29885	440	30.6	151.515	87.146	0.575163	fast spiking	BC	GFP	4	0	0 pA
animal 21	230822RF3	Nkx2.1cre RCE Syngap1 flox	cHet	M	06.06.22	12	78	-66	268	26	120	31.5	65.6	1.05	48	-32.8	0.417466	0.880729	166.565	2.5391	-68.3344	-1.04168	-2.4375	6.968	3.5	-17.5	0.85	32	6	72	0.72214	1.33019	440	15	126.582	70.4225	0.556338	fast spiking	BC	GFP	4	6	20 pA
animal 21	230822RF4b	Nkx2.1cre RCE Syngap1 flox	cHet	M	06.06.22	12	78	-66	260	33	120	23.3	56	0.92	48.3	-39.3	0.36845	0.876831	156.193	2.78916	-64.7131	-1.15559	-2.41362	8.58	3.3	-8.4	2.1	34	9	96	0.831541	1.58108	600	7.8	200	101.781	0.508906	fast spiking	BC	GFP	4	9	40 pA
animal 21	230822RF5	Nkx2.1cre RCE Syngap1 flox	cHet	M	06.06.22	12	78	-62	170	34	160	16.3	72.4	0.59	30.7	-47.6	0.325667	0.44831	263.126	3.63433	-147.131	-2.03219	-1.78838	5.78	2.3	-19.1	0.26	22	11	112	0.790909	1.19178	not present at 600		208.333	116.618	0.559767	fast spiking	BC	GFP	4	11	20 pA
animal 22	250822RF2	Nkx2.1cre RCE Syngap1 flox	cHet	M	06.06.22	10	80	-60	175	31	160	240	60	0.79	37.9	-46	0.375157	0.663785	170.33	2.83883	-89.7436	-1.49573	-1.89796	5.425	2.9	-14.7	0.1	6	6	78	0.902946	1.48864	not present at 600		163.934	112.676	0.687324	fast spiking	BC	GFP	4	6	40 pa
animal 23	270722RF3	Nkx2.1cre RCE Syngap1 flox	cHet	M	20.05.22	4	68	-67	266	26	120	20.7	50.9	0.75	15.5	-34.8	0.359926	0.655131	166.667	3.27439	-79.9756	-1.57123	-2.08397	6.916	3.8	-19.9	1.2	32	8	82	0.8125	1.19	520	18.7	136.986	96.8054	0.70668	fast spiking with depol. Block	BC	GFP	4	8	50 Pa
animal 23	270722RF4B	Nkx2.1cre RCE Syngap1 flox	cHet	M	20.05.22	4	68	-69	220	27	120	29.5	42.7	0.78	17.5	-29.6	0.349938	0.693097	154.457	3.61725	-65.0183	-1.52268	-2.37559	5.94	3.4	-16	1.1	2	11	78	0.614191	1.55814	280	20.97	114.943	73.5294	0.639706	fast spiking with depol. Block	BC	GFP	4	11	10 Pa
animal 23	270722RF6	Nkx2.1cre RCE Syngap1 flox	cHet	M	20.05.22	4	68	-72	200	27	240	14.3	59.5	0.74	38.9	-27.4	0.331964	0.679875	195.851	3.29162	-88.5226	-1.48777	-2.21244	5.4	2.6	-12.8	0.4	56	3 folder 260722	118	0.283361	1.80702	520	5	161.29	100	0.62	fast spiking with depol. Block	BC	GFP	4	3 folder 260722	0 Pa
animal 24	090223RF2a	Nkx2,1cre RCE Syngap1 flox	cHet	M	08.11.22	1	93	-82	280	35	40	35.5	70.7	0.7	35	-58.2	0.352156	0.537698	213.065	3.01365	-115.079	-1.62771	-1.85146	9.8	2.8	-20.6	0.32	6	5	54	0.911609	1.06832	400	43.4	172.414	115.207	1.49655	regular with dep. Block	BC	GFP	4	5	plus 10 Pa
animal 24	090223RF2b	Nkx2,1cre RCE Syngap1 flox	cHet	M	08.11.22	1	93	-64	200	32	160	27.1	64.2	0.97	50.2	-39.8	0.399862	0.843046	189.14	2.9461	-71.6901	-1.11667	-2.6383	6.4	3.7	-15.5	0.85	28	8	80	0.670455	1.29592	not present		144.928	92.5926	1.56522	regular no dep. Block	BC	GFP	4	8	70 pa
Animal 25	280223RF2	Nkx2,1cre RCE Syngap1 flox	cHet	M	22.12.22	0	68	-66	320	34	120	24.8	76.6	1.09	77.8	-36.7	0.453776	1.11078	200.244	2.61415	-70.8181	-0.924518	-2.82759	10.88	4.2	-12.9	1.22	30	1	62	0.673969	1.36434	480	19.7	120.482	54.6448	2.20482	regular with dep. Block	BC	GFP	4	1	20 Pa
Animal 26	220323RF1	Nkx2,1cre RCE Syngap1 flox	cHet	M	13.01.23	3	68	-60	180	40	120	361.8	66.7	0.84	22.8	-37.4	0.357753	0.685535	197.802	2.96555	-87.5534	-1.31264	-2.25922	7.2	3.5	-23.3	0.37	4	1	68	0.88169	1.02055	not present		147.059	101.523	1.44853	regular no dep. Block	BC	GFP	4	1	50 pA
Animal 27	230323RF1	Nkx2,1cre RCE Syngap1 flox	cHet	M	15.01.23	8	67	-65	190	28	160	200.6	57.4	0.79	38.5	-32.2	0.377753	0.701874	178.877	3.11632	-82.9774	-1.4456	-2.15573	5.32	3.1	-12.8	0.37	8	1	126	0.732297	1.10526			147.059	120.919	1.21618		BC	GFP	4	1	60 pA
Animal 27	230323RF2C	Nkx2,1cre RCE Syngap1 flox	cHet	M	15.01.23	8	67	-63	300	30	120	35.7	72.3	1.29	79.4	-37.9	0.529674	1.19209	157.509	2.17855	-57.6923	-0.797957	-2.73016	9	4.8	-15.7	0.58	22	5	64	0.771509	1.30579	400	11.6	103.093	74.0741	1.39175	regular with dep. Block	BC	GFP	4	5
Animal 28	170523RF1	Nkx2,1cre RCE Syngap1 flox	cHet	M	03.03.23	10	75	-66	250	35	240	14.6	54.9	0.72	31	-32.9	0.334105	0.572204	174.603	3.18039	-94.0171	-1.71252	-1.85714	8.75	2.7	-15.3	0.52	70	0	130	0.495575	1.58182	not present		181.818	120.482	1.50909	regular no dep. Block	BC	GFP	4	0	50 pA
Animal 28	170523RF5	Nkx2,1cre RCE Syngap1 flox	cHet	M	03.03.23	10	75	-73	290	23	120	25	72.2	0.93	50.3	-36.8	0.429411	0.778808	192.613	2.66777	-83.9438	-1.16266	-2.29455	6.67	3.5	-18.3	0.98	38	8	90	0.825034	1.26374			153.846	103.093	1.49231	regular no dep. Block	BC	GFP	4	8	30 pA
Animal 29	010623RF1a	Nkx2,1cre RCE Syngap1 flox	cHet	M	27.03.23	2	66	-73	340	26	120	27.5	53.7	0.72	22.6	-40.4	0.318761	0.594573	186.508	3.47315	-86.9963	-1.62004	-2.14386	8.84	3	-18.1	0.61	4	0	92	0.833893	1.19565	560	-23.9	166.667	116.279	1.43333	regular with dep. Block	BC	GFP	4		0
Animal 29	010623RF4	Nkx2,1cre RCE Syngap1 flox	cHet	M	27.03.23	2	66	-73	190	28	240	19	50.2	0.68	19.3	-39.3	0.314234	0.552414	171.856	3.42342	-89.1331	-1.77556	-1.92808	5.32	2.8	-17.4	0.27	50	8	134	0.61326	1.2459	not present		163.934	129.87	1.2623	regular no dep. Block	BC	GFP	4		8
Animal 30	050623RF1a	Nkx2,1cre RCE Syngap1 flox	cHet	M	27.03.23	1	70	-64	220	31	280	97.1	65.1	0.65	25.5	-20.6	0.314683	0.540538	233.679	3.58954	-112.637	-1.73022	-2.07461	6.82	2.7	-19.6	1.04	26	0	114	0.650957	1.15584	not present		140.845	109.89	1.28169	regular no dep. Block	BC	GFP	4		0
Animal 30	050623RF1b	Nkx2,1cre RCE Syngap1 flox	cHet	M	27.03.23	1	70	-62	500	29	80	98.1	53	0.89	24.8	-31.6	0.383501	0.7402	144.383	2.72421	-70.5128	-1.33043	-2.04762	14.5	4	-17.7	1.43	10	1	56	0.902256	1.13772			123.457	82.6446	1.49383		BC	GFP	4		1
Animal 30	050623RF4	Nkx2,1cre RCE Syngap1 flox	cHet	M	27.03.23	1	70	-75	375	25	120	51	65.5	0.65	34	-43.4	0.351308	0.547233	205.433	3.13639	-115.314	-1.76052	-1.78151	9.375	2.6	-14.3	0.1	24	6	108	0.932432	1.11905	not present		227.273	161.29	1.40909	fast spiking real	BC	GFP	4		6
Animal 30	050623RF5	Nkx2,1cre RCE Syngap1 flox	cHet	M	27.03.23	1	70	-71	270	21	160	30.2	53.7	0.66	26.3	-35.5	0.297083	0.540137	183.038	3.40854	-91.5751	-1.70531	-1.99878	5.67	3.6	-20.7	0.73	2	9	102	0.850082	1.21519	not present		196.078	121.951	1.60784	fast spiking real	BC	GFP	4		9
Animal 31	060623RF2a	Nkx2,1cre RCE Syngap1 flox	cHet	M	27.03.23	3	71	-63	270	21	160	43.3	67.2	0.91	38.6	-34	0.390385	0.743741	190.476	2.83447	-82.0622	-1.22116	-2.32112	5.67	3.6	-17.5	0.64	2	4	84	0.831871	1.38636	not present		185.185	112.994	1.63889	regular no dep. Block	BC	GFP	4		4
Animal 31	060623RF2c	Nkx2,1cre RCE Syngap1 flox	cHet	M	27.03.23	3	71	-64	400	19	120	27.8	52.9	1.3	43.5	-38.1	0.523875	1.11927	111.653	2.11065	-47.2849	-0.893855	-2.36129	7.6	5.2	-15.5	0.18	28	6	66	0.857732	1.37288	600	2.1	113.636	65.7895	1.72727	regular with dep. Block	BC	GFP	4		6
Animal 32	080623RF2a	Nkx2,1cre RCE Syngap1 flox	cHet	M	30.03.23	11	70	-75	300	26	160	21	51.2	0.87	22.9	-40.9	0.359408	0.741636	156.899	3.06443	-66.809	-1.30486	-2.34846	7.8	3.4	-15.2	0.31	42	3	92	0.677543	1.41558	520	-19.1	140.845	87.7193	1.60563	regular with dep. Block	BC	GFP	4		3
Animal 32	080623RF2b	Nkx2,1cre RCE Syngap1 flox	cHet	M	30.03.23	11	70	-72	200	37	240	101.6	65.2	0.72	38.5	-42.1	0.454414	0.5895	178.462	2.73715	-104.942	-1.60954	-1.70058	7.4	2.9	-13.9	0.15	40	4	120	0.716237	1.18056	not present		153.846	111.732	1.37692	regular no dep. Block	BC	GFP	4		4
Animal 32	080623RF4	Nkx2,1cre RCE Syngap1 flox	cHet	M	30.03.23	11	70	-65	200	33	160	210	55.6	0.88	32.8	-37.1	0.383804	0.721145	156.288	2.81094	-74.7863	-1.34508	-2.0898	6.6	3.6	-17.2	0.92	8	8	58	0.795812	1.28777	not present		135.135	68.8231	1.96351	regular no dep. Block	BC	GFP	4		8
Animal 33	090623RF3a	Nkx2,1cre RCE Syngap1 flox	cHet	M	30.03.23	7	71	-71	200	26	280	324.5	59.5	0.63	33.4	-28.4	0.338518	0.573724	197.376	3.31725	-108.669	-1.82637	-1.81631	5.2	2.5	-10.1	0.15	2	6 et 7	148	0.761682	1.41176	not present		196.078	138.889	1.41176	regular no dep. Block	BC	GFP	4		6 et 7
Animal 33	090623RF3b	Nkx2,1cre RCE Syngap1 flox	cHet	M	30.03.23	7	71	-73	280	26	200	231.7	52	0.66	9.22	-32.6	0.281446	0.552061	193.716	3.7253	-88.5226	-1.70236	-2.18832	7.28	2.7	-17.3	0.31	20	8 et 9	106	0.684906	1.35135	520	-15.8	144.928	96.1538	1.50725	regular with dep. Block	BC	GFP	4		8 et 9
Animal 33	090623RF4	Nkx2,1cre RCE Syngap1 flox	cHet	M	30.03.23	7	71	-66	320	22	200	42.5	48.7	0.65	3.87	-16.5	0.316752	0.50185	161.477	3.31576	-90.299	-1.85419	-1.78825	7.04	3	-22.6	0.76	28	10	124	0.663669	1.375	600	3.78	166.667	125	1.33333	regular with dep. Block	BC	GFP	4		10
Animal 33	090623RF6	Nkx2,1cre RCE Syngap1 flox	cHet	M	30.03.23	7	71	-79	230	36	240	18.7	69.4	0.61	35.8	-40.7	0.289635	0.563314	261.905	3.77384	-120.879	-1.74177	-2.16667	8.28	2.4	-11.8	0.1	28	13	138	0.846591	1.40741			204.082	135.135	1.5102	fast spiking real	BC	GFP	4		13
			avg control					-70.5152	275.515	29	129.091	31.4485	62.0667	0.850909	42.1848	-42.5788	0.389265	0.739674	185.575	3.0156	-87.6379	-1.42787	-2.19024	7.8843	3.41515	-15.5061	0.755758	27.6364	6.57576	84.7273	0.780183	1.35622	452.941	22.3	163.889	102.334	0.83595
			sd					4.89337	81.3096	6.27495	38.4353	23.5403	7.81492	0.24173	18.469	5.83967	0.0878594	0.237128	36.9115	0.618927	26.3591	0.451895	0.324659	2.71071	0.939122	3.30841	0.375508	19.8397	6.18481	28.6523	0.0839336	0.173965	122.666	12.2611	38.0413	30.7407	0.42945
			se					0.851826	14.1542	1.09233	6.69073	4.09784	1.3604	0.0420798	3.21505	1.01656	0.0152944	0.0412787	6.42546	0.107741	4.58852	0.0786648	0.0565159	0.471874	0.16348	0.575921	0.0653676	3.45365	1.07664	4.98773	0.0148375	0.0307529	21.3535	2.13439	7.32106	5.91605	0.0747577
																								8.35618			0.821125
			avg cHet					-68.325	251.025	29.6	167	81.8	56.9925	0.73475	28.8335	-35.2982	0.345194	0.625473	190.884	3.42897	-95.9933	-1.74505	-2.05786	7.193	2.975	-16.9665	0.795	21.6	5.59459	101.6	0.743187	1.32955	472.381	13.6695	171.841	114.296	1.14986
			sd					5.45089	77.885	5.52755	59.2777	107.568	9.48679	0.223549	17.8555	7.72091	0.0718323	0.213865	36.9794	0.869394	28.647	0.668109	0.316398	1.89852	0.823299	3.60843	0.635783	17.8092	3.77462	34.8886	0.134936	0.179025	125.455	17.9667	48.2429	35.9359	0.465995
			se					0.861861	12.3147	0.873983	9.37263	17.008	1.49999	0.0353462	2.8232	1.22078	0.0113577	0.0338151	5.84696	0.137463	4.52949	0.105637	0.0500269	0.300183	0.130175	0.570543	0.100526	2.81589	0.59682	5.51638	0.0213352	0.0283064	19.8362	2.84079	7.62787	5.68197	0.0736803
			LMM Statistic
			F value					3.293	1.767	0.194	9.256	7.136	5.079	2.697	5.885	17.519	3.266	2.628	0.384	3.032	0.982	2.955	3.106	1.679	2.84	3.281	0.1	1.927		3.219	1.887	0.473	0.573		0.457	1.421	3.691
			p Value					0.081	0.188	0.661	**0.004	*0.009	*0.032	0.111	*0.021	***<0.001	0.08	0.115	0.538	0.091	0.329	0.095	0.094	0.199	0.103	0.074	0.752	0.169		0.082	0.174	0.496	0.586		0.507	0.243	0.064
