# Supplementary material for: Syngap1 regulates the synaptic drive and membrane excitability of Parvalbumin-positive interneurons in mouse auditory cortex
Source: eLife. 2025 Aug 14;13:RP97100. doi: 10.7554/eLife.97100 (PMC12352866; doi:10.7554/eLife.97100)
Supplement: Figure 5—source data 1. [file elife-97100-fig5-data1.xlsx]

## Sheet: Sheet1
	BC-short	BC-broad	LMM
	(n=5)	(n=5)
	4 animals	4 animals
Distance from pia (µm)	398.20 ± 21.40	392.40 ± 27.06	F=0.035
			p=0.856
Soma perimeter (µm)	39.20 ± 2.16	40.68 ± 0.75	F=7.473
			p=0.053
Number of dendrites	7.60 ± 0.67	7.60 ± 1.20	F=0.001
			p=1.000
Number of branching points	18.40 ± 1.63	28.80 ± 4.55	F=5.778
			p=0.043*
Number of terminals	28.60 ± 1.56	37.60 ± 6.26	F=2.427
			p=0.158
Total dendritic lengt (µm)	2304.84 ± 103.86	3181.27 ± 440.23	F=4.933
			p=0.057
Dendritic surface area (µm2)	7483.76 ± 450.22	11859.68 ± 1653.16	F=9.263
			p=0.016*
