# Supplementary material for: Syngap1 regulates the synaptic drive and membrane excitability of Parvalbumin-positive interneurons in mouse auditory cortex
Source: eLife. 2025 Aug 14;13:RP97100. doi: 10.7554/eLife.97100 (PMC12352866; doi:10.7554/eLife.97100)
Supplement: Figure 5—source data 2. [file elife-97100-fig5-data2.xlsx]

## Sheet: Morp. ctrl BC short vs BC broad
	Cell ID	Mouse line	Genotype	Sex	DOB	ID	Age	AP duration	Distance from Pia	Dends number	Bifurcations	Terminals	Total Dend lenght	Perimeter Soma Leica	Surface area occupied by dends.
Animal 1	020822RF2	Tg(Nkx2.1-Cre);Syngap1flox/+	control	M	30.05.22	1	64	0.61	464	10	17	30	1907.27	32.3	5718.6
Animal 2	180822RF2	Tg(Nkx2.1-Cre);Syngap1flox/+	control	M	06.06.22	2	73	0.44	407	8	24	34	2428.36	43.5	7836.15
Animal 2	180822RF3	Tg(Nkx2.1-Cre);Syngap1flox/+	control	M	06.06.22	2	73	0.65	362	6	18	25	2481.26	41.4	7688.56
Animal 3	190822RF4d	Tg(Nkx2.1-Cre);Syngap1flox/+	control	M	06.06.22	0	74	0.7	416	7	14	27	2296.51	36	7941.94
Animal 6	280922RF2	Tg(Nkx2.1-Cre);Syngap1flox/+	control	M	15.07.22	1	75	0.64	342	7	19	27	2410.84	42.8	8233.57
Animal 1	020822RF3	Tg(Nkx2.1-Cre);Syngap1flox/+	control	M	30.05.22	1	64	0.92	411	6	13	19	1641.23	40.3	6266.15
Animal 3	190822RF4a	Tg(Nkx2.1-Cre);Syngap1flox/+	control	M	06.06.22	0	74	0.84	337	11	40	56	4254.85	38.9	15820.5
Animal 4	220822RF1	Tg(Nkx2.1-Cre);Syngap1flox/+	control	M	06.06.22	11	77	1.02	443	9	34	44	3428.22	40.5	13974.1
Animal 4	220822RF2	Tg(Nkx2.1-Cre);Syngap1flox/+	control	M	06.06.22	11	77	0.97	320	4	26	30	3656.2	40.2	12863.1
Animal 5	220922RF2	Tg(Nkx2.1-Cre);Syngap1flox/+	control	M	01.07.22	N571	83	0.84	451	8	31	39	2925.88	43.5	10374.5
								AVG short	398.2	7.6	18.4	28.6	2304.85	39.2	7483.76
								SD	47.9395	1.51658	3.64692	3.50714	232.244	4.85129	1006.73
								SE	21.4392	0.678233	1.63095	1.56844	103.863	2.16956	450.225
								AVG broad	392.4	7.6	28.8	37.6	3181.28	40.68	11859.7
								SD	60.5211	2.70185	10.1833	14.0107	984.386	1.69765	3696.6
								SE	27.0658	1.2083	4.55412	6.26578	440.231	0.75921	1653.17
								LMM
								F value	0.035	0.001	5.778	2.427	4.933	7.473	9.263
								p value	0.856	1	*0.043	0.158	0.057	0.053	*0.016
