# Supplementary material for: Syngap1 regulates the synaptic drive and membrane excitability of Parvalbumin-positive interneurons in mouse auditory cortex
Source: eLife. 2025 Aug 14;13:RP97100. doi: 10.7554/eLife.97100 (PMC12352866; doi:10.7554/eLife.97100)
Supplement: Figure 5—source data 3. [file elife-97100-fig5-data3.xlsx]

## Sheet: Sheet1
	BC-short	BC-broad	LMM
	(n=6)	(n=6)
	5 animals	3 animals
Distance from pia (µm)	398.33 ± 18.6	385.50 ± 17.48	F=0.302
			p=0.594
Soma perimeter (µm)	41.40 ± 2.90	38.50 ± 0.66	F=1.143
			p=0.310
Number of dendrites	5.00 ± 0.36	7.00 ± 0.68	F=7.998
			p=0.032*
Number of branching points	26.83 ± 3.50	34.83 ± 3.11	F=3.493
			p=0.081
Number of terminals	32.50 ± 3.61	42.33 ± 2.77	F=5.509
			p=0.040*
Total dendritic lengt (µm)	2618.24 ± 128.54	3145.34 ± 243.28	F=4.403
			p=0.062
Dendritic surface area (µm2)	10864.15 ± 890.13	11358.15 ± 1248.32	F=0.125
			p=0.731
