# Supplementary material for: Syngap1 regulates the synaptic drive and membrane excitability of Parvalbumin-positive interneurons in mouse auditory cortex
Source: eLife. 2025 Aug 14;13:RP97100. doi: 10.7554/eLife.97100 (PMC12352866; doi:10.7554/eLife.97100)
Supplement: Figure 5—source data 4. [file elife-97100-fig5-data4.xlsx]

## Sheet: Morp. cHet BC short vs BC broad
	Cell ID	Mouse line	Genotype	Sex	DOB	ID	Age	AP duration	Distance from Pia	Dends number	Bifurcations	Terminals	Total Dend lenght	Perimeter Soma Leica	Surface area occupied by dends.
Animal 7	230822RF1	Tg(Nkx2.1-Cre);Syngap1flox/+	cHet	M	06.06.22	12	78	0.82	355	9	28	37	2553.54	39.6	10805.7
Animal 7	230822RF3	Tg(Nkx2.1-Cre);Syngap1flox/+	cHet	M	06.06.22	12	78	1.05	345	9	27	37	3161.46	36.6	11473.5
Animal 7	230822RF4b	Tg(Nkx2.1-Cre);Syngap1flox/+	cHet	M	06.06.22	12	78	0.92	377	6	47	53	3554.92	39.2	13946.8
Animal 10	250822RF2	Tg(Nkx2.1-Cre);Syngap1flox/+	cHet	M	06.06.22	10	80	0.79	460	5	32	37	2535.34	37.2	6797.09
Animal 11	290822RF5	Tg(Nkx2.1-Cre);Syngap1flox/+	cHet	M	06.06.22	1	84	0.9	410	6	35	42	4073.84	40.8	15393.4
Animal 11	290822RF6b	Tg(Nkx2.1-Cre);Syngap1flox/+	cHet	M	06.06.22	1	84	0.91	366	7	40	48	2992.97	37.6	9732.41
Animal 12	230822RF5	Tg(Nkx2.1-Cre);Syngap1flox/+	cHet	M	06.06.22	12	78	0.59	358	4	26	30	2670.96	41.63	10333.4
Animal 8	080722RF2c	Tg(Nkx2.1-Cre);Syngap1flox/+	cHet	M	28.04.22	1	71	0.37	410	6	37	44	3122.99	48.7	13112.9
Animal 9	150722RF4	Tg(Nkx2.1-Cre);Syngap1flox/+	cHet	M	03.05.22	3	73	0.39	364	5	19	24	2713.65	49.2	13412.6
Animal 9	150722RF6	Tg(Nkx2.1-Cre);Syngap1flox/+	cHet	M	03.05.22	3	73	0.46	480	6	17	23	2460.54	38.8	11070.9
Animal 13	250722RF4	Tg(Nkx2.1-Cre);Syngap1flox/+	cHet	M	20.05.22	2	66	0.58	407	5	25	32	2572.69	40.1	9599.78
Animal 13	270722RF1	Tg(Nkx2.1-Cre);Syngap1flox/+	cHet	M	20.05.22	4	68	0.68	371	4	37	42	2168.66	30	7655.42
								AVG broad	385.5	7	34.8333	42.3333	3145.34	38.5	11358.2
								SD	42.8334	1.67332	7.62671	6.80196	595.931	1.61864	3057.75
								SE	17.4867	0.68313	3.11359	2.77689	243.288	0.660808	1248.32
								AVG short	398.333	5	26.8333	32.5	2618.25	41.405	10864.2
								SD	45.68	0.894427	8.58875	8.84873	314.872	7.10764	2180.39
								SE	18.6488	0.365148	3.50634	3.61248	128.546	2.90168	890.139
								LMM
								F value	0.302	7.998	3.493	5.509	4.403	1.143	0.125
								p Value	0.594	*0.032	0.081	*0.04	0.062	0.31	0.731
