# Supplementary material for: Syngap1 regulates the synaptic drive and membrane excitability of Parvalbumin-positive interneurons in mouse auditory cortex
Source: eLife. 2025 Aug 14;13:RP97100. doi: 10.7554/eLife.97100 (PMC12352866; doi:10.7554/eLife.97100)
Supplement: Figure 5—source data 5. [file elife-97100-fig5-data5.xlsx]

## Sheet: Sheet1
	BC-short in control	BC-short in cHet	LMM
	(n=5)	(n=6)
	4 animals	4 animals
Distance from pia (µm)	398.20 ± 21.40	398.33 ± 18.64	F=0.001
			p=0.996
Soma perimeter (µm)	39.20 ± 2.16	41.40 ± 2.90	F=0.488
			p=0.523
Number of dendrites	7.60 ± 0.67	5.00 ± 0.36	F=15.364
			p=0.002**
Number of branching points	18.40 ± 1.63	26.83 ± 3.50	F=5.294
			p=0.048*
Number of terminals	28.60 ± 1.56	32.50 ± 3.61	F=1.190
			p=0.305
Total dendritic lengt (µm)	2304.84 ± 103.86	2618.24 ± 128.54	F=4.640
			p=0.070
Dendritic surface area (µm2)	7483.76 ± 450.22	10864.15 ± 890.13	F=11.510
			p=0.009*
