# Supplementary material for: Syngap1 regulates the synaptic drive and membrane excitability of Parvalbumin-positive interneurons in mouse auditory cortex
Source: eLife. 2025 Aug 14;13:RP97100. doi: 10.7554/eLife.97100 (PMC12352866; doi:10.7554/eLife.97100)
Supplement: Figure 5—source data 6. [file elife-97100-fig5-data6.xlsx]

## Sheet: Morp. sh. in control vs chet
	Cell ID	Mouse line	Genotype	Sex	DOB	ID	Age	AP duration	Distance from Pia	Dends number	Bifurcations	Terminals	Total Dend lenght	Perimeter Soma Leica	Surface area occupied by dends.
Animal 1	020822RF2	conditional	control	M	30.05.22	1	64	0.61	464	10	17	30	1907.27	32.3	5718.6
Animal 2	180822RF2	conditional	control	M	06.06.22	2	73	0.44	407	8	24	34	2428.36	43.5	7836.15
Animal 2	180822RF3	conditional	control	M	06.06.22	2	73	0.65	362	6	18	25	2481.26	41.4	7688.56
Animal 3	190822RF4d	conditional	control	M	06.06.22	0	74	0.7	416	7	14	27	2296.51	36	7941.94
Animal 6	280922RF2	conditional	control	M	15.07.22	1	75	0.64	342	7	19	27	2410.84	42.8	8233.57
Animal 7	230822RF5	conditional	cHet	M	06.06.22	12	78	0.59	358	4	26	30	2670.96	41.63	10333.4
Animal 8	080722RF2c	conditional	cHet	M	28.04.22	1	71	0.37	410	6	37	44	3122.99	48.7	13112.9
Animal 9	150722RF4	conditional	cHet	M	03.05.22	3	73	0.39	364	5	19	24	2713.65	49.2	13412.6
Animal 9	150722RF6	conditional	cHet	M	03.05.22	3	73	0.46	480	6	17	23	2460.54	38.8	11070.9
Animal 12	250722RF4	conditional	cHet	M	20.05.22	2	66	0.58	407	5	25	32	2572.69	40.1	9599.78
Animal 12	270722RF1	conditional	cHet	M	20.05.22	4	68	0.68	371	4	37	42	2168.66	30	7655.42
									AVG control	398.2	7.6	18.4	28.6	2304.85	39.2	7483.76
									SD	47.9395	1.51658	3.64692	3.50714	232.244	4.85129	1006.73
									SE	21.4392	0.678233	1.63095	1.56844	103.863	2.16956	450.225
									AVG cHet	398.333	5	26.8333	32.5	2618.25	41.405	10864.2
									SD	45.68	0.894427	8.58875	8.84873	314.872	7.10764	2180.39
									SE	18.6488	0.365148	3.50634	3.61248	128.546	2.90168	890.139
									LMM
									F value	0.001	15.364	5.294	1.19	4.64	0.448	11.51
									p Value	0.996	0.002	*0.048	0.305	0.07	0.523	*0.009
