# Supplementary material for: Syngap1 regulates the synaptic drive and membrane excitability of Parvalbumin-positive interneurons in mouse auditory cortex
Source: eLife. 2025 Aug 14;13:RP97100. doi: 10.7554/eLife.97100 (PMC12352866; doi:10.7554/eLife.97100)
Supplement: Figure 5—source data 7. [file elife-97100-fig5-data7.xlsx]

## Sheet: Sheet1
	BC-broad in control	BC-broad in cHet	LMM
	(n=5)	(n=6)
	4 animals	3 animals
Distance from pia (µm)	392.40 ± 27.06	385.50 ± 17.40	F=0.060
			p=0.812
Soma perimeter (µm)	40.68 ± 0.75	38.50 ± 0.66	F=5.789
			p=0.040*
Number of dendrites	7.60 ± 1.20	7.00 ± 0.68	F=0.205
			p=0.662
Number of branching points	28.80 ± 4.55	34.83 ± 3.11	F=1.266
			p=0.290
Number of terminals	37.60 ± 6.26	42.33 ± 2.77	F=0.541
			p=0.481
Total dendritic lengt (µm)	3181.27 ± 440.23	3145.34 ± 243.28	F=0.002
			p=0.967
Dendritic surface area (µm2)	11859.68 ± 1653.16	11358.15 ± 1248.32	F=0.088
			p=0.784
