# Supplementary material for: Syngap1 regulates the synaptic drive and membrane excitability of Parvalbumin-positive interneurons in mouse auditory cortex
Source: eLife. 2025 Aug 14;13:RP97100. doi: 10.7554/eLife.97100 (PMC12352866; doi:10.7554/eLife.97100)
Supplement: Figure 5—source data 8. [file elife-97100-fig5-data8.xlsx]

## Sheet: Morp. broad in control vs chet
	Cell ID	Mouse line	Genotype	DOB	ID	Age	AP duration	Distance from Pia	Dends number	Bifurcations	Terminals	Total Dend lenght	Perimeter Soma Leica	Surface area occupied by dends.
Animal 1	020822RF3	Tg(Nkx2.1-Cre);Syngap1flox/+	control	30.05.22	1	64	0.92	411	6	13	19	1641.23	40.3	6266.15
Animal 3	190822RF4a	Tg(Nkx2.1-Cre);Syngap1flox/+	control	06.06.22	0	74	0.84	337	11	40	56	4254.85	38.9	15820.5
Animal 4	220822RF1	Tg(Nkx2.1-Cre);Syngap1flox/+	control	06.06.22	11	77	1.02	443	9	34	44	3428.22	40.5	13974.1
Animal 4	220822RF2	Tg(Nkx2.1-Cre);Syngap1flox/+	control	06.06.22	11	77	0.97	320	4	26	30	3656.2	40.2	12863.1
Animal 5	220922RF2	Tg(Nkx2.1-Cre);Syngap1flox/+	control	01.07.22	N571	83	0.84	451	8	31	39	2925.88	43.5	10374.5
Animal 7	230822RF1	Tg(Nkx2.1-Cre);Syngap1flox/+	cHet	06.06.22	12	78	0.82	355	9	28	37	2553.54	39.6	10805.7
Animal 7	230822RF3	Tg(Nkx2.1-Cre);Syngap1flox/+	cHet	06.06.22	12	78	1.05	345	9	27	37	3161.46	36.6	11473.5
Animal 7	230822RF4b	Tg(Nkx2.1-Cre);Syngap1flox/+	cHet	06.06.22	12	78	0.92	377	6	47	53	3554.92	39.2	13946.8
Animal 10	250822RF2	Tg(Nkx2.1-Cre);Syngap1flox/+	cHet	06.06.22	10	80	0.79	460	5	32	37	2535.34	37.2	6797.09
Animal 11	290822RF5	Tg(Nkx2.1-Cre);Syngap1flox/+	cHet	06.06.22	1	84	0.9	410	6	35	42	4073.84	40.8	15393.4
Animal 11	290822RF6b	Tg(Nkx2.1-Cre);Syngap1flox/+	cHet	06.06.22	1	84	0.91	366	7	40	48	2992.97	37.6	9732.41
							avg ctrl	392.4	7.6	28.8	37.6	3181.28	40.68	11859.7
							sd	60.5211	2.70185	10.1833	14.0107	984.386	1.69765	3696.6
							se	27.0658	1.2083	4.55412	6.26578	440.231	0.75921	1653.17
							avg cHet	385.5	7	34.8333	42.3333	3145.34	38.5	11358.2
							sd	42.8334	1.67332	7.62671	6.80196	595.931	1.61864	3057.75
							se	17.4867	0.68313	3.11359	2.77689	243.288	0.660808	1248.32
							LMM
							F value	0.06	0.205	1.266	0.541	0.002	5.709	0.088
							p Value	0.812	0.662	0.29	0.481	0.967	*0.04	0.784
