# Supplementary material for: Syngap1 regulates the synaptic drive and membrane excitability of Parvalbumin-positive interneurons in mouse auditory cortex
Source: eLife. 2025 Aug 14;13:RP97100. doi: 10.7554/eLife.97100 (PMC12352866; doi:10.7554/eLife.97100)
Supplement: Figure 6—source data 1. [file elife-97100-fig6-data1.xlsx]

## Sheet: Sheet1
	BC-short in control	BC-short in cHet	LMM
	(n=12)	(n=24)
	9 animals	13 animals
Resting membrane potential (mV)	-72.33 ± 1.69	-69.79 ± 1.08	F=1.798
			p=0.189
Input resistance (MΩ )	237.66 ± 19.98	242.00 ± 14.09	F=0.033
			p=0.856
Membrane capacitance (pF)	33.08 ± 1.09	29.79 ± 0.87	F=3.331
			p=0.077
Membrane time constant (ms)	7.75 ± 0.58	6.96 ± 0.31	F=1.818
			p=0.187
Rheobase current (pA)	138.33 ± 12.42	190.00 ± 13.22	F=6.573
			p=0.015*
AP threshold (mV)	-43.38 ± 1.63	-33.95 ± 1.84	F=11.458
			p=0.002**
AP amplitude (mV)	61.43 ± 1.94	54.60 ± 1.86	F=5.570
			p=0.024*
AP latency (ms)	36.36 ± 7.91	77.08 ± 22.70	F=1.631
			p=0.210
AP half width (ms)	0.63 ± 0.02	0.59 ± 0.02	F=0.779
			p=0.386
AP rise time (10-90 % ms)	0.31 ± 0.01	0.30 ± 0.01	F=0.146
			p=0.705
AP decay time (10-90 % ms)	0.52 ± 0.02	0.49 ± 0.02	F=0.832
			p=0.368
fAHP (mV)	-16.05 ± 1.06	-17.60 ± 0.77	F=1.423
			p=0.241
fAHP (ms)	2.52 ± 0.10	2.50 ± 0.11	F=0.009
			p=0.926
Ih sag (mV)	0.72 ± 0.12	0.80 ± 0.14	F=0.130
			p=0.720
SAAR	0.81 ± 0.02	0.72 ± 0.03	F=3.715
			p=0.062
FFAR	1.31 ± 0.06	1.33 ± 0.04	F=0.082
			p=0.776
Firing frequency at 2x rheobase current (Hz)	100.83 ± 7.55	116.66 ± 7.24	F=1.977
			p=0.169
Fmax (Hz)	191.97 ± 10.48 (n=11)	191.74 ± 10.14	F=0.001
			p=0.989
Fss (Hz)	124.23 ± 9.32 (n=11)	131.72 ± 6.92	F=0.411
			p=0.526
