# Supplementary material for: Syngap1 regulates the synaptic drive and membrane excitability of Parvalbumin-positive interneurons in mouse auditory cortex
Source: eLife. 2025 Aug 14;13:RP97100. doi: 10.7554/eLife.97100 (PMC12352866; doi:10.7554/eLife.97100)
Supplement: Figure 6—source data 2. [file elife-97100-fig6-data2.xlsx]

## Sheet: Memb. props BC Sh. ctrl vs cHet
Subject ID	Cell	Mouse Line	Genotype	Sex	DOB	ID	Age	Vm	Rm	Cm	Rheobase, pA	Latency ms	AP ampl, mV	AP dur, ms	Area AP	AP thresh, mV	Rise time (10-90%)	Decay time (10-90%)	Max, rise slop (mv/ms)	Max, decay slope (mv/ms)	Ratio max ris/max decay	Tau (Rm x Cm)/1000	fAHP time (ms)	AHP amplit,, mV	Sag Ih	Firing frequ, At rheobase	File #	Firing freq, (n spikes in 500 ms) Hz at 2x rheobase	spike amplit, AP index At 2x rheobase	spike freq, AP index at 2x rheobase	Current for depol, Block (pA)	Mv depolariz, Block	Fmax	Fss	Adaptation ratio (dimensionless)	Firing	Anatomy	Layer	Tag	File #	Injected current
animal 1	140722RF1b	Nkx2.1cre RCE Syngap1 flox	control	M	03.05.22	2	72	-76	400	30	120	13.7	47.1	0.52	16.8	-42.5	0.280812	0.496864	185.897	-98.2306	-1.89246	12	2.3	-13.4	0.7	74	3	142	0.63048	1.46296	280	29.3	185.185	128.205	0.692308	fast spiking	BC	4	GFP	3	0 pA
animal 1	140722RF4	Nkx2.1cre RCE Syngap1 flox	control	M	03.05.22	2	72	-60	160	34	140	28.6	59.4	0.52	16.9	-44	0.262385	0.420128	269.536	-133.7	-2.01598	5.44	2.3	-20.7	0.6	2	8	70	0.766942	1.62	580	40.3	181.818	104.987	0.577428	fast spiking	BC	4	GFP	8	60 pA
animal 3	180822RF2	Nkx2.1cre RCE Syngap1 flox	control	M	06.06.22	2	73	-80	270	31	160	20.4	55.1	0.44	14.7	-40.9	0.235874	0.32527	249.847	-161.172	-1.55019	8.37	1.8	-21.7	0.33	42	1	146	0.859621	1.23333	not present		277.778	201.005	0.723618	fast spiking	BC	4	GFP	1	0 pA
animal 3	180822RF3	Nkx2.1cre RCE Syngap1 flox	control	M	06.06.22	2	73	-76	212	36	160	62.8	56.8	0.65	23.2	-39	0.276578	0.549405	217.949	-98.2306	-2.21874	7.632	2.7	-15.4	0.7	32	4	98	0.789753	1.28916	560	25.6	178.571	101.781	0.569975	fast spiking	BC	4	GFP	4	0 pA
animal 4	190822RF4d	Nkx2.1cre RCE Syngap1 flox	control	M	06.06.22	0	74	-66	170	31	200	19.4	61.9	0.7	38.5	-36.8	0.365643	0.66842	187.118	-96.0952	-1.94722	5.27	3	-9.4	1.7	8	14	124	0.704762	1.39062	480	17.4	175.439	109.29	0.622951	fast spiking	BC	4	GFP	14	50 pA
animal 6	210922RF1c	Nkx2.1cre RCE Syngap1 flox	control	M	01.07.22	N568	82	-73	200	30	160	18.3	59.7	0.68	27.4	-36.6	0.324233	0.518165	201.77	-104.09	-1.93842	6	2.7	-21	1.2	34	3	92	0.707132	1.35714	not present		163.934	99.5025	0.606965	fast spiking	BC	4	GFP	3	10 pA
animal 7	220922RF1	Nkx2.1cre RCE Syngap1 flox	control	M	01.07.22	N571	83	-70	260	25	120	20.8	67.4	0.69	42.3	-42.6	0.350302	0.540108	206.044	-116.606	-1.76702	6.5	2.6	-16.8	1	30	1	102	0.790323	1.15854							BC	4	GFP	1	0 pA
animal 7	220922RF3	Nkx2.1cre RCE Syngap1 flox	control	M	01.07.22	N571	83	-77	240	38	160	72.3	66.6	0.59	30	-42.6	0.312136	0.463234	228.632	-133.394	-1.71396	9.12	2.2	-17.5	0.6	26	3	112	0.892128	1.06024	not present		185.185	151.515	0.818182	fast spiking	BC	4	GFP	3	0 pA
animal 8	260922RF4	Nkx2.1cre RCE Syngap1 flox	control	M	01.07.22	N569	87	-70	320	29	80	47.5	63.3	0.73	31.3	-45.9	0.340069	0.611463	194.139	-95.8486	-2.02548	9.28	3	-16.1	0.1	18	19	66	0.915305	1.29167	not present		188.679	108.401	0.574526	fast spiking with depol. Block	BC	4	GFP	19	30 pA
animal 9	270922RF1	Nkx2.1cre RCE Syngap1 flox	control	M	15.07.22	0	74	-80	240	41	80	10.2	69	0.71	45.3	-55.6	0.350999	0.615003	211.844	-109.28	-1.93855	9.84	2.4	-13.7	0.9	54	0	94	0.878788	1.69333	not present		217.391	118.694	0.545994	fast spiking	BC	4	GFP	0	0 pA
animal 10	280922RF2	Nkx2.1cre RCE Syngap1 flox	control	M	15.07.22	1	75	-70	210	35	80	25.5	71.4	0.64	38.8	-52.2	0.329846	0.545998	234.594	-123.246	-1.90347	7.35	2.5	-13.6	0.2	30	6	90	0.912568	1.18947	not present		212.766	142.857	0.671429	fast spiking	BC	4	GFP	6 folder 280922secondone	60 pA
Animal 15	070623RF1d	Nkx2,1cre RCE Syngap1 flox	control	M	30.03.23	8	72	-70	170	37	200	96.9	59.5	0.69	31.2	-41.9	0.32737	0.591515	189.866	-99.2064	-1.91385	6.29	2.8	-13.4	0.67	6	4	74	0.923588	1	not present		144.928	100.341	1.44435	regular no dep. Block	BC	4	GFP	4	20 Pa
animal 16	080722RF1	Nkx2.1cre RCE Syngap1 flox	cHet	M	28.04.22	1	71	-71	180	38	180	19.1	47.5	0.34	2.22	-30.23	0.222642	0.25909	270.39	-180.056	-1.50169	6.84	1.5	-23.16	1.33	12	2	113.75	0.670711	1.74194	700	30.2	303.03	181.818	0.6	fast spiking	BC	4	GFP	2	20 pA
animal 16	080722RF2c	Nkx2.1cre RCE Syngap1 flox	cHet	M	28.04.22	1	71	-60	117	38	320	10.9	42.3	0.37	4.83	-26.6	0.22183	0.281218	231.022	-143.13	-1.61407	4.446	1.6	-22.2	1.39	2	5	117.5	0.617761	1.59184	380	28.9	131.579	89.4855	0.680089	fast spiking	BC	4	GFP	5	30 pA
animal 16	080722RF3	Nkx2.1cre RCE Syngap1 flox	cHet	M	28.04.22	1	71	-60	240	25	160	182.7	49.1	0.51	16.9	-34.1	0.251065	0.405192	216.678	-114.748	-1.8883	6	2	-15.2	2.01	2	8	8.75	0.578748	1.30435	160	32.3	151.515	120.482	0.795181	fast spiking with depol. Block	BC	4	GFP	8	40 pA
animal 17	150722RF4	Nkx2.1cre RCE Syngap1 flox	cHet	M	03.05.22	3	73	-67	170	35	210	446.3	43.4	0.39	8.9	-30.6	0.228199	0.306727	234.737	-129.652	-1.81052	5.95	1.7	-17.7	0.7	6	5	172	0.933014	1.05	not present at 600		256.41	212.766	0.829787	fast spiking	BC	4	GFP	5	10 pA
animal 17	150722RF6	Nkx2.1cre RCE Syngap1 flox	cHet	M	03.05.22	3	73	-72	240	25	200	17.7	48.7	0.46	14.8	-27.1	0.314077	0.384541	206.96	-131.788	-1.5704	6	1.8	-18.9	1.2	4	10	180	0.778195	1.40426	not present at 600		250	162.602	0.650407	fast spiking	BC	4	GFP	10	0 pA
animal 18	190722RF2	Nkx2.1cre RCE Syngap1 flox	cHet	M	03.05.22	1	77	-70	170	37	170	68.3	51.2	0.36	5.1	-30.9	0.217676	0.311294	286.63	-159.341	-1.79885	6.29	1.8	-18.2	3	34	6	134	0.893773	1.21875	600		312.5	218.579	0.699454	fast spiking	BC	4	GFP	6	30 pA
animal 18	190722RF3	Nkx2.1cre RCE Syngap1 flox	cHet	M	03.05.22	1	77	-70	350	23	120	23.6	47.4	0.62	13.9	-29.6	0.314794	0.447158	166.667	-104.027	-1.60215	8.05	2.5	-24.7	0.15	44	8	110	0.749141	1.30986	440	24.05	181.818	131.579	0.723684	fast spiking	BC	4	GFP	8	10 pA
animal 19	250722RF4	Nkx2.1cre RCE Syngap1 flox	cHet	M	20.05.22	2	66	-67	190	32	200	24	43.9	0.58	7.8	-25.2	0.306889	0.526817	154.762	-85.7753	-1.80427	6.08	2.7	-15.7	0.9	8	11	124	0.51987	1.45161	440	11.02	161.29	107.527	0.666667	fast spiking	BC	4	GFP	11	60 Pa
animal 20	030822RF1	Nkx2.1cre RCE Syngap1 flox	cHet	M	30.05.22	0	65	-72	360	27	120	12.3	45.5	0.51	15.6	-40.3	0.299876	0.500268	190.36	-97.3154	-1.95611	9.72	2.2	-13.2	1.7	2	0	158	0.735729	1.4	320	27.07	232.558	141.343	0.607774	fast spiking with depol. Block	BC	4	GFP	0	0 pA
animal 21	230822RF5	Nkx2.1cre RCE Syngap1 flox	cHet	M	06.06.22	12	78	-62	170	34	160	16.3	72.4	0.59	30.7	-47.6	0.325667	0.44831	263.126	-147.131	-1.78838	5.78	2.3	-19.1	0.26	22	11	112	0.790909	1.19178	not present at 600		208.333	116.618	0.559767	fast spiking	BC	4	GFP	11	20 pA
animal 23	270722RF3	Nkx2.1cre RCE Syngap1 flox	cHet	M	20.05.22	4	68	-67	266	26	120	20.7	50.9	0.75	15.5	-34.8	0.359926	0.655131	166.667	-79.9756	-2.08397	6.916	3.8	-19.9	1.2	32	8	82	0.8125	1.19	520	18.7	136.986	96.8054	0.70668	fast spiking with depol. Block	BC	4	GFP	8	50 Pa
animal 23	270722RF6	Nkx2.1cre RCE Syngap1 flox	cHet	M	20.05.22	4	68	-72	200	27	240	14.3	59.5	0.74	38.9	-27.4	0.331964	0.679875	195.851	-88.5226	-2.21244	5.4	2.6	-12.8	0.4	56	3 folder 260722	118	0.283361	1.80702	520	5	161.29	100	0.62	fast spiking with depol. Block	BC	4	GFP	3 folder 260722	0 Pa
animal 24	090223RF2a	Nkx2,1cre RCE Syngap1 flox	cHet	M	08.11.22	1	93	-82	280	35	40	35.5	70.7	0.7	35	-58.2	0.352156	0.537698	213.065	-115.079	-1.85146	9.8	2.8	-20.6	0.32	6	5	54	0.911609	1.06832	400	43.4	172.414	115.207	1.49655	regular with dep. Block	BC	4	GFP	5	plus 10 Pa
Animal 28	170523RF1	Nkx2,1cre RCE Syngap1 flox	cHet	M	03.03.23	10	75	-66	250	35	240	14.6	54.9	0.72	31	-32.9	0.334105	0.572204	174.603	-94.0171	-1.85714	8.75	2.7	-15.3	0.52	70	0	130	0.495575	1.58182	not present		181.818	120.482	1.50909	regular no dep. Block	BC	4	GFP	0	50 pA
Animal 29	010623RF1a	Nkx2,1cre RCE Syngap1 flox	cHet	M	27.03.23	2	66	-73	340	26	120	27.5	53.7	0.72	22.6	-40.4	0.318761	0.594573	186.508	-86.9963	-2.14386	8.84	3	-18.1	0.61	4	0	92	0.833893	1.19565	560	-23.9	166.667	116.279	1.43333	regular with dep. Block	BC	4	GFP	0	30 pA
Animal 29	010623RF4	Nkx2,1cre RCE Syngap1 flox	cHet	M	27.03.23	2	66	-73	190	28	240	19	50.2	0.68	19.3	-39.3	0.314234	0.552414	171.856	-89.1331	-1.92808	5.32	2.8	-17.4	0.27	50	8	134	0.61326	1.2459	not present		163.934	129.87	1.2623	regular no dep. Block	BC	4	GFP	8	10 pA
Animal 30	050623RF1a	Nkx2,1cre RCE Syngap1 flox	cHet	M	27.03.23	1	70	-64	220	31	280	97.1	65.1	0.65	25.5	-20.6	0.314683	0.540538	233.679	-112.637	-2.07461	6.82	2.7	-19.6	1.04	26	0	114	0.650957	1.15584	not present		140.845	109.89	1.28169	regular no dep. Block	BC	4	GFP	0	60 Pa
Animal 30	050623RF4	Nkx2,1cre RCE Syngap1 flox	cHet	M	27.03.23	1	70	-75	375	25	120	51	65.5	0.65	34	-43.4	0.351308	0.547233	205.433	-115.314	-1.78151	9.375	2.6	-14.3	0.1	24	6	108	0.932432	1.11905	not present		227.273	161.29	1.40909	fast spiking real	BC	4	GFP	6	0 pA
Animal 30	050623RF5	Nkx2,1cre RCE Syngap1 flox	cHet	M	27.03.23	1	70	-71	270	21	160	30.2	53.7	0.66	26.3	-35.5	0.297083	0.540137	183.038	-91.5751	-1.99878	5.67	3.6	-20.7	0.73	2	9	102	0.850082	1.21519	not present		196.078	121.951	1.60784	fast spiking real	BC	4	GFP	9	20 pA
Animal 32	080623RF2b	Nkx2,1cre RCE Syngap1 flox	cHet	M	30.03.23	11	70	-72	200	37	240	101.6	65.2	0.72	38.5	-42.1	0.454414	0.5895	178.462	-104.942	-1.70058	7.4	2.9	-13.9	0.15	40	4	120	0.716237	1.18056	not present		153.846	111.732	1.37692	regular no dep. Block	BC	4	GFP	4	30 pA
Animal 33	090623RF3a	Nkx2,1cre RCE Syngap1 flox	cHet	M	30.03.23	7	71	-71	200	26	280	324.5	59.5	0.63	33.4	-28.4	0.338518	0.573724	197.376	-108.669	-1.81631	5.2	2.5	-10.1	0.15	2	6 et 7	148	0.761682	1.41176	not present		196.078	138.889	1.41176	regular no dep. Block	BC	4	GFP	6 et 7	10 pA
Animal 33	090623RF3b	Nkx2,1cre RCE Syngap1 flox	cHet	M	30.03.23	7	71	-73	280	26	200	231.7	52	0.66	9.22	-32.6	0.281446	0.552061	193.716	-88.5226	-2.18832	7.28	2.7	-17.3	0.31	20	8 et 9	106	0.684906	1.35135	520	-15.8	144.928	96.1538	1.50725	regular with dep. Block	BC	4	GFP	8 et 9	60 Pa
Animal 33	090623RF4	Nkx2,1cre RCE Syngap1 flox	cHet	M	30.03.23	7	71	-66	320	22	200	42.5	48.7	0.65	3.87	-16.5	0.316752	0.50185	161.477	-90.299	-1.78825	7.04	3	-22.6	0.76	28	10	124	0.663669	1.375	600	3.78	166.667	125	1.33333	regular with dep. Block	BC	4	GFP	10	0 pA
Animal 33	090623RF6	Nkx2,1cre RCE Syngap1 flox	cHet	M	30.03.23	7	71	-79	230	36	240	18.7	69.4	0.61	35.8	-40.7	0.289635	0.563314	261.905	-120.879	-2.16667	8.28	2.4	-11.8	0.1	28	13	138	0.846591	1.40741			204.082	135.135	1.5102	fast spiking real	BC	4	GFP	13	20 pA
						AVG Control		-72.3333	237.667	33.0833	138.333	36.3667	61.4333	0.63	29.7	-43.3833	0.313021	0.528798	214.77	-114.092	-1.90211	7.75767	2.525	-16.0583	0.725	29.6667	5.5	100.833	0.814283	1.31221	475	28.15	191.97	124.234	0.713429
						SD		5.88269	69.2287	4.52183	43.0292	27.4136	6.74528	0.0921461	10.3135	5.66197	0.0402599	0.0940045	26.4967	20.379	0.168106	2.03267	0.34935	3.70416	0.441104	20.6236	5.68091	26.1667	0.0975919	0.208393	136.991	9.50456	34.7843	30.9232	0.255628
						SE		1.69819	19.9846	1.30534	12.4215	7.91363	1.94719	0.0266003	2.97726	1.63447	0.011622	0.0271368	7.64893	5.88291	0.0485281	0.586781	0.100849	1.0693	0.127336	5.95352	1.63994	7.55368	0.0281724	0.0601578	39.546	2.74373	10.4878	9.3237	0.0737933
																						8.34445			0.852336
						AVG cHet		-69.7917	242	29.7917	190	77.0875	54.6	0.594583	20.4017	-33.9596	0.306571	0.494619	206.04	-111.647	-1.87195	6.96862	2.50833	-17.6025	0.804167	21.8333	6.14286	116.667	0.721859	1.33205	473.846	15.3933	191.748	131.729	1.05329
						SD		5.33226	69.0413	5.5637	64.8074	111.235	9.12178	0.12779	12.138	9.0398	0.0529463	0.115547	37.014	25.875	0.20062	1.52094	0.580042	3.79704	0.713588	19.6129	4.01604	35.5009	0.155695	0.198248	140.092	20.1655	49.7154	33.9293	0.393537
						SE		1.08844	14.093	1.13568	13.2288	22.7057	1.86198	0.026085	2.47767	1.84524	0.0108076	0.0235859	7.55546	5.28171	0.0409513	0.310461	0.118401	0.775068	0.145661	4.00347	0.819771	7.24659	0.0317811	0.0404673	28.5961	4.11626	10.1481	6.92579	0.0803304
																						7.27909
						LMM Statistic
						F value		1.798	0.033	3.331	6.573	1.631	5.57	0.779	5.462	11.458	0.146	0.832	0.559	0.086		1.818	0.009	1.423	0.13	1.307		1.977	3.715	0.082			0	0.411	7.233
						p Value		0.189	0.856	0.077	*0.015	0.21	0.024	0.386	*0.025	**0.002	0.705	0.368	0.46	0.771		0.187	0.926	0.241	0.72	0.261		0.169	0.062	0.776			0.989	0.526	*0.011
