# Supplementary material for: Syngap1 regulates the synaptic drive and membrane excitability of Parvalbumin-positive interneurons in mouse auditory cortex
Source: eLife. 2025 Aug 14;13:RP97100. doi: 10.7554/eLife.97100 (PMC12352866; doi:10.7554/eLife.97100)
Supplement: Figure 6—source data 3. [file elife-97100-fig6-data3.xlsx]

## Sheet: Sheet1
	BC-broad in control	BC-broad in cHet	LMM
	(n=21)	(n=16)
	12 animals	11 animals
Resting membrane potential (mV)	-69.47 ± 0.87	-66.12 ± 1.25	F=5.895
			p=0.023
Input resistance (MΩ )	297.14 ± 19.98	264.56 ± 22.55	F=1.405
			p=0.244
Membrane capacitance (pF)	26.66 ± 1.30	29.31 ± 1.41	F=1.963
			p=0.170
Membrane time constant (ms)	7.95 ± 0.67	7.52 ± 0.59	F=0.224
			p=0.639
Rheobase current (pA)	123.80 ± 7.76	132.50 ± 6.02	F=0.731
			p=0.402
AP threshold (mV)	-42.11 ± 1.31	-37.30 ± 1.18	F=7.313
			p=0.010*
AP amplitude (mV)	62.42 ± 1.85	60.58 ± 2.28	F=0.140
			p=0.713
AP latency (ms)	28.63 ± 4.63	88.86 ± 26.24	F=6.266
			p=0.035*
AP half width (ms)	0.97 ± 0.04	0.94 ± 0.04	F=0.295
			p=0.593
AP rise time (10-90 % ms)	0.43 ± 0.01	0.40 ± 0.01	F=1.513
			p=0.232
AP decay time (10-90 % ms)	0.86 ± 0.04	0.82 ± 0.04	F=0.359
			p=0.556
fAHP (mV)	-15.19 ± 0.67	-16.01 ± 0.79	F=0.620
			p=0.440
fAHP (ms)	3.92 ± 0.16	3.67 ± 0.15	F=1.120
			p=0.297
Ih sag (mV)	0.77 ± 0.07	0.78 ± 0.12	F=0.189
			p=0.667
SAAR	0.75 ± 0.01	0.77 ± 0.02	F=1.715
			p=0.202
FFAR	1.38 ± 0.03	1.32 ± 0.03	F=0.434
			p=0.514
Firing frequency at 2x rheobase current (Hz)	75.52 ± 5.74 (n=20)	79.00 ± 4.50	F=0.984
			p=0.331
Fmax (Hz)	144.58 ± 6.73 (n=16)	141.98 ± 6.50	F=0.746
			p=0.396
Fss (Hz)	87.27 ± 5.04 (n=16)	88.14 ± 4.85	F=1.061
			p=0.312
