# Supplementary material for: Syngap1 regulates the synaptic drive and membrane excitability of Parvalbumin-positive interneurons in mouse auditory cortex
Source: eLife. 2025 Aug 14;13:RP97100. doi: 10.7554/eLife.97100 (PMC12352866; doi:10.7554/eLife.97100)
Supplement: Figure 6—source data 4. [file elife-97100-fig6-data4.xlsx]

## Sheet: Memb. props BC Sh. ctrl vs cHet
Subject ID	Cell	Mouse Line	Genotype	Sex	DOB	ID	Age	Vm	Rm	Cm	Rheobase, pA	Latency ms	AP ampl, mV	AP dur, ms	Area AP	AP thresh, mV	Rise time (10-90%)	Decay time (10-90%)	Max, rise slop (mv/ms)	Max, decay slope (mv/ms)	Ratio max ris/max decay	Tau (Cm x Rm)/1000	fAHP time (ms)	AHP amplit,, mV	Sag Ih	Firing frequ, At rheobase	File #	Firing freq, (n spikes in 500 ms) Hz at 2x rheobase	spike amplit, AP index At 2x rheobase	spike freq, AP index at 2x rheobase	Current for depol, Block (pA)	Mv depolariz, Block	Fmax	Fss	Adaptation ratio (dimensionless)	Firing	Anatomy	Layer	File #	Injected current
animal 1	140722RF3	Nkx2.1cre RCE Syngap1 flox	control	M	03.05.22	2	72	-75	300	25	160	19.5	46.4	0.9	28.1	-36	0.418881	0.786637	127.9	-61.6229	-2.07552	7.5	4.2	-15.3	0.6	2	6	4			200	33.5				fast spiking with depol. Block	not present	4	6	0 pA
animal 2	020822RF3	Nkx2.1cre RCE Syngap1 flox	control	M	30.05.22	1	64	-74	300	27	120	20	58.3	0.92	41.4	-40.3	0.433531	0.78869	161.684	-71.7338	-2.25394	8.1	3.7	-16.1	0.9	4	3	80	0.646104	1.3299	320	27.1	103.093	75.3296	0.730697	fast spiking with depol. Block	BC	4	3	0 pA
animal 4	190822RF4a	Nkx2.1cre RCE Syngap1 flox	control	M	06.06.22	0	74	-76	300	24	120	18.4	51.3	0.84	43.4	-41.5	0.41677	0.831028	143.99	-65.6288	-2.19401	7.2	3.5	-7.9	0.3	60	9	120	0.758285	1.40323	320	22.3	169.492	113.314	0.668555	fast spiking	BC	4	9	0 pA
animal 4	190822RF5	Nkx2.1cre RCE Syngap1 flox	control	M	06.06.22	0	74	-73	460	30	80	40.2	61.2	0.8	36.7	-33.7	0.31897	0.647839	211.844	-88.8278	-2.38488	13.8	3.4	-15.8	0.7	22	17	70	0.874214	1.67416	440	19.3	196.078	84.7458	0.432203	fast spiking with depol. Block	BC	4	17	40 pA
animal 5	220822RF1	Nkx2.1cre RCE Syngap1 flox	control	M	06.06.22	11	77	-72	260	31	120	18.2	69.7	1.02	66.6	-45.2	0.498741	0.942128	163.614	-71.9951	-2.27257	8.06	4	-10.9	0.52	36	0	76	0.769553	1.30841	480	21.7	138.889	75.3296	0.542373	fast spiking	BC	4	0	0 pA
animal 5	220822RF2	Nkx2.1cre RCE Syngap1 flox	control	M	06.06.22	11	77	-65	280	21	80	33.8	80.6	0.97	74.5	-43.9	0.475519	0.834618	195.055	-91.2142	-2.13843	5.88	3.6	-14.4	0.7	12	2	74	0.782667	1.28571	320	22.7	119.048	64.5161	0.541935	fast spiking with depol. Block	BC	4	2	10 pA
animal 6	210922RF1a	Nkx2.1cre RCE Syngap1 flox	control	M	01.07.22	N568	82	-76	320	21	120	11.2	54.5	1.13	45.8	-46.1	0.510125	0.899359	125.381	-59.5238	-2.10641	6.72	4.3	-18.7	0.8	8	1	70	0.637809	1.39048							BC	4	1	0 pA
animal 6	210922RF2d	Nkx2.1cre RCE Syngap1 flox	control	M	01.07.22	N568	82	-69	260	26	120	21.2	62.9	0.84	42.5	-41.8	0.412959	0.65528	173.887	-89.0787	-1.95205	6.76	3.1	-17.8	0.5	8	9	94	0.813559	1.24731	600	18.2	153.846	111.111	0.722222	fast spiking with depol. Block	BC	4	9	10 pA
animal 7	220922RF2	Nkx2.1cre RCE Syngap1 flox	control	M	01.07.22	N571	83	-71	240	32	160	17.6	58.4	0.84	36.4	-41	0.37463	0.726688	180.903	-78.4493	-2.30599	7.68	3.5	-16.2	0.7	42	2	88	0.702265	1.27473	560	21.6	136.986	92.1659	0.672811	fast spiking with depol. Block	BC	4	2	10 pA
animal 8	260922RF2c	Nkx2.1cre RCE Syngap1 flox	control	M	01.07.22	N569	87	-70	360	25	120	21	62	0.89	48.7	-39.5	0.388962	0.788613	196.581	-76.3126	-2.576	9	3.4	-15.5	1.1	34	11	76	0.695788	1.49462	520	21.8	142.857	83.682	0.585774	fast spiking with depol. Block	BC	4	11	20 pA
animal 8	260922RF3a	Nkx2.1cre RCE Syngap1 flox	control	M	01.07.22	569	87	-66	340	46	120	23.5	57	0.94	42.7	-40.4	0.389199	0.935665	165.14	-61.3553	-2.69154	15.64	4.9	-13.1	0.4	28	12	62	0.747145	1.6	480	24.6	123.457	59.5238	0.482143	fast spiking with depol. Block	BC	4	12	30 pA
animal 8	260922RF3c	Nkx2.1cre RCE Syngap1 flox	control	M	01.07.22	N569	87	-71	260	24	120	20.5	67	0.88	51.7	-41.1	0.37339	0.721938	199.817	-85.4701	-2.33786	6.24	3.3	-17.5	0.6	38	14	82	0.743066	1.43011	520	20.1	147.059	87.5274	0.595186	fast spiking with depol. Block	BC	4	14	10 pA
animal 11	300922RF2c	Nkx2.1cre RCE Syngap1 flox	control	M	19.07.22	3	73	-70	200	24	80	21.5	70.7	0.79	44.6	-49.1	0.348964	0.690061	238.56	-100.122	-2.38269	4.8	3.1	-17.5	0.7	32	25	74	0.857939	1.30841	600	32.6	169.492	102.564	0.605128	fast spiking with depol. Block	BC	4	25	0 pA
Animal 12	150223RF1a	Nkx2,1cre RCE Syngap1 flox	control	M	20.11.22	1204	87	-70	160	33	80	27.3	60.8	1.17	58.1	-52.9	0.438032	1.06424	147.741	-51.2821	-2.88095	5.28	5	-12.4	0.76	2	1	50	0.766055	1.30435							BC	4	1	0 Pa
Animal 13	200323RF2a	Nkx2,1cre RCE Syngap1 flox	control	M	13.01.23	4	66	-70	350	25	120	21.5	69.4	1.21	67.1	-47.2	0.521982	1.05747	156.593	-61.3553	-2.55224	8.75	4.5	-15.9	0.76	32	3	66	0.803672	1.41228	not present		128.205	73.1529	1.75256	regular no dep. Block	BC	4	3	50 Pa
Animal 13	200323RF2d	Nkx2,1cre RCE Syngap1 flox	control	M	13.01.23	4	66	-63	280	20	120	22.4	72.3	1.62	100.4	-44.1	0.604256	1.55014	132.173	-43.6508	-3.02797	5.6	5.8	-15.8	0.85	28	5	56	0.74965	1.57252							BC	4	5	50 pA
Animal 14	230523RF1b	Nkx2,1cre RCE Syngap1 flox	control	M	18.03.23	2	66	-68	480	30	80	34.3	67.7	1.32	66.3	-43.4	0.602963	1.12713	132.173	-56.1661	-2.35326	14.4	5	-18.7	0.52	24	2	54	0.781792	1.30719	440	-19	96.1538	58.1395	1.65385	regular with dep. Block	BC	4	2	20 pA
Animal 14	230523RF2	Nkx2,1cre RCE Syngap1 flox	control	M	18.03.23	2	66	-66	190	22	160	56.5	74.1	0.85	53	-39.3	0.373704	0.751389	215.985	-93.6547	-2.30619	4.18	3	-15.9	1.1	6	3	70	0.863014	1.58947	not present		156.25	86.2069	1.8125	regular no dep. Block	BC	4	3	80 Pa
Animal 15	070623RF1c	Nkx2,1cre RCE Syngap1 flox	control	M	30.03.23	8	72	-63	250	23	200	6.3	52.9	0.84	43.1	-54.2	0.39489	0.815317	161.783	-68.6813	-2.35556	5.75	3	-8.1	0.52	82	2	136	0.668519	1.32203			178.571	129.87	1.375		BC	4	2	100 pA
Animal 15	070623RF4a	Nkx2,1cre RCE Syngap1 flox	control	M	30.03.23	8	69	-65	400	20	120	108	57.6	0.91	28	-34.6	0.427761	0.748597	143.162	-73.5653	-1.94606	8	3.9	-17.6	1.5	28	11	84	0.82906	1.02586							BC	4	11	50 pA
Animal 15	070623RF4b	Nkx2,1cre RCE Syngap1 flox	control	M	30.03.23	8	69	-66	250	31	200	38.5	56.2	0.84	16.6	-29.2	0.365282	0.700843	172.772	-73.2601	-2.35833	7.75	4.2	-17.9	1.71	28	13	100	0.704319	1.37179	not present		153.846	99.2556	1.55	regular no dep. Block	BC	4	13	80 pA
animal 21	230822RF1	Nkx2.1cre RCE Syngap1 flox	cHet	M	06.06.22	12	78	-77	160	37	120	22.4	55.7	0.82	30.4	-46.7	0.349828	0.655493	166.972	-76.266	-2.18934	5.92	3.1	-18	0.5	46	0	94	0.711893	1.29885	440	30.6	151.515	87.146	0.575163	fast spiking	BC	4	0	0 pA
animal 21	230822RF3	Nkx2.1cre RCE Syngap1 flox	cHet	M	06.06.22	12	78	-66	268	26	120	31.5	65.6	1.05	48	-32.8	0.417466	0.880729	166.565	-68.3344	-2.4375	6.968	3.5	-17.5	0.85	32	6	72	0.72214	1.33019	440	15	126.582	70.4225	0.556338	fast spiking	BC	4	6	20 pA
animal 21	230822RF4b	Nkx2.1cre RCE Syngap1 flox	cHet	M	06.06.22	12	78	-66	260	33	120	23.3	56	0.92	48.3	-39.3	0.36845	0.876831	156.193	-64.7131	-2.41362	8.58	3.3	-8.4	2.1	34	9	96	0.831541	1.58108	600	7.8	200	101.781	0.508906	fast spiking	BC	4	9	40 pA
animal 22	250822RF2	Nkx2.1cre RCE Syngap1 flox	cHet	M	06.06.22	10	80	-60	175	31	160	240	60	0.79	37.9	-46	0.375157	0.663785	170.33	-89.7436	-1.89796	5.425	2.9	-14.7	0.1	6	6	78	0.902946	1.48864	not present at 600		163.934	112.676	0.687324	fast spiking	BC	4	6	40 pa
animal 23	270722RF4B	Nkx2.1cre RCE Syngap1 flox	cHet	M	20.05.22	4	68	-69	220	27	120	29.5	42.7	0.78	17.5	-29.6	0.349938	0.693097	154.457	-65.0183	-2.37559	5.94	3.4	-16	1.1	2	11	78	0.614191	1.55814	280	20.97	114.943	73.5294	0.639706	fast spiking with depol. Block	BC	4	11	10 Pa
animal 24	090223RF2b	Nkx2,1cre RCE Syngap1 flox	cHet	M	08.11.22	1	93	-64	200	32	160	27.1	64.2	0.97	50.2	-39.8	0.399862	0.843046	189.14	-71.6901	-2.6383	6.4	3.7	-15.5	0.85	28	8	80	0.670455	1.29592	not present		144.928	92.5926	1.56522	regular no dep. Block	BC	4	8	70 pa
Animal 25	280223RF2	Nkx2,1cre RCE Syngap1 flox	cHet	M	22.12.22	0	68	-66	320	34	120	24.8	76.6	1.09	77.8	-36.7	0.453776	1.11078	200.244	-70.8181	-2.82759	10.88	4.2	-12.9	1.22	30	1	62	0.673969	1.36434	480	19.7	120.482	54.6448	2.20482	regular with dep. Block	BC	4	1	20 Pa
Animal 26	220323RF1	Nkx2,1cre RCE Syngap1 flox	cHet	M	13.01.23	3	68	-60	180	40	120	361.8	66.7	0.84	22.8	-37.4	0.357753	0.685535	197.802	-87.5534	-2.25922	7.2	3.5	-23.3	0.37	4	1	68	0.88169	1.02055	not present		147.059	101.523	1.44853	regular no dep. Block	BC	4	1	50 pA
Animal 27	230323RF1	Nkx2,1cre RCE Syngap1 flox	cHet	M	15.01.23	8	67	-65	190	28	160	200.6	57.4	0.79	38.5	-32.2	0.377753	0.701874	178.877	-82.9774	-2.15573	5.32	3.1	-12.8	0.37	8	1	126	0.732297	1.10526			147.059	120.919	1.21618		BC	4	1	60 pA
Animal 27	230323RF2C	Nkx2,1cre RCE Syngap1 flox	cHet	M	15.01.23	8	67	-63	300	30	120	35.7	72.3	1.29	79.4	-37.9	0.529674	1.19209	157.509	-57.6923	-2.73016	9	4.8	-15.7	0.58	22	5	64	0.771509	1.30579	400	11.6	103.093	74.0741	1.39175	regular with dep. Block	BC	4	5
Animal 28	170523RF5	Nkx2,1cre RCE Syngap1 flox	cHet	M	03.03.23	10	75	-73	290	23	120	25	72.2	0.93	50.3	-36.8	0.429411	0.778808	192.613	-83.9438	-2.29455	6.67	3.5	-18.3	0.98	38	8	90	0.825034	1.26374			153.846	103.093	1.49231	regular no dep. Block	BC	4	8	30 pA
Animal 30	050623RF1b	Nkx2,1cre RCE Syngap1 flox	cHet	M	27.03.23	1	70	-62	500	29	80	98.1	53	0.89	24.8	-31.6	0.383501	0.7402	144.383	-70.5128	-2.04762	14.5	4	-17.7	1.43	10	1	56	0.902256	1.13772			123.457	82.6446	1.49383		BC	4	1	40 Pa
Animal 31	060623RF2a	Nkx2,1cre RCE Syngap1 flox	cHet	M	27.03.23	3	71	-63	270	21	160	43.3	67.2	0.91	38.6	-34	0.390385	0.743741	190.476	-82.0622	-2.32112	5.67	3.6	-17.5	0.64	2	4	84	0.831871	1.38636	not present		185.185	112.994	1.63889	regular no dep. Block	BC	4	4	80 pA
Animal 31	060623RF2c	Nkx2,1cre RCE Syngap1 flox	cHet	M	27.03.23	3	71	-64	400	19	120	27.8	52.9	1.3	43.5	-38.1	0.523875	1.11927	111.653	-47.2849	-2.36129	7.6	5.2	-15.5	0.18	28	6	66	0.857732	1.37288	600	2.1	113.636	65.7895	1.72727	regular with dep. Block	BC	4	6	40 pA
Animal 32	080623RF2a	Nkx2,1cre RCE Syngap1 flox	cHet	M	30.03.23	11	70	-75	300	26	160	21	51.2	0.87	22.9	-40.9	0.359408	0.741636	156.899	-66.809	-2.34846	7.8	3.4	-15.2	0.31	42	3	92	0.677543	1.41558	520	-19.1	140.845	87.7193	1.60563	regular with dep. Block	BC	4	3	10 pA
Animal 32	080623RF4	Nkx2,1cre RCE Syngap1 flox	cHet	M	30.03.23	11	70	-65	200	33	160	210	55.6	0.88	32.8	-37.1	0.383804	0.721145	156.288	-74.7863	-2.0898	6.6	3.6	-17.2	0.92	8	8	58	0.795812	1.28777	not present		135.135	68.8231	1.96351	regular no dep. Block	BC	4	8	70 pA
						AVG control		-69.4762	297.143	26.6667	123.81	28.6381	62.4286	0.977143	49.319	-42.119	0.432834	0.860175	168.892	-72.5214	-2.35488	7.95667	3.92381	-15.1905	0.773333	26.4762	7.19048	75.5238	0.759724	1.38263	446.154	20.5	144.583	87.2772	0.920184
						SD		4.02019	81.1876	6.00278	35.5635	21.2249	8.50377	0.206909	18.4472	6.02666	0.0773194	0.207797	31.4669	14.9483	0.273551	3.07719	0.772596	3.11109	0.343079	19.798	6.5086	26.3128	0.0693198	0.149258	123.122	12.765	26.9422	20.1727	0.507478
						SE		0.877277	17.7166	1.30991	7.76059	4.63166	1.85568	0.0451513	4.02552	1.31512	0.0168725	0.045345	6.86663	3.26199	0.0596938	0.671499	0.168594	0.678896	0.074866	4.32028	1.42029	5.74192	0.0155004	0.033375	26.8674	2.78555	6.73556	5.04318	0.126869
						AVG cHet		-66.125	264.562	29.3125	132.5	88.8688	60.5813	0.945	41.4813	-37.3062	0.403128	0.821754	168.15	-72.5129	-2.33674	7.52956	3.675	-16.0125	0.78125	21.25	4.875	79	0.77518	1.3258	470	11.0837	141.981	88.1483	1.29471
						SD		5.005	90.2057	5.64173	24.0832	104.991	9.1388	0.162193	17.8503	4.74587	0.0561286	0.173082	23.1491	11.2676	0.245572	2.3713	0.612645	3.18264	0.519472	15.3167	3.42296	18.0074	0.0913841	0.151794	106.369	14.981	26.0053	19.4148	0.538351
						SE		1.25125	22.5514	1.41043	6.0208	26.2477	2.2847	0.0405483	4.46259	1.18647	0.0140321	0.0432706	5.78727	2.8169	0.0613931	0.592824	0.153161	0.795659	0.129868	3.82916	0.85574	4.50185	0.022846	0.0379485	26.5922	3.74525	6.50132	4.8537	0.134588
						LMM Statistic
						F value		5.895	1.405	1.963	0.731	6.266	0.14	0.295	1.24	7.313	1.513	0.359	0.417	0.938	3.106	0.224	1.12	0.622	0.189	1.166		0.984	1.715	0.434	0.573		0.746	1.061	0.718
						p Value		*0.023	0.244	0.17	0.402	*0.035	0.713	0.593	0.276	*0.01	0.232	0.556	0.525	0.341	0.094	0.639	0.297	0.436	0.667	0.386		0.331	0.202	0.514	0.586		0.396	0.312	0.405
