# Supplementary material for: Syngap1 regulates the synaptic drive and membrane excitability of Parvalbumin-positive interneurons in mouse auditory cortex
Source: eLife. 2025 Aug 14;13:RP97100. doi: 10.7554/eLife.97100 (PMC12352866; doi:10.7554/eLife.97100)
Supplement: Figure 7—source data 1. [file elife-97100-fig7-data1.xlsx]

## Sheet: Sheet1
	SST+ cells in control	SST+ cells in cHet	LMM
	(n=11)	(n=16)
	8 animals	9 animals
Resting membrane potential (mV)	-68.90 ± 1.92	-66.50 ± 1.35	F=1.203
			p=0.283
Input resistance (MΩ )	436.45 ± 68.01	439.56 ± 65.91	F=0.003
			p=0.959
Membrane capacitance (pF)	37.27 ± 1.09	40.87 ± 4.14	F=0.505
			p=0.484
Membrane time constant (ms)	15.05 ± 2.31	17.42 ± 2.83	F=0.466
			p=0.501
Rheobase current (pA)	61.81 ± 11.26	62.50 ± 8.73	F=0.003
			p=0.960
AP threshold (mV)	-43.41 ± 1.71	-47.11± 1.57	F=2.165
			p=0.154
AP amplitude (mV)	61.87 ± 3.05	69.57 ± 2.59	F=2.500
			p=0.126
AP latency (ms)	121.98 ± 34.06	88.08 ± 14.36	F=1.141
			p=0.296
AP half width (ms)	0.94 ± 0.09	1.08 ± 0.08	F=0.980
			p=0.332
fAHP (mV)	-13.13 ± 1.05	-11.58 ± 1.03	F=1.289
			p=0.278
Ih sag ratio	1.44 ± 0.47	0.82 ± 0.08	F=1.557
			p=0.229
SAAR	0.82 ± 0.02 (n=10, 7 animals)	0.75 ± 0.03 (n=15, 9 animals)	F=2.289
			p=0.144
FFAR	2.22 ± 0.52 (n=10, 7 animals)	3.12 ± 0.83 (n=15, 9 animals)	F=1.000
			p=0.403
Firing frequency at 2x rheobase current (Hz)	36.60 ± 6.11 (n=10, 7 animals)	29.86 ± 1.67 (n=15, 9 animals)	F=1.719
			p=0.203
Fmax (Hz)	125.09 ± 9.89 (n=10, 7 animals)	118.84 ± 10.02 (n=14, 8 animals)	F=0.061
			p=0.808
Fss (Hz)	59.42 ± 6.37 (n=10, 7 animals)	47.58 ± 4.92	F=2.428
		(n=14, 8 animals)	p=0.133
