# Supplementary material for: Syngap1 regulates the synaptic drive and membrane excitability of Parvalbumin-positive interneurons in mouse auditory cortex
Source: eLife. 2025 Aug 14;13:RP97100. doi: 10.7554/eLife.97100 (PMC12352866; doi:10.7554/eLife.97100)
Supplement: Figure 7—source data 2. [file elife-97100-fig7-data2.xlsx]

## Sheet: Memb. props SST ctrl vs cHet
	Cell	Mouse Line	Genotype	Sex	DOB	ID	Age	Vm	Rm	Cm	Rheobase, pA	Latency ms	AP ampl, mV	AP thresh, mV	AP dur, ms	AP area	Tau (Cm*Rm)/1000	fAHP, mV	fAHP dur. (ms)	Fmax	Fss	sAHP, mV	spike amplit. AP index At 2x rheobase	spike freq. AP index at 2x rheobase	Firing freq. (n spikes in 500 ms) Hz at 2x rheobase	Current dep. Block	mV dep. Block	Firing	Anatomy	Layer	Tag	File #	Injected current
Animal 1	140722RF2	Nkx2.1cre RCE Syngap1 flox	control	M	03.05.22	2	72	-75	350	40	40	191.4	53.7	-51.1	0.65	22.4	14	-13.6	2.7	105.263	57.971	-12.9	0.889734	1.10454	18	560	25.33	regular	SST	4	GFP	5	0 pA
Animal 2	020822RF1	Nkx2.1cre RCE Syngap1 flox	control	M	30.05.22	1	64	-62	570	27	40	86.3	53.7	-45	0.86	39.9	15.39	-11.4	3.9	144.928	35.2734	-10.3	0.873371	1.43165	26	320	21.03	regular	SST	4	GFP	1	20 pA
Animal 2	020822RF2	Nkx2.1cre RCE Syngap1 flox	control	M	30.05.22	1	64	-64	400	50	80	41.2	67	-44.2	0.61	36.2	20	-12.4	2.1	200	67.5676		0.764341	4.43421	26	520	22.67	regular adapting	SST	4	GFP	2	30 pA
Animal 3	180822RF4	Nkx2.1cre RCE Syngap1 flox	control	M	06.06.22	2	73	-67	260	46	40	102.6	72.1	-50.4	0.96	64.5	11.96	-9.85	3.2	135.135	46.62	-7.1	0.788571	2.79204	20	400	23.6	regular	SST	4	GFP	0	0 pA
Animal 4	190822RF1	Nkx2.1cre RCE Syngap1 flox	control	M	06.06.22	0	74	-78	1000	36	40	79.1	54	-40	0.57	30.9	36	-17.1	2.9	133.333	99.2556	-15	0.934545	1.21939	44	280	31	regular	SST	4	GFP	0	0 pA
Animal 5	220822RF4c	Nkx2.1cre RCE Syngap1 flox	control	M	06.06.22	11	77	-66	460	19	40	61.3	77.3	-36.8	1	70.5	8.74	-16.3	3.6	105.263	65.3595	np	0.896641	1.57895	38	320	14.98	regular	SST	4	GFP	10 folder 220822 second	30 pA
Animal 6	260922RF1a	Nkx2.1cre RCE Syngap1 flox	control	M	01.07.22	569	87	-60	360	35	40	83.6	60	-40.2	1.66	110.3	12.6	-9.9	5	91.7431	33.557	-8	0.743633	5.86154	32	240	15.2	regular	SST	4	GFP	0	20 pA
Animal 6	260922RF1d	Nkx2.1cre RCE Syngap1 flox	control	M	01.07.22	569	87	-76	600	25	80	17.9	68.4	-47.4	1		15	-12.4	3.9	116.279	69.3481	np	0.748563	1.30702	70	360	27.1	regular	SST	4	GFP	5	0 pA
Animal 6	260922RF2a	Nkx2.1cre RCE Syngap1 flox	control	M	01.07.22	569	87	-76	196	67	40	221	63.9	-45.3	1.01	61	13.132	-8.7	3.4	100	44.6429	-6.8	0.849057	1.11893	22	560	15.6	regular	SST	4	GFP	6	20 pA
Animal 7	300922RF1c	Nkx2.1cre RCE Syngap1 flox	control	M	19.07.22	3	73	-70	360	25	80	49.5	68	-44.9	1.1		9	-12.5	4	119.048	74.6269	np	0.777778	1.37838	70			regular	SST	4	GFP	19	20 pA
Animal 8	211024RF3	Nkx2.1cre RCE Syngap1 flox	control	M	06.08.24	5	76	-64	245	40	160	407.9	42.5	-32.3	0.91	11.7	9.8	-20.3	4.2			np				300	31	irregula with block dep.	SST	4	GFP
Animal 9	080722RF5	Nkx2.1cre RCE Syngap1 flox	cHet	M	28.04.22	1	71	-60	240	32	80	57.7	60.8	-43.8	0.7		7.68	-6.3	2.9	188.679	97.0874	-4.9	0.776316	13.495	30	200	28.96	regular	SST	4	GFP	13	50 pA
Animal 10	150722RF1	Nkx2.1cre RCE Syngap1 flox	cHet	M	03.05.22	3	73	-80	400	35	40	94.5	61.8	-49.8	0.97	45.7	14	-15.7	4	106.383	47.619	-15.9	0.849758	1.11382	26	440	24.44	regular	SST	4	GFP	0	0 pA
Animal 10	150722RF2	Nkx2.1cre RCE Syngap1 flox	cHet	M	03.05.22	3	73	-70	350	35	40	94.2	71	-47.2	0.97	66.7	12.25	-12.2	4.1	133.333	29.6736	-12.2	0.910688	1.49875	20	400	28.17	regular	SST	4	GFP	1	0 pA
Animal 10	150722RF5a	Nkx2.1cre RCE Syngap1 flox	cHet	M	03.05.22	3	73	-65	120	35	120	40.9	50.9	-40.6	0.69	29.2	4.2	-8.8	2.8	169.492	42.735	np	0.774257	5.92929	32	440	20.48	regular	SST	4	GFP	8	20 Pa
Animal 11	250722RF1	Nkx2.1cre RCE Syngap1 flox	cHet	M	20.05.22	2	66	-70	345	65	40	76.1	61.2	-50.6	0.77	42.3	22.425	-11.5	3.3	128.205	31.3283	np	0.824013	5.44444	24	320	25.48	regular	SST	4	GFP	1	10 Pa
Animal 12	030822RF2	Nkx2.1cre RCE Syngap1 flox	cHet	M	30.05.22	0	65	-70	700	70	40	68.3	69.3	-41.8	0.63	37.3	49	-18.9	2.3	95.2381	35.461	-13.3	0.678674	1.83534	24	160	34.3	regular	SST	4	GFP	4	40 pA
Animal 13	290822RF2	Nkx2.1cre RCE Syngap1 flox	cHet	M	06.06.22	1	84	-71	1000	28	40	52.5	84.5	-57	1.25	112.7	28	-7.6	4.1	107.527	44.5038	-4.1	0.804935	2.40206	26	440	34.9	regular	SST	4	GFP	4	20 pA
Animal 13	290822RF3	Nkx2.1cre RCE Syngap1 flox	cHet	M	06.06.22	1	84	-62	1000	32	40	22	84.3	-51.3	1.3	110.5	32	-9.8	4.1	88.4956	30.6748	np	0.480192	3.0354	38	160	35.5	regular	SST	4	GFP	5	0 pA
Animal 13	290822RF4d	Nkx2.1cre RCE Syngap1 flox	cHet	M	06.06.22	1	84	-64	400	34	40	82.3	84.1	-49.2	1.11	87.3	13.6	-16.9	3.5			-9.4	0.804994	1.74299	30	440	33.1	regular	SST	4	GFP	9	10 pA
Animal 14	300822RF1	Nkx2.1cre RCE Syngap1 flox	cHet	M	06.06.22	5	85	-72	360	35	40	105.7	61.6	-48.4	1.33	76.9	12.6	-12.2	4.7	87.7193	39.6825	-9.5	0.788961	1.32042	28	320	20.7	regular	SST	4	GFP	2	10 pA
Animal 14	300822RF3	Nkx2.1cre RCE Syngap1 flox	cHet	M	06.06.22	5	85	-63	190	25	120	29.2	62.9	-44.2	0.9		4.75	-14.6	3.5	73.5294	56.1798	np	0.358663	1.60345	30	280	31.1	regular	SST	4	GFP	8	10 pA
Animal 15	270722RF5	Nkx2.1cre RCE Syngap1 flox	cHet	M	20.05.22	4	68	-64	600	25	40	73.2	69.7	-46.8	0.79	48.7	15	-13.5		185.185	75.0751	-8.4	0.838996	2.41485	24	520	19.8	regular	SST	4	GFP	1 folder 260722	20 Pa
Animal 16	221024RF1a	Nkx2.1cre RCE Syngap1 flox	cHet	M	06.08.24	4	77	-60	240	37	140	79.2	61.9	-33.2	1.4	81.1	8.88	-10.2	8	112.36	42.7807	-9.7	0.730081	2.61111	44	not present at 400		regular adapting	SST	4	GFP
Animal 16	221024RF1b	Nkx2.1cre RCE Syngap1 flox	cHet	M	06.08.24	4	77	-61	468	38	80	228.2	71.1	-43.9	1.23	59.8	17.784	-15.6	6.1	87.7193	45.3515	np	0.838068	1.10902	34	420	26.7	regular not adapting with dep. Block	SST	4	GFP
Animal 17	231024RF3a	Nkx2.1cre RCE Syngap1 flox	cHet	M	09.08.24	4	75	-64	220	81	60	89.3	84.2	-59.8	1.51	127.4	17.82	-4.5	10.2	100	48.0769	-4.2	0.844765	1.37186	38	480	30.1	regular not adapting with dep. Block	SST	4	GFP
Animal 17	231024RF4	Nkx2.1cre RCE Syngap1 flox	cHet	M	09.08.24	4	75	-68	400	47	40	216.1	73.9	-46.3	1.76	122.7	18.8	-7.1	12			-4.7							SST	4	GFP
					AVG control			-68.9091	436.455	37.2727	61.8182	121.982	61.8727	-43.4182	0.939091	49.7111	15.0565	-13.1318	3.53636	125.099	59.4222	-10.0167	0.826623	2.22266	36.6	386	22.751
					SD			6.3946	225.571	13.7266	37.3679	112.973	10.1367	5.67377	0.298947	30.1512	7.66704	3.50302	0.797838	31.2974	20.1511	3.35107	0.0698528	1.65068	19.346	119.276	6.09088
					SE			1.92804	68.0122	4.13871	11.2669	34.0625	3.05632	1.71071	0.0901358	9.09092	2.3117	1.0562	0.240557	9.89712	6.37234	1.01039	0.0220894	0.521992	6.11773	35.9629	1.83647
					AVG cHet			-66.5	439.562	40.875	62.5	88.0875	69.575	-47.1187	1.08188	74.8786	17.4243	-11.5875	5.04	118.848	47.5878	-8.75455	0.753557	3.12852	29.8667	358.571	28.1236
					SD			5.41603	263.667	16.5605	34.9285	57.4631	10.3634	6.30558	0.331526	33.2043	11.3556	4.12567	2.84951	37.5095	18.443	3.99108	0.147838	3.21884	6.47927	119.606	5.42155
					SE			1.35401	65.9168	4.14012	8.73212	14.3658	2.59086	1.57639	0.0828815	8.30107	2.83891	1.03142	0.712378	10.0248	4.9291	0.99777	0.0381715	0.8311	1.67294	29.9014	1.35539
					LMM statistic			1.203	0.003	0.505	0.003	1.141	2.5	2.165	0.98	0.329	0.466	1289	1857	0.061	2.428		2289	0.726	1.719	0.335	3.64
					p value			0.283	0.959	0.484	0.96	0.296	0.126	0.154	0.332	0.577	0.501	0.278	0.191	0.808	0.133		0.144	0.403	0.203	0.568	0.075
