# Supplementary material for: Syngap1 regulates the synaptic drive and membrane excitability of Parvalbumin-positive interneurons in mouse auditory cortex
Source: eLife. 2025 Aug 14;13:RP97100. doi: 10.7554/eLife.97100 (PMC12352866; doi:10.7554/eLife.97100)
Supplement: Figure 8—source data 1. [file elife-97100-fig8-data1.xlsx]

## Sheet: Sheet1
	(1) PV+ cells in control	(2) PV+ cells in control + α-DTX	(3) PV+ cells in cHet	(4) PV+ cells in cHet + α-DTX	LMM	LMM	LMM	LMM
	(n=9)	(n=11)	(n=23)	(n=18)	1 Vs 2	1 Vs 3	1 Vs 4	3 Vs 4
	4 animals	6 animals	10 animals	8 animals
Resting membrane potential (mV)	-66.77 ± 0.95	-71.09 ± 2.02	-68.91 ± 1.22	-66.83 ± 1.48	p=0.143	p=0.293	p=0.973	p=0.320
Input resistance (MΩ )	281.11 ± 36.45	357.27 ± 63.01	274.13 ± 16.49	258.88 ± 20.92	p=0.313	p=0.837	p=0.560	p=0.555
Membrane capacitance (pF)	26.77 ± 2.05	27.18 ± 1.36	28.82 ± 1.19	29.27 ± 1.50	p=0.860	p=0.366	p=0.322	p=0.874
Membrane time constant (ms)	7.33 ± 1.00	9.34 ± 1.56	7.71 ± 0.44	7.48 ± 0.63	p=0.500	p=0.400	p=0.602	p=0.329
Rheobase current (pA)	142.22 ± 16.48	123.63 ± 10.02	166.95 ± 13.22	144.44 ± 12.99	p=0.520	p=0.308	p=0.833	p=0.263
AP threshold (mV)	-42.97 ± 2.68	-42.50 ± 1.60	-36.22 ± 1.67	-43.27 ± 2.30	p=0.871	*p=0.049	p=0.940	*p=0.022
AP amplitude (mV)	63.38 ± 2.54	64.10 ± 2.25	60.77 ± 1.75	61.89 ± 2.03	p=0.856	p=0.457	p=0.690	p=0.672
AP latency (ms)	45.72 ± 11.66	54.87 ± 13.57	89.96 ± 21.41	56.67 ± 7.03	p=0.606	p=0.686	p=0.329	p=0.093
AP half-width (ms)	1.05 ± 0.09	0.89 ± 0.05	0.81 ± 0.04	0.80 ± 0.03	p=0.114	*p=0.032	*p=0.039	p=0.783
fAHP (mV)	-15.07 ± 1.10	-14.41 ± 0.98	-16.66 ± 0.69	-12.28 ± 0.80	p=0.871	p=0.220	*p=0.046	***p<0.001
Ih sag (mV)	0.93 ± 0.14	0.68 ± 0.12	0.56 ± 0.07	0.63 ± 0.11	p=0.645	*p=0.047	p=0.118	p=0.575
SAAR	0.78 ± 0.02	0.82 ± 0.01	0.76 ± 0.02	0.82 ± 0.02	p=0.295	p=0.558	p=0.349	p=0.083
FFAR	1.32 ± 0.06	1.33 ± 0.06	1.27 ± 0.02	1.25 ± 0.03	p=0.886	p=0.344	p=0.279	p=0.572
				(n=17)
Firing frequency at 2x rheobase current (Hz)	76.66 ± 9.07	80.90 ± 7.61	96.34 ± 6.13	86.77 ± 5.80	p=0.505	p=0.112	p=0.385	p=0.290
Fmax (Hz)	142.99 ± 10.14	160.34 ± 12.64	157.79± 6.41	175.29 ± 9.65 (n=16)	p=0.078	p=0.279	p=0.065	p=0.115
	(n=6)
Fss (Hz)	91.16 ± 8.28	98.80 ± 10.91	106.37 ± 5.39	114.46 ± 6.33 (n=16)	p=0.178	p=0.220	p=0.057	p=0.327
	(n=6)
