# Supplementary material for: Syngap1 regulates the synaptic drive and membrane excitability of Parvalbumin-positive interneurons in mouse auditory cortex
Source: eLife. 2025 Aug 14;13:RP97100. doi: 10.7554/eLife.97100 (PMC12352866; doi:10.7554/eLife.97100)
Supplement: Figure 8—source data 2. [file elife-97100-fig8-data2.xlsx]

## Sheet: Memb props. No DTX VS DTX BC l4
Subject ID	Condition	Cell	Mouse Line	Sex	Genotype	DOB	ID	Age	Vm	Rm	Cm	Rheobase, pA	Latency ms	AP ampl, mV	AP area	AP dur, ms	AP thresh, mV	Rise time (10-90%)	Decay time (10-90%)	Max, rise slop (mv/ms)	Max, decay slope (mv/ms)	Ratio max ris/max decay	Tau (Rm*Cm)/1000	fAHP time (ms)	AHP amplit,, mV	Sag Ih	Firing frequ, At rheobase	File #	Firing freq, (n spikes in 500 ms) Hz at 2x rheobase	spike amplit, AP index At 2x rheobase	spike freq, AP index at 2x rheobase	Fmax	Fss	Adaptation ratio (dimensionless)	Firing	Anatomy	Layer	Tag	File #	Injected current
Animal 3	No	150223RF1a	Nkx2,1cre RCE Syngap1 flox	M	Control	20.11.22	1204	87	-70	160	33	80	27.3	60.8	58.1	1.17	-52.9	0.438032	1.06424	147.741	-51.2821	-2.88095	5.28	5	-12.4	0.76	2	1	50	0.766055	1.30435					BC	4	GFP	1	0 Pa
Animal 6	No	200323RF2a	Nkx2,1cre RCE Syngap1 flox	M	Control	13.01.23	4	66	-70	350	25	120	21.5	69.4	67.1	1.21	-47.2	0.521982	1.05747	156.593	-61.3553	-2.55224	8.75	4.5	-15.9	0.76	32	3	66	0.803672	1.41228	128.205	73.1529	1.75256	regular no dep. Block	BC	4	GFP	3	50 Pa
Animal 6	No	200323RF2d	Nkx2,1cre RCE Syngap1 flox	M	Control	13.01.23	4	66	-63	280	20	120	22.4	72.3	100.4	1.62	-44.1	0.604256	1.55014	132.173	-43.6508	-3.02797	5.6	5.8	-15.8	0.85	28	5	56	0.74965	1.57252					BC	4	GFP	5	50 pA
Animal 11	No	230522RF1b	Nkx2,1cre RCE Syngap1 flox	M	Control	18.03.23	2	66	-68	480	30	80	34.3	67.7	66.3	1.32	-43.4	0.602963	1.12713	132.173	-56.1661	-2.35326	14.4	5	-18.7	0.52	24	2	54	0.781792	1.30719	96.1538	58.1395	1.65385	regular with dep. Block	BC	4	GFP	2	20 pA
Animal 11	No	230522RF2	Nkx2,1cre RCE Syngap1 flox	M	Control	18.03.23	2	66	-66	190	22	160	56.5	74.1	53	0.85	-39.3	0.373704	0.751389	215.985	-93.6547	-2.30619	4.18	3	-15.9	1.1	6	3	70	0.863014	1.58947	156.25	86.2069	1.8125	regular no dep. Block	BC	4	GFP	3	80 Pa
Animal 16	No	070623RF1c	Nkx2,1cre RCE Syngap1 flox	M	Control	30.03.23	8	72	-63	250	23	200	6.3	52.9	43.1	0.84	-54.2	0.39489	0.815317	161.783	-68.6813	-2.35556	5.75	3	-8.1	0.52	82	2	136	0.668519	1.32203	178.571	129.87	1.375		BC	4	GFP	2	100 pA
Animal 16	No	070623RF1d	Nkx2,1cre RCE Syngap1 flox	M	Control	30.03.23	8	72	-70	170	37	200	96.7	59.5	31.2	0.69	-41.9	0.32737	0.591515	189.866	-99.2064	-1.91385	6.29	2.8	-13.4	0.67	6	4	74	0.923588	1	144.928	100.341	1.44435	regular no dep. Block	BC	4	GFP	4	80 pA
Animal 16	No	070623RF4a	Nkx2,1cre RCE Syngap1 flox	M	Control	30.03.23	8	69	-65	400	20	120	108	57.6	28	0.91	-34.6	0.427761	0.748597	143.162	-73.5653	-1.94606	8	3.9	-17.6	1.5	28	11	84	0.82906	1.02586					BC	4	GFP	11	50 pA
Animal 16	No	070623RF4b	Nkx2,1cre RCE Syngap1 flox	M	Control	30.03.23	8	69	-66	250	31	200	38.5	56.2	16.6	0.84	-29.2	0.365282	0.700843	172.772	-73.2601	-2.35833	7.75	4.2	-17.9	1.71	28	13	100	0.704319	1.37179	153.846	99.2556	1.55	regular no dep. Block	BC	4	GFP	13	80 pA
Animal 3	Drug	150223RF2a	Nkx2,1cre RCE Syngap1 flox	M	Control	20.11.22	1204	87	-64	360	26	80	176.7	60.6	55.1	1.19	-40.6	0.509228	1.08207	140.024	-53.0811	-2.63793	9.36	4.9	-12.8	0.21	8	5	42	0.9	1.16837	112.36	57.5705	1.95169		BC	4	GFP	5	50 pA
Animal 3	Drug	150223RF4a	Nkx2,1cre RCE Syngap1 flox	M	Control	20.11.22	1204	87	-63	320	27	120	41.4	64.9	51.5	1.07	-37.4	0.412756	0.921967	176.74	-65.5888	-2.69467	8.64	4.7	-16.1	1.59	22	19	56	0.734815	1.72807	112.36	55.4017	2.02809		BC	4	GFP	19	90 Pa
Animal 3	Drug	150223RF4b	Nkx2,1cre RCE Syngap1 flox	M	Control	20.11.22	1204	87	-67	260	28	120	37.1	68.8	47.5	1.02	-43.7	0.426452	0.870187	184.869	-73.8706	-2.5026	7.28	4.7	-17.4	0.46	24	22	60	0.795487	1.36434	117.647	71.4286	1.64706	regular no dep. Block	BC	4	GFP	22	60 Pa
Animal 5	Drug	010323RF2a	Nkx2,1cre RCE Syngap1 flox	M	Control	22.12.22	1	69	-82	300	20	80	43	61.5	32.8	0.84	-53.4	0.337935	0.711603	195.055	-79.0598	-2.46718	6	3.2	-16.2	0.55	24	7	70	0.803432	1.41964	156.25	95.2381	1.64063	regular no dep. Block	BC	4	GFP	7	10 Pa
Animal 6	Drug	200323RF1	Nkx2,1cre RCE Syngap1 flox	M	Control	13.01.23	4	66	-71	250	30	120	36.1	66.5	34	0.76	-44.8	0.343354	0.636347	201.465	-96.1538	-2.09524	7.5	2.9	-19.9	0.7	32	2	76	0.882615	1.12389	158.73	100.756	1.5754	regular no dep. Block	BC	4	GFP	2	30 Pa
Animal 10	Drug	180523RF1b	Nkx2,1cre RCE Syngap1 flox	M	Control	03.03.23	7	76	-73	580	18	80	30.9	59.8	48.4	1.09	-40.6	0.442134	0.902155	151.404	-62.5763	-2.41951	10.44	4.1	-14.2	0.79	34	4	74	0.726821	1.5	135.135	75.188	1.7973	regular with dep. Block	BC	4	GFP	4	20 pA
Animal 10	Drug	180523RF1c	Nkx2,1cre RCE Syngap1 flox	M	Control	03.03.23	7	76	-73	280	29	160	38.6	62.5	34.5	0.73	-42	0.349131	0.660407	204.823	-91.2142	-2.24552	8.12	2.8	-13.1	0.24	40	5	116	0.849445	1.24658	204.082	129.87	1.57143	regular no dep. Block	BC	4	GFP	5	20 pA
Animal 11	Drug	230522RF4	Nkx2,1cre RCE Syngap1 flox	M	Control	18.03.23	2	66	-65	160	32	160	101	82.7	59.2	0.82	-34.4	0.393489	0.719638	226.19	-114.469	-1.976	5.12	2.9	-15.6	0.4	8	8	78	0.890566	1.58824	181.818	107.527	1.69091	regular no dep. Block	BC	4	GFP	8	110 pA
Animal 16	Drug	070623RF2	Nkx2,1cre RCE Syngap1 flox	M	Control	30.03.23	8	69	-78	220	32	160	32.6	59.4	28.6	0.59	-46.1	0.28924	0.538179	208.486	-109.28	-1.90782	7.04	2.5	-11	1.16	42	5	124	0.825886	1.08219	243.902	180.18	1.35366	fast spiking real	BC	4	GFP	5	70 pA
Animal 16	Drug	070623RF3b	Nkx2,1cre RCE Syngap1 flox	M	Control	30.03.23	8	69	-66	300	30	160	36.5	53.1	48.3	1.02	-37.5	0.378543	1.02351	154.973	-51.8926	-2.98641	9	4.6	-7.7	0.98	32	10	96	0.750476	1.42105	149.254	92.8074	1.60821	regular no dep. Block	BC	4	GFP	10	80 pA
Animal 16	Drug	070623RF5a	Nkx2,1cre RCE Syngap1 flox	M	Control	30.03.23	8	69	-80	900	27	120	29.7	65.4	34.5	0.74	-47.1	0.339469	0.635533	203.783	-94.6276	-2.15352	24.3	3	-14.6	0.4	40	14 et 15	98	0.861111	1.09677	192.308	120.919	1.59038	regular no dep. Block	BC	4	GFP	14 et 15	0 pA
Animal 4	No	280223RF2	Nkx2,1cre RCE Syngap1 flox	M	cHET	22.12.22	0	68	-66	320	34	120	24.8	76.6	77.8	1.09	-36.7	0.453776	1.11078	200.244	-70.8181	-2.82759	10.88	4.2	-12.9	1.22	30	1	62	0.673969	1.36434	120.482	54.6448	2.20482	regular with dep. Block	BC	4	GFP	1	20 Pa
animal 1	No	090223RF2a	Nkx2,1cre RCE Syngap1 flox	M	cHET	08.11.22	1	93	-82	280	35	40	35.5	70.7	35	0.7	-58.2	0.352156	0.537698	213.065	-115.079	-1.85146	9.8	2.8	-20.6	0.32	6	5	54	0.911609	1.06832	172.414	115.207	1.49655	regular with dep. Block	BC	4	GFP	5	plus 10 Pa
animal 1	No	090223RF2b	Nkx2,1cre RCE Syngap1 flox	M	cHET	08.11.22	1	93	-64	200	32	160	27.1	64.2	50.2	0.97	-39.8	0.399862	0.843046	189.14	-71.6901	-2.6383	6.4	3.7	-15.5	0.85	28	8	80	0.670455	1.29592	144.928	92.5926	1.56522	regular no dep. Block	BC	4	GFP	8	70 pa
Animal 8	No	230323RF1	Nkx2,1cre RCE Syngap1 flox	M	cHET	15.01.23	8	67	-65	190	28	160	200.6	57.4	38.5	0.79	-32.2	0.377753	0.701874	178.877	-82.9774	-2.15573	5.32	3.1	-12.8	0.37	8	1	126	0.732297	1.10526	147.059	120.919	1.21618		BC	4	GFP	1	60 pA
Animal 8	No	230323RF2C	Nkx2,1cre RCE Syngap1 flox	M	cHET	15.01.23	8	67	-63	300	30	120	35.7	72.3	79.4	1.29	-37.9	0.529674	1.19209	157.509	-57.6923	-2.73016	9	4.8	-15.7	0.58	22	5	64	0.771509	1.30579	103.093	74.0741	1.39175	regular with dep. Block	BC	4	GFP	5
Animal 9	No	170523RF1	Nkx2,1cre RCE Syngap1 flox	M	cHET	03.03.23	10	75	-66	250	35	240	14.6	54.9	31	0.72	-32.9	0.334105	0.572204	174.603	-94.0171	-1.85714	8.75	2.7	-15.3	0.52	70	0	130	0.495575	1.58182	181.818	120.482	1.50909	regular no dep. Block	BC	4	GFP	0	50 pA
Animal 7	No	220323RF1	Nkx2,1cre RCE Syngap1 flox	M	cHET	13.01.23	3	68	-60	180	40	120	361.8	66.7	22.8	0.84	-37.4	0.357753	0.685535	197.802	-87.5534	-2.25922	7.2	3.5	-23.3	0.37	4	1	68	0.88169	1.02055	147.059	101.523	1.44853	regular no dep. Block	BC	4	GFP	1	50 pA
Animal 9	No	170523RF5	Nkx2,1cre RCE Syngap1 flox	M	cHET	03.03.23	10	75	-73	290	23	120	25	72.2	50.3	0.93	-36.8	0.429411	0.778808	192.613	-83.9438	-2.29455	6.67	3.5	-18.3	0.98	38	8	90	0.825034	1.26374	153.846	103.093	1.49231	regular no dep. Block	BC	4	GFP	8	30 pA
Animal 13	No	010623RF1a	Nkx2,1cre RCE Syngap1 flox	M	cHET	27.03.23	2	66	-73	340	26	120	27.5	53.7	22.6	0.72	-40.4	0.318761	0.594573	186.508	-86.9963	-2.14386	8.84	3	-18.1	0.61	4	0	92	0.833893	1.19565	166.667	116.279	1.43333	regular with dep. Block	BC	4	GFP	0	10 pA
Animal 13	No	010623RF4	Nkx2,1cre RCE Syngap1 flox	M	cHET	27.03.23	2	66	-73	190	28	240	19	50.2	19.3	0.68	-39.3	0.314234	0.552414	171.856	-89.1331	-1.92808	5.32	2.8	-17.4	0.27	50	8	134	0.61326	1.2459	163.934	129.87	1.2623	regular no dep. Block	BC	4	GFP	8	50 Pa
Animal 14	No	050623RF1a	Nkx2,1cre RCE Syngap1 flox	M	cHET	27.03.23	1	70	-64	220	31	280	97.1	65.1	25.5	0.65	-20.6	0.314683	0.540538	233.679	-112.637	-2.07461	6.82	2.7	-19.6	1.04	26	0	114	0.650957	1.15584	140.845	109.89	1.28169	regular no dep. Block	BC	4	GFP	0	110 pA
Animal 14	No	050623RF1b	Nkx2,1cre RCE Syngap1 flox	M	cHET	27.03.23	1	70	-62	500	29	80	98.1	53	24.8	0.89	-31.6	0.383501	0.7402	144.383	-70.5128	-2.04762	14.5	4	-17.7	1.43	10	1	56	0.902256	1.13772	123.457	82.6446	1.49383		BC	4	GFP	1	40 Pa
Animal 14	No	050623RF4	Nkx2,1cre RCE Syngap1 flox	M	cHET	27.03.23	1	70	-75	375	25	120	51	65.5	34	0.65	-43.4	0.351308	0.547233	205.433	-115.314	-1.78151	9.375	2.6	-14.3	0.1	24	6	108	0.932432	1.11905	227.273	161.29	1.40909	fast spiking real	BC	4	GFP	6	20 pA
Animal 14	No	050623RF5	Nkx2,1cre RCE Syngap1 flox	M	cHET	27.03.23	1	70	-71	270	21	160	30.2	53.7	26.3	0.66	-35.5	0.297083	0.540137	183.038	-91.5751	-1.99878	5.67	3.6	-20.7	0.73	2	9	102	0.850082	1.21519	196.078	121.951	1.60784	fast spiking real	BC	4	GFP	9	30 PA
Animal 15	No	060623RF2a	Nkx2,1cre RCE Syngap1 flox	M	cHET	27.03.23	3	71	-63	270	21	160	43.3	67.2	38.6	0.91	-34	0.390385	0.743741	190.476	-82.0622	-2.32112	5.67	3.6	-17.5	0.64	2	4	84	0.831871	1.38636	185.185	112.994	1.63889	regular no dep. Block	BC	4	GFP	4	80 pA
Animal 15	No	060623RF2c	Nkx2,1cre RCE Syngap1 flox	M	cHET	27.03.23	3	71	-64	400	19	120	27.8	52.9	43.5	1.3	-38.1	0.523875	1.11927	111.653	-47.2849	-2.36129	7.6	5.2	-15.5	0.18	28	6	66	0.857732	1.37288	113.636	65.7895	1.72727	regular with dep. Block	BC	4	GFP	6	40 pA
Animal 17	No	080623RF2a	Nkx2,1cre RCE Syngap1 flox	M	cHET	30.03.23	11	70	-75	300	26	160	21	51.2	22.9	0.87	-40.9	0.359408	0.741636	156.899	-66.809	-2.34846	7.8	3.4	-15.2	0.31	42	3	92	0.677543	1.41558	140.845	87.7193	1.60563	regular with dep. Block	BC	4	GFP	3	10 pA
Animal 17	No	080623RF2b	Nkx2,1cre RCE Syngap1 flox	M	cHET	30.03.23	11	70	-72	200	37	240	101.6	65.2	38.5	0.72	-42.1	0.454414	0.5895	178.462	-104.942	-1.70058	7.4	2.9	-13.9	0.15	40	4	120	0.716237	1.18056	153.846	111.732	1.37692	regular no dep. Block	BC	4	GFP	4	40 pA
Animal 17	No	080623RF4	Nkx2,1cre RCE Syngap1 flox	M	cHET	30.03.23	11	70	-65	200	33	160	210	55.6	32.8	0.88	-37.1	0.383804	0.721145	156.288	-74.7863	-2.0898	6.6	3.6	-17.2	0.92	8	8	58	0.795812	1.28777	135.135	68.8231	1.96351	regular no dep. Block	BC	4	GFP	8	70 pA
Animal 18	No	090623RF3a	Nkx2,1cre RCE Syngap1 flox	M	cHET	30.03.23	7	71	-71	200	26	280	324.5	59.5	33.4	0.63	-28.4	0.338518	0.573724	197.376	-108.669	-1.81631	5.2	2.5	-10.1	0.15	2	6 et 7	148	0.761682	1.41176	196.078	138.889	1.41176	regular no dep. Block	BC	4	GFP	6 et 7	150 pA
Animal 18	No	090623RF3b	Nkx2,1cre RCE Syngap1 flox	M	cHET	30.03.23	7	71	-73	280	26	200	231.7	52	9.22	0.66	-32.6	0.281446	0.552061	193.716	-88.5226	-2.18832	7.28	2.7	-17.3	0.31	20	8 et 9	106	0.684906	1.35135	144.928	96.1538	1.50725	regular with dep. Block	BC	4	GFP	8 et 9	90 pA
Animal 18	No	090623RF4	Nkx2,1cre RCE Syngap1 flox	M	cHET	30.03.23	7	71	-66	320	22	200	42.5	48.7	3.87	0.65	-16.5	0.316752	0.50185	161.477	-90.299	-1.78825	7.04	3	-22.6	0.76	28	10	124	0.663669	1.375	166.667	125	1.33333	regular with dep. Block	BC	4	GFP	10	100 pA
Animal 18	No	090623RF6	Nkx2,1cre RCE Syngap1 flox	M	cHET	30.03.23	7	71	-79	230	36	240	18.7	69.4	35.8	0.61	-40.7	0.289635	0.563314	261.905	-120.879	-2.16667	8.28	2.4	-11.8	0.1	28	13	138	0.846591	1.40741	204.082	135.135	1.5102	fast spiking real	BC	4	GFP	13	20 pA
Animal 7	Drug	220323RF2	Nkx2,1cre RCE Syngap1 flox	M	cHET	13.01.23	3	68	-60	380	21	80	60.3	60	58.3	1.3	-39.6	0.631397	1.02858	103.48	-53.6913	-1.92731	7.98	4.7	-16.9	2.17	16	3	54	0.644068	1.17964	76.3359	58.4795	1.30534	regular with dep. Block	BC	4	GFP	3	50 pa
Animal 9	Drug	170523RF2b	Nkx2,1cre RCE Syngap1 flox	M	cHET	03.03.23	10	75	-67	240	26	160	34.1	55.6	39.4	0.92	-40.9	0.363166	0.840266	154.762	-62.8816	-2.46117	6.24	3.6	-11.9	0.32	24	2	90							BC	4	GFP	2	60 pA
Animal 9	Drug	170523RF2c	Nkx2,1cre RCE Syngap1 flox	M	cHET	03.03.23	10	75	-63	170	34	200	61.8	61.4	41.4	0.79	-37	0.319276	0.73765	211.844	-81.147	-2.61062	5.78	3.1	-11.8	0.64	14	3	94	0.799035	1.38158	175.439	112.36	1.5614	regular no dep. Block	BC	4	GFP	3	90 pA
Animal 9	Drug	170523RF4	Nkx2,1cre RCE Syngap1 flox	M	cHET	03.03.23	10	75	-62	170	39	160	38.4	78.6	58.4	0.73	-46	0.344966	0.722937	237.485	-110.433	-2.15048	6.63	2.7	-4.9	0.46	10	6	66	0.947289	1.14925	153.846	123.457	1.24615	regular no dep. Block	BC	4	GFP	6	110 pA
Animal 13	Drug	010623RF2a	Nkx2,1cre RCE Syngap1 flox	M	cHET	27.03.23	2	66	-60	170	28	160	34.4	64.9	63.5	0.78	-56.8	0.374071	1.0872	196.766	-86.0281	-2.28723	4.76	3.3	-7.4	0.12	16	2	108	0.82646	1.09877					BC	4	GFP	2	150 Pa
Animal 13	Drug	010623RF2b	Nkx2,1cre RCE Syngap1 flox	M	cHET	27.03.23	2	66	-64	220	18	200	89.5	54.3	23.9	0.53	-44.3	0.262654	0.480883	207.139	-113.179	-1.83019	3.96	2.1	-11.1	1.1	24	3 et 4	132	0.883333	1.22951	227.273	169.492	1.34091	fast spiking real	BC	4	GFP	3 et 4	80 pA
Animal 13	Drug	010623RF3a	Nkx2,1cre RCE Syngap1 flox	M	cHET	27.03.23	2	66	-60	390	30	120	53.7	61.7	35.6	0.79	-28.4	0.327284	0.680522	199.939	-83.5876	-2.39197	11.7	3	-16	1.1	18	5	94	0.896272	1.24138	200	111.732	1.79	fast spiking real	BC	4	GFP	5	70 pA
Animal 14	Drug	050623RF2a	Nkx2,1cre RCE Syngap1 flox	M	cHET	27.03.23	1	70	-68	240	25	160	57.7	53.9	27.5	0.81	-33.2	0.334535	0.69627	172.466	-73.5653	-2.3444	6	3.4	-13.2	0.76	22	2	98	0.839779	1.25641	175.439	106.667	1.64474	regular no dep. Block	BC	4	GFP	2	60 pa
Animal 14	Drug	050623RF2b	Nkx2,1cre RCE Syngap1 flox	M	cHET	27.03.23	1	70	-66	220	33	200	28.8	55.9	31.1	0.83	-37.9	0.32763	0.764471	179.988	-70.1647	-2.56522	7.26	3.7	-13.1	0.79	32	3	94	0.695652	1.45833	161.29	95.6938	1.68548	regular no dep. Block	BC	4	GFP	3	60 pa
Animal 14	Drug	050623RF3b	Nkx2,1cre RCE Syngap1 flox	M	cHET	27.03.23	1	70	-60	220	21	120	53.5	44.2	27.6	0.82	-42.7	0.351124	0.739614	138.278	-60.4027	-2.28928	4.62	3.1	-13.3	0.27	22	5	82	0.899782	1.5	217.391	119.048	1.82609	regular no dep. Block	BC	4	GFP	5	90 pA
Animal 14	Drug	050623RF6	Nkx2,1cre RCE Syngap1 flox	M	cHET	27.03.23	1	70	-73	370	25	160	39.6	62.5	38.3	0.79	-38.1	0.352807	0.720375	201.342	-83.6386	-2.40729	9.25	3.4	-11.2	0.92	36	10	116	0.73913	1.40909	175.439	113.636	1.54386		BC	4	GFP	10	40 pA
Animal 15	Drug	060623RF1	Nkx2,1cre RCE Syngap1 flox	M	cHET	27.03.23	3	71	-78	290	31	80	53	76.5	78.6	1.03	-54.8	0.425091	1.00599	194.631	-76.0073	-2.56069	8.99	3.4	-6.2	0.55	14	3	34	0.927098	1.08362	153.846	101.399	1.51723	regular no dep. Block	BC	4	GFP	3	60 PA
Animal 17	Drug	080623RF1	Nkx2,1cre RCE Syngap1 flox	M	cHET	30.03.23	11	70	-76	260	40	120	123.3	70.6	35.4	0.63	-47.5	0.326748	0.542451	244.505	-123.016	-1.98759	10.4	2.5	-13.6	0.27	12	1	96	0.825916	0.929204	196.078	135.135	1.45098	fast spiking real	BC	4	GFP	1	10 pA
Animal 17	Drug	080623RF3	Nkx2,1cre RCE Syngap1 flox	M	cHET	30.03.23	11	70	-70	450	30	80	128.2	63.9	27.8	0.84	-45.7	0.350396	0.797833	185.897	-77.5336	-2.39764	13.5	4.1	-15.9	0.55	8	7	46	0.943425	1.31638	142.857	90.9091	1.57143	regular with dep. Block	BC	4	GFP	7	20 pA
Animal 18	Drug	090623RF2B	Nkx2,1cre RCE Syngap1 flox	M	cHET	30.03.23	7	71	-64	200	40	280	40	57.3	28.2	0.82	-23.9	0.362077	0.691087	164.124	-76.0073	-2.15932	8	3.5	-16	0.64	34	5	104	0.55536	1.43243	136.986	94.3396	1.45205	regular no dep. Block	BC	4	GFP	5	100 pA
Animal 18	Drug	090623RF5	Nkx2,1cre RCE Syngap1 flox	M	cHET	30.03.23	7	71	-78	280	30	160	30.8	54.8	27.8	0.62	-45.3	0.311603	0.560004	192.918	-98.2906	-1.96273	8.4	2.8	-11.6	0.31	40	11	96	0.873626	1.2	227.273	147.059	1.54545	regular no dep. Block	BC	4	GFP	11	20 Pa
animal 1	Drug	090223RF1b	Nkx2,1cre RCE Syngap1 flox	M	cHET	08.11.22	1	93	-72	270	30	80	67.3	67.7	36.6	0.69	-59.9	0.329048	0.598419	213.98	-107.448	-1.99148	8.1	2.7	-15.7	0.27	14	3	72	0.919818	1.0873	200	131.579	1.52	regular no dep. Block	BC	4	GFP	3	30 pA
animal 1	Drug	090223RF3c	Nkx2,1cre RCE Syngap1 flox	M	cHET	08.11.22	1	93	-62	120	26	80	25.7	70.3	51.5	0.79	-57	0.391629	0.70782	207.57	-99.756	-2.08078	3.12	3	-11.4	0.2	18	11	86	0.824859	1.42391	185.185	120.482	1.53704	regular with dep. Block	BC	4	GFP	11	110 Pa
								AVG Control no drug	-66.7778	281.111	26.7778	142.222	45.7222	63.3889	51.5333	1.05	-42.9778	0.450693	0.934071	161.361	-68.9802	7.33333	-2.41049	4.13333	-15.0778	0.932222	26.2222	4.88889	76.6667	0.787741	1.32283	142.992	91.161	1.59804	#DIV/0!
								SD	2.86259	109.367	6.15991	49.4413	35.0003	7.63126	25.3779	0.298998	8.0495	0.102519	0.296352	27.7713	18.5035	3.02742	0.371644	1.05	3.31654	0.422811	23.884	4.22624	27.2397	0.0784309	0.205195	28.1982	24.8493	0.17243	#DIV/0!
								SE	0.954198	36.4556	2.0533	16.4804	11.6668	2.54375	8.45931	0.0996661	2.68317	0.0341729	0.098784	9.25711	6.16782	1.00914	0.123881	0.35	1.10551	0.140937	7.96133	1.40875	9.07989	0.0261436	0.0683982	9.3994	8.28311	0.0574768	#DIV/0!
								AVG Control DTX	-71.0909	357.273	27.1818	123.636	54.8727	64.1091	43.1273	0.897273	-42.5091	0.383794	0.791055	186.165	-81.0739	9.34545	-2.37149	3.66364	-14.4182	0.68	27.8182	8.7	80.9091	0.82006	1.33992	160.35	98.8078	1.6777	#DIV/0!
								SD	6.70007	209.002	4.51261	33.2484	45.0191	7.47856	10.4658	0.189214	5.32681	0.0614513	0.177488	27.3361	21.6743	5.18641	0.330653	0.930884	3.28019	0.423981	11.9148	6.63409	25.2565	0.0628806	0.214904	41.9329	36.1883	0.188108	#DIV/0!
								SE	2.02015	63.0165	1.3606	10.0248	13.5738	2.25487	3.15555	0.0570501	1.60609	0.0185282	0.0535146	8.24216	6.53505	1.56376	0.0996955	0.280672	0.989014	0.127835	3.59246	2.00025	7.61512	0.0189592	0.0647959	12.6433	10.9112	0.0567168	#DIV/0!	0
								AVG cHet no drug	-68.913	274.13	28.8261	166.957	89.9609	60.7783	34.6126	0.817826	-36.2217	0.371839	0.697538	184.218	-87.5737	7.7137	-2.1465	3.31739	-16.6652	0.561304	22.6087	4.80952	96.3478	0.764394	1.27234	157.798	106.378	1.51684	#DIV/0!
								SD	5.86913	79.1238	5.74972	63.4203	102.704	8.41703	17.8361	0.197851	8.03735	0.0684129	0.19966	30.5445	19.1625	2.12689	0.303658	0.725291	3.3312	0.377519	17.7501	3.78971	29.4412	0.111176	0.136635	30.7716	25.8752	0.220117	#DIV/0!
								SE	1.2238	16.4984	1.1989	13.224	21.4153	1.75507	3.71909	0.0412548	1.6759	0.0142651	0.0416321	6.36898	3.99565	0.443486	0.0633171	0.151234	0.694604	0.0787183	3.70116	0.790209	6.13891	0.0231817	0.0284903	6.41632	5.39536	0.0458975	#DIV/0!
								AVG cHet DTX	-66.8333	258.889	29.2778	144.444	56.6722	61.8944	40.6056	0.806111	-43.2778	0.360306	0.744576	189.284	-85.3765	7.48278	-2.24474	3.22778	-12.2889	0.635556	20.7778	4.82353	86.7778	0.825936	1.25746	175.292	114.467	1.53364	#DIV/0!
								SD	6.29893	88.7753	6.36909	55.1172	29.8362	8.64839	15.3085	0.166632	9.79048	0.0758715	0.163845	34.0163	19.47	2.70192	0.241795	0.600789	3.40879	0.485898	9.33403	3.20615	24.6208	0.110471	0.160776	38.6047	25.3499	0.158105	#DIV/0!
								SE	1.48467	20.9245	1.50121	12.9913	7.03245	2.03845	3.60825	0.0392756	2.30764	0.0178831	0.0386186	8.01773	4.58913	0.636848	0.0569916	0.141607	0.80346	0.114527	2.20005	0.755697	5.80317	0.0260382	0.0378953	9.09922	5.97502	0.0372656	#DIV/0!
