# Supplementary material for: Syngap1 regulates the synaptic drive and membrane excitability of Parvalbumin-positive interneurons in mouse auditory cortex
Source: eLife. 2025 Aug 14;13:RP97100. doi: 10.7554/eLife.97100 (PMC12352866; doi:10.7554/eLife.97100)
Supplement: Source data 1. [file elife-97100-data1.xlsx]

## Sheet: Memb. props BC sh. vs broad con
Subject ID	Cell	Mouse Line	Genotype	Type BC	Sex	DOB	ID	Age	Vm	Rm	Cm	Rheobase, pA	Latency ms	AP ampl, mV	AP dur, ms	Area AP	AP height (mv) from baseline	AP heigh as funtion of fAHP	AP thresh, mV	Rise time (10-90%)	Decay time (10-90%)	Max, rise slop (mv/ms)	Max, decay slope (mv/ms)	Ratio max ris/max decay	Tau (Rm x Cm)/1000	fAHP time (ms)	AHP amplit,, mV	Area AHP (ms*mv)	Sag Ih	Firing frequ, At rheobase	File #	Firing freq, Hz at 2x rheobase	spike amplit, AP index At 2x rheobase	spike freq, AP index at 2x rheobase	Current for depol, Block (pA)	Mv depolariz, Block	Fmax	Fss	Adaptation ratio (dimensionless)	Firing	Anatomy	Layer	File #	Injected current
animal 1	140722RF1b	Nkx2.1cre RCE Syngap1 flox	control	short	M	03.05.22	2	72	-76	400	30	120	13.7	47.1	0.52	16.8	80.7	60.5	-42.5	0.280812	0.496864	185.897	-98.2306	-1.89246	12	2.3	-13.4	491.8	0.7	74	3	142	0.63048	1.46296	280	29.3	185.185	128.205	0.692308	fast spiking	BC	4	3	0 pA
animal 1	140722RF4	Nkx2.1cre RCE Syngap1 flox	control	short	M	03.05.22	2	72	-60	160	34	140	28.6	59.4	0.52	16.9	87.2	80.2	-44	0.262385	0.420128	269.536	-133.7	-2.01598	5.44	2.3	-20.7	1002	0.6	2	8	70	0.766942	1.62	580	40.3	181.818	104.987	0.577428	fast spiking	BC	4	8	60 pA
animal 2	180822RF2	Nkx2.1cre RCE Syngap1 flox	control	short	M	06.06.22	2	73	-80	270	31	160	20.4	55.1	0.44	14.7	93.3	76.8	-40.9	0.235874	0.32527	249.847	-161.172	-1.55019	8.37	1.8	-21.7	1114	0.33	42	1	146	0.859621	1.23333	not present		277.778	201.005	0.723618	fast spiking	BC	4	1	0 pA
animal 2	180822RF3	Nkx2.1cre RCE Syngap1 flox	control	short	M	06.06.22	2	73	-76	212	36	160	62.8	56.8	0.65	23.2	90	72.3	-39	0.276578	0.549405	217.949	-98.2306	-2.21874	7.632	2.7	-15.4	728.2	0.7	32	4	98	0.789753	1.28916	560	25.6	178.571	101.781	0.569975	fast spiking	BC	4	4	0 pA
animal 3	190822RF4d	Nkx2.1cre RCE Syngap1 flox	control	short	M	06.06.22	0	74	-66	170	31	200	19.4	61.9	0.7	38.5	93.3	71	-36.8	0.365643	0.66842	187.118	-96.0952	-1.94722	5.27	3	-9.4	944.9	1.7	8	14	124	0.704762	1.39062	480	17.4	175.439	109.29	0.622951	fast spiking	BC	4	14	50 pA
animal 4	210922RF1c	Nkx2.1cre RCE Syngap1 flox	control	short	M	01.07.22	N568	82	-73	200	30	160	18.3	59.7	0.68	27.4	97.5	79.9	-36.6	0.324233	0.518165	201.77	-104.09	-1.93842	6	2.7	-21	1030	1.2	34	3	92	0.707132	1.35714	not present		163.934	99.5025	0.606965	fast spiking	BC	4	3	10 pA
animal 5	220922RF1	Nkx2.1cre RCE Syngap1 flox	control	short	M	01.07.22	N571	83	-70	260	25	120	20.8	67.4	0.69	42.3	99.6	84.1	-42.6	0.350302	0.540108	206.044	-116.606	-1.76702	6.5	2.6	-16.8	1139	1	30	1	102	0.790323	1.15854							BC	4	1	0 pA
animal 5	220922RF3	Nkx2.1cre RCE Syngap1 flox	control	short	M	01.07.22	N571	83	-77	240	38	160	72.3	66.6	0.59	30	100.6	84	-42.6	0.312136	0.463234	228.632	-133.394	-1.71396	9.12	2.2	-17.5	759.4	0.6	26	3	112	0.892128	1.06024	not present		185.185	151.515	0.818182	fast spiking	BC	4	3	0 pA
animal 6	260922RF4	Nkx2.1cre RCE Syngap1 flox	control	short	M	01.07.22	N569	87	-70	320	29	80	47.5	63.3	0.73	31.3	96.6	79.2	-45.9	0.340069	0.611463	194.139	-95.8486	-2.02548	9.28	3	-16.1	830.8	0.1	18	19	66	0.915305	1.29167	not present		188.679	108.401	0.574526	fast spiking with depol. Block	BC	4	19	30 pA
animal 7	270922RF1	Nkx2.1cre RCE Syngap1 flox	control	short	M	15.07.22	0	74	-80	240	41	80	10.2	69	0.71	45.3	82.8	89.6	-55.6	0.350999	0.615003	211.844	-109.28	-1.93855	9.84	2.4	-13.7	707.3	0.9	54	0	94	0.878788	1.69333	not present		217.391	118.694	0.545994	fast spiking	BC	4	0	0 pA
animal 8	280922RF2	Nkx2.1cre RCE Syngap1 flox	control	short	M	15.07.22	1	75	-70	210	35	80	25.5	71.4	0.64	38.8	90.4	84.7	-52.2	0.329846	0.545998	234.594	-123.246	-1.90347	7.35	2.5	-13.6	591.6	0.2	30	6	90	0.912568	1.18947	not present		212.766	142.857	0.671429	fast spiking	BC	4	6 folder 280922secondone	60 pA
Animal 9	070623RF1d	Nkx2,1cre RCE Syngap1 flox	control	short	M	30.03.23	8	72	-70	170	37	200	96.9	59.5	0.69	31.2	97.3	73.1	-41.9	0.32737	0.591515	189.866	-99.2064	-1.91385	6.29	2.8	-13.4		0.67	6	4	74	0.923588	1	not present		144.928	100.341	1.44435	regular no dep. Block	BC	4	4	80 pA
animal 10	140722RF3	Nkx2.1cre RCE Syngap1 flox	control	broad	M	03.05.22	2	72	-75	300	25	160	19.5	46.4	0.9	28.1	82.3	61.6	-36	0.418881	0.786637	127.9	-61.6229	-2.07552	7.5	4.2	-15.3	1085	0.6	2	6	4			200	33.5				fast spiking with depol. Block	BC	4	6	0 pA
animal 11	020822RF3	Nkx2.1cre RCE Syngap1 flox	control	broad	M	30.05.22	1	64	-74	300	27	120	20	58.3	0.92	41.4	90.9	74.3	-40.3	0.433531	0.78869	161.684	-71.7338	-2.25394	8.1	3.7	-16.1	1174	0.9	4	3	80	0.646104	1.3299	320	27.1	103.093	75.3296	0.730697	fast spiking with depol. Block	BC	4	3	0 pA
animal 12	190822RF4a	Nkx2.1cre RCE Syngap1 flox	control	broad	M	06.06.22	0	74	-76	300	24	120	18.4	51.3	0.84	43.4	83.4	59.3	-41.5	0.41677	0.831028	143.99	-65.6288	-2.19401	7.2	3.5	-7.9	1002	0.3	60	9	120	0.758285	1.40323	320	22.3	169.492	113.314	0.668555	fast spiking	BC	4	9	0 pA
animal 12	190822RF5	Nkx2.1cre RCE Syngap1 flox	control	broad	M	06.06.22	0	74	-73	460	30	80	40.2	61.2	0.8	36.7	100.4	77.1	-33.7	0.31897	0.647839	211.844	-88.8278	-2.38488	13.8	3.4	-15.8	479.1	0.7	22	17	70	0.874214	1.67416	440	19.3	196.078	84.7458	0.432203	fast spiking with depol. Block	BC	4	17	40 pA
animal 13	220822RF1	Nkx2.1cre RCE Syngap1 flox	control	broad	M	06.06.22	11	77	-72	260	31	120	18.2	69.7	1.02	66.6	95.4	80.6	-45.2	0.498741	0.942128	163.614	-71.9951	-2.27257	8.06	4	-10.9	1212	0.52	36	0	76	0.769553	1.30841	480	21.7	138.889	75.3296	0.542373	fast spiking	BC	4	0	0 pA
animal 13	220822RF2	Nkx2.1cre RCE Syngap1 flox	control	broad	M	06.06.22	11	77	-65	280	21	80	33.8	80.6	0.97	74.5	108	94.9	-43.9	0.475519	0.834618	195.055	-91.2142	-2.13843	5.88	3.6	-14.4	1168	0.7	12	2	74	0.782667	1.28571	320	22.7	119.048	64.5161	0.541935	fast spiking with depol. Block	BC	4	2	10 pA
animal 14	210922RF1a	Nkx2.1cre RCE Syngap1 flox	control	broad	M	01.07.22	N568	82	-76	320	21	120	11.2	54.5	1.13	45.8	83.9	72.8	-46.1	0.510125	0.899359	125.381	-59.5238	-2.10641	6.72	4.3	-18.7	913.8	0.8	8	1	70	0.637809	1.39048							BC	4	1	0 pA
animal 14	210922RF2d	Nkx2.1cre RCE Syngap1 flox	control	broad	M	01.07.22	N568	82	-69	260	26	120	21.2	62.9	0.84	42.5	95.3	80.7	-41.8	0.412959	0.65528	173.887	-89.0787	-1.95205	6.76	3.1	-17.8	1315	0.5	8	9	94	0.813559	1.24731	600	18.2	153.846	111.111	0.722222	fast spiking with depol. Block	BC	4	9	10 pA
animal 15	220922RF2	Nkx2.1cre RCE Syngap1 flox	control	broad	M	01.07.22	N571	83	-71	240	32	160	17.6	58.4	0.84	36.4	94	74.9	-41	0.37463	0.726688	180.903	-78.4493	-2.30599	7.68	3.5	-16.2	981.9	0.7	42	2	88	0.702265	1.27473	560	21.6	136.986	92.1659	0.672811	fast spiking with depol. Block	BC	4	2	10 pA
animal 16	260922RF2c	Nkx2.1cre RCE Syngap1 flox	control	broad	M	01.07.22	N569	87	-70	360	25	120	21	62	0.89	48.7	101.4	77	-39.5	0.388962	0.788613	196.581	-76.3126	-2.576	9	3.4	-15.5	738	1.1	34	11	76	0.695788	1.49462	520	21.8	142.857	83.682	0.585774	fast spiking with depol. Block	BC	4	11	20 pA
animal 16	260922RF3a	Nkx2.1cre RCE Syngap1 flox	control	broad	M	01.07.22	569	87	-66	340	46	120	23.5	57	0.94	42.7	90.9	70.2	-40.4	0.389199	0.935665	165.14	-61.3553	-2.69154	15.64	4.9	-13.1	1289	0.4	28	12	62	0.747145	1.6	480	24.6	123.457	59.5238	0.482143	fast spiking with depol. Block	BC	4	12	30 pA
animal 16	260922RF3c	Nkx2.1cre RCE Syngap1 flox	control	broad	M	01.07.22	N569	87	-71	260	24	120	20.5	67	0.88	51.7	101.9	84.9	-41.1	0.37339	0.721938	199.817	-85.4701	-2.33786	6.24	3.3	-17.5	949.9	0.6	38	14	82	0.743066	1.43011	520	20.1	147.059	87.5274	0.595186	fast spiking with depol. Block	BC	4	14	10 pA
animal 17	300922RF2c	Nkx2.1cre RCE Syngap1 flox	control	broad	M	19.07.22	3	73	-70	200	24	80	21.5	70.7	0.79	44.6	95.6	88	-49.1	0.348964	0.690061	238.56	-100.122	-2.38269	4.8	3.1	-17.5	1481	0.7	32	25	74	0.857939	1.30841	600	32.6	169.492	102.564	0.605128	fast spiking with depol. Block	BC	4	25	0 pA
Animal 18	150223RF1a	Nkx2,1cre RCE Syngap1 flox	control	broad	M	20.11.22	1204	87	-70	160	33	80	27.3	60.8	1.17	58.1	86	72.9	-52.9	0.438032	1.06424	147.741	-51.2821	-2.88095	5.28	5	-12.4		0.76	2	1	50	0.766055	1.30435							BC	4	1	0 Pa
Animal 19	200323RF2a	Nkx2,1cre RCE Syngap1 flox	control	broad	M	13.01.23	4	66	-70	350	25	120	21.5	69.4	1.21	67.1	104.2	85.3	-47.2	0.521982	1.05747	156.593	-61.3553	-2.55224	8.75	4.5	-15.9		0.76	32	3	66	0.803672	1.41228	not present		128.205	73.1529	1.75256	regular no dep. Block	BC	4	3	50 Pa
Animal 19	200323RF2d	Nkx2,1cre RCE Syngap1 flox	control	broad	M	13.01.23	4	66	-63	280	20	120	22.4	72.3	1.62	100.4	107.4	88	-44.1	0.604256	1.55014	132.173	-43.6508	-3.02797	5.6	5.8	-15.8		0.85	28	5	56	0.74965	1.57252							BC	4	5	50 pA
Animal 20	230523RF1b	Nkx2,1cre RCE Syngap1 flox	control	broad	M	18.03.23	2	66	-68	480	30	80	34.3	67.7	1.32	66.3	104.5	86.3	-43.4	0.602963	1.12713	132.173	-56.1661	-2.35326	14.4	5	-18.7		0.52	24	2	54	0.781792	1.30719	440	-19	96.1538	58.1395	1.65385	regular with dep. Block	BC	4	2	20 pA
Animal 21	230523RF2	Nkx2,1cre RCE Syngap1 flox	control	broad	M	18.03.23	2	66	-66	190	22	160	56.5	74.1	0.85	53	116.2	90	-39.3	0.373704	0.751389	215.985	-93.6547	-2.30619	4.18	3	-15.9		1.1	6	3	70	0.863014	1.58947	not present		156.25	86.2069	1.8125	regular no dep. Block	BC	4	3	80 Pa
Animal 22	070623RF1c	Nkx2,1cre RCE Syngap1 flox	control	broad	M	30.03.23	8	72	-63	250	23	200	6.3	52.9	0.84	43.1	75	68.9	-54.2	0.39489	0.815317	161.783	-68.6813	-2.35556	5.75	3	-8.1		0.52	82	2	136	0.668519	1.32203			178.571	129.87	1.375		BC	4	2	100 pA
Animal 22	070623RF4a	Nkx2,1cre RCE Syngap1 flox	control	broad	M	30.03.23	8	69	-65	400	20	120	108	57.6	0.91	28	101.6	75.1	-34.6	0.427761	0.748597	143.162	-73.5653	-1.94606	8	3.9	-17.6		1.5	28	11	84	0.82906	1.02586							BC	4	11	50 pA
Animal 22	070623RF4b	Nkx2,1cre RCE Syngap1 flox	control	broad	M	30.03.23	8	69	-66	250	31	200	38.5	56.2	0.84	16.6	108.3	74.1	-29.2	0.365282	0.700843	172.772	-73.2601	-2.35833	7.75	4.2	-17.9		1.71	28	13	100	0.704319	1.37179	not present		153.846	99.2556	1.55	regular no dep. Block	BC	4	13	80 pA
							AVG short		-72.3333	237.667	33.0833	138.333	36.3667	61.4333	0.63	29.7	92.4417	77.95	-43.3833	0.313021	0.528798	214.77	-114.092	-1.90211	7.75767	2.525	-16.0583	849	0.725	29.6667	5.5	100.833	0.814283	1.31221	475	28.15	191.97	124.234	0.713429
							SD		5.88269	69.2287	4.52183	43.0292	27.4136	6.74528	0.0921461	10.3135	6.42572	7.83761	5.66197	0.0402599	0.0940045	26.4967	20.379	0.168106	2.03267	0.34935	3.70416	213.675	0.441104	20.6236	5.68091	26.1667	0.0975919	0.208393	136.991	9.50456	34.7843	30.9232	0.255628
							SE		1.69819	19.9846	1.30534	12.4215	7.91363	1.94719	0.0266003	2.97726	1.85495	2.26252	1.63447	0.011622	0.0271368	7.64893	5.88291	0.0485281	0.586781	0.100849	1.0693	61.6826	0.127336	5.95352	1.63994	7.55368	0.0281724	0.0601578	39.546	2.74373	10.0413	8.92676	0.0737933
							AVG broad		-69.4762	297.143	26.6667	123.81	28.6381	62.4286	0.977143	49.319	96.5048	77.9476	-42.119	0.432834	0.860175	168.892	-72.5214	-2.35488	7.95667	3.92381	-15.1905	1060.67	0.773333	26.4762	7.19048	75.5238	0.759724	1.38263	446.154	20.5	144.583	87.2772	0.920184
							SD		4.02019	81.1876	6.00278	35.5635	21.2249	8.50377	0.206909	18.4472	10.4236	9.15825	6.02666	0.0773194	0.207797	31.4669	14.9483	0.273551	3.07719	0.772596	3.11109	262.548	0.343079	19.798	6.5086	26.3128	0.0693198	0.149258	123.122	12.765	26.9422	20.1727	0.507478
							SE		0.877277	17.7166	1.30991	7.76059	4.63166	1.85568	0.0451513	4.02552	2.27461	1.99849	1.31512	0.0168725	0.045345	6.86663	3.26199	0.0596938	0.671499	0.168594	0.678896	57.2927	0.074866	4.32028	1.42029	5.74192	0.0151268	0.0325707	26.8674	2.78555	5.87928	4.40205	0.110741
							LMM
							F value		2.511	4.83	10.973	1.02	0.871	0.04	24.537	9068			0.373	18.653	23.422	19.269	48.186		0.042	37.128	0.551		0.093	0.205		7.082	3.644	0.904			16.315	15.344	2.115
							p value		0.126	*0.036	**0.002	0.323	0.358	0.843	***<0.001	*0.006			0.546	***<0.001	***<0.001	***<0.001	***<0.001		0.838	<0.001	0.464		0.763	0.654		*0.012	0.066	0.353			***<0.001	***<0.001	0.161
