# Supplementary material for: Syngap1 regulates the synaptic drive and membrane excitability of Parvalbumin-positive interneurons in mouse auditory cortex
Source: eLife. 2025 Aug 14;13:RP97100. doi: 10.7554/eLife.97100 (PMC12352866; doi:10.7554/eLife.97100)
Supplement: Source data 2. [file elife-97100-data2.xlsx]

## Sheet: sEPSC SST L4
	Cell	Mouse line	Genotype	Sex	DOB	Mouse #	Age	Amplitude	Inter Event interval	Frequency	AUC	AUC/1000	Charge x freq	Rise	Decay	File	Current injected	Ra	Anatomy	Layer	Tag
Animal 1	141124RF1	Tg(Nkx2.1-Cre);Syngap1flox/+	control	M	04.09.24	5	71	21.81	114.797	8.46032	123.2	0.1232	1.04231	0.69	3.72	8	-20	26	SST	4	GFP
Animal 1	141124RF2	Tg(Nkx2.1-Cre);Syngap1flox/+	control	M	04.09.24	5	71	16.63	181.728	5.44444	96	0.096	0.522667	0.56	4.98	13	-15	27	SST	4	GFP
Animal 2	191121RF5	Tg(Nkx2.1-Cre);Syngap1flox/+	control	M	05.09.21	449	75	15.34	218.789	4.51667	56.67	0.05667	0.25596	0.49	1.84	9	-50	12	SST	4	GFP
Animal 3	310522RF2	Tg(Nkx2.1-Cre);Syngap1flox/+	control	M	31.03.22	N417	61	9.16	140.614	7.04167	28	0.028	0.197167	0.31	1.14	2	-60	11	SST	4	GFP
Animal 4	171121RF1	Tg(Nkx2.1-Cre);Syngap1flox/+	control	M	05.09.21	446	73	8.75	187.149	5.23333	67.8	0.0678	0.35482	0.76	5.38	0	-30	13	SST	4	GFP
Animal 8	140125RF2	Tg(Nkx2.1-Cre);Syngap1flox/+	control	M	26.10.24	Q241	80	16.54	615.181	1.44444	111.8	0.1118	0.161489	0.8	8.9	4	-78	11	SST	4	GFP
Animal 9	150125RF3	Tg(Nkx2.1-Cre);Syngap1flox/+	control	M	13.11.24	Q273	63	27.21	226.72	4.11111	145.1	0.1451	0.596522	0.67	5.76	9	-59	14	SST	4	GFP
Animal 10	160125RF1	Tg(Nkx2.1-Cre);Syngap1flox/+	control	M	13.11.24	Q274	64	15.39	53.9004	18.4841	30.5	0.0305	0.563766	0.22	1.13	0	-23	12	SST	4	GFP
Animal 10	160125RF4	Tg(Nkx2.1-Cre);Syngap1flox/+	control	M	13.11.24	Q274	64	19.79	94.7663	10.4206	44.9	0.0449	0.467887	0.24	1.7	8	16	10	SST	4	GFP
Animal 2	191121RF3	Tg(Nkx2.1-Cre);Syngap1flox/+	control	M	05.09.21	449	75	23.57	153.225	6.44167	186.6	0.1866	1.20201	0.76	5.23	5	-90	13	SST	4	GFP
Animal 2	191121RF4	Tg(Nkx2.1-Cre);Syngap1flox/+	control	M	05.09.21	449	75	17.19	118.511	8.4	133.9	0.1339	1.12476	0.77	5.77	7	-50	12	SST	4	GFP
Animal 12	160721RF1a	Tg(Nkx2.1-Cre);Syngap1flox/+	control	M	09.05.21	552	67	11.1	66.37	15	38	0.038	0.57	0.31	1.93	0	-50	12	SST	4	GFP
Animal 12	160721RF4c	Tg(Nkx2.1-Cre);Syngap1flox/+	control	M	09.05.21	552	67	12.85	294.88	3.34167	58.05	0.05805	0.193984	0.53	3.78	19	-110	12	SST	4	GFP
Animal 13	210322RF3	Tg(Nkx2.1-Cre);Syngap1flox/+	control	M	16.01.22	N151	64	17.79	89.619	11.075	95.36	0.09536	1.05611	0.49	3.2	7	-65	13	SST	4	GFP
Animal 14	230322RF1	Tg(Nkx2.1-Cre);Syngap1flox/+	control	M	16.01.22	N154	66	32.09	95.2341	10.45	174.9	0.1749	1.8277	0.5	3.72	1	-80	11	SST	4	GFP
Animal 14	230322RF3	Tg(Nkx2.1-Cre);Syngap1flox/+	control	M	16.01.22	N154	66	11.47	868.764	1.08333	40.9	0.0409	0.0443083	0.51	4.76	9	-40	14	SST	4	GFP
Animal 3	310522RF1	Tg(Nkx2.1-Cre);Syngap1flox/+	control	M	31.03.22	N417	61	23.16	33.9917	29.3833	111.2	0.1112	3.26743	0.54	3.77	0	-70	12	SST	4	GFP
Animal 20	121124RF5	Tg(Nkx2.1-Cre);Syngap1flox/+	cHet	M	04.09.24	7	69	17.79	332.552	2.95238	98.1	0.0981	0.289629	0.55	5.95	19	-20	18	SST	4	GFP
Animal 5	161221RF4	Tg(Nkx2.1-Cre);Syngap1flox/+	cHet	M	02.10.21	571	75	14.26	136.801	7.24167	71.85	0.07185	0.520314	0.74	3.52	6	-50	11	SST	4	GFP
Animal 7	191124RF1b	Tg(Nkx2.1-Cre);Syngap1flox/+	cHet	M	04.09.24	4	76	12.18	456.776	1.27778	50.47	0.05047	0.0644894	0.45	3.79	15	-14	22	SST	4	GFP
Animal 15	140721RF1b	Tg(Nkx2.1-Cre);Syngap1flox/+	cHet	M	03.05.21	8	72	8.63	134.55	7.33333	45.69	0.04569	0.33506	0.54	3.09	4	-90	17	SST	4	GFP
Animal 15	140721RF2	Tg(Nkx2.1-Cre);Syngap1flox/+	cHet	M	03.05.21	8	72	12.96	982.42	0.966667	39.55	0.03955	0.0382317	0.44	1.73	7	-85	16	SST	4	GFP
Animal 16	020921RF1b	Tg(Nkx2.1-Cre);Syngap1flox/+	cHet	M	25.06.21	628	69	6.16	98.3	10.0417	52.4	0.0524	0.526183	0.9	5.48	5	-70	16	SST	4	GFP
Animal 16	020921RF2b	Tg(Nkx2.1-Cre);Syngap1flox/+	cHet	M	25.06.21	628	69	14.97	79.14	12.575	46.06	0.04606	0.579205	0.31	1.56	9	-90	13	SST	4	GFP
Animal 17	030921RF3a	Tg(Nkx2.1-Cre);Syngap1flox/+	cHet	M	25.06.21	624	70	7.6	422.89	2.33333	40.8	0.0408	0.0952	0.51	2.18	7	-50	12	SST	4	GFP
Animal 18	230921RF2b	Tg(Nkx2.1-Cre);Syngap1flox/+	cHet	M	19.07.21	717	65	13.12	172.62	5.625	31.89	0.03189	0.179381	0.3	1.37	13	-55	11	SST	4	GFP
Animal 19	210921RF2b	Tg(Nkx2.1-Cre);Syngap1flox/+	cHet	M	19.07.21	716	64	8.71	1086.44	0.866667	58.81	0.05881	0.0509687	1.47	6.47	8	-130	12	SST	4	GFP
						control	AVG	17.6376	209.073	8.84304	90.7576	0.0907576	0.791112	0.538235	3.92412
							SD	6.40102	216.42	6.99587	50.4618	0.0504618	0.793542	0.187558	2.04103
							SE	1.55248	52.4894	1.69675	12.2388	0.0122388	0.192462	0.0454895	0.495023
						cHet	AVG	11.638	390.249	5.12135	53.562	0.053562	0.267866	0.621	3.514
							SD	3.7118	365.631	4.10992	19.1592	0.0191592	0.213739	0.349363	1.89063
							SE	1.17377	115.623	1.29967	6.05866	0.00605866	0.0675902	0.110478	0.597869
						LMM
						F value		7.85	2.858	2.518	4.942		4.438	0.546	0.295
						p value		*0.010	0.103	0.125	*0.047		*0.045	0.471	0.594
